# Supplementary material for: Nature versus urban hiking for Veterans with post-traumatic stress disorder: a pilot randomised trial conducted in the Pacific Northwest USA
Source: PubMed Central journal article supplement — BMJ Open. 2021 Sep 23;11(9):e051885. doi: 10.1136/bmjopen-2021-051885 (PMC8461737; doi:10.1136/bmjopen-2021-051885), 2021-09-23
Supplement: bmjopen-2021-051885.draft_revisions.pdf [file bmjopen-2021-051885.draft_revisions.pdf]

# BMJ Open

BMJ Open is committed to open peer review. As part of this commitment we make the peer review history of every article we publish publicly available.

When an article is published we post the peer reviewers' comments and the authors' responses online. We also post the versions of the paper that were used during peer review. These are the versions that the peer review comments apply to.

The versions of the paper that follow are the versions that were submitted during the peer review process. They are not the versions of record or the final published versions. They should not be cited or distributed as the published version of this manuscript.

BMJ Open is an open access journal and the full, final, typeset and author-corrected version of record of the manuscript is available on our site with no access controls, subscription charges or pay-per-view fees (<http://bmjopen.bmj.com>).

If you have any questions on BMJ Open's open peer review process please email [info.bmjopen@bmj.com](mailto:info.bmjopen@bmj.com)

# BMJ Open

## Nature hiking for Veterans with posttraumatic stress disorder: Pilot study design and findings

|                               |                                                                                                                                                                                                                                                                                                                                                                                                                                                                                                                                                                                                                                                                                                                                                                                                                                                                             |
|-------------------------------|-----------------------------------------------------------------------------------------------------------------------------------------------------------------------------------------------------------------------------------------------------------------------------------------------------------------------------------------------------------------------------------------------------------------------------------------------------------------------------------------------------------------------------------------------------------------------------------------------------------------------------------------------------------------------------------------------------------------------------------------------------------------------------------------------------------------------------------------------------------------------------|
| Journal:                      | <i>BMJ Open</i>                                                                                                                                                                                                                                                                                                                                                                                                                                                                                                                                                                                                                                                                                                                                                                                                                                                             |
| Manuscript ID                 | bmjopen-2021-051885                                                                                                                                                                                                                                                                                                                                                                                                                                                                                                                                                                                                                                                                                                                                                                                                                                                         |
| Article Type:                 | Original research                                                                                                                                                                                                                                                                                                                                                                                                                                                                                                                                                                                                                                                                                                                                                                                                                                                           |
| Date Submitted by the Author: | 02-Apr-2021                                                                                                                                                                                                                                                                                                                                                                                                                                                                                                                                                                                                                                                                                                                                                                                                                                                                 |
| Complete List of Authors:     | Littman, Alyson; VA Puget Sound Health Care System, Seattle Epidemiologic Research and Information System and Seattle-Denver Center of Innovation; University of Washington, Epidemiology<br>Bratman, Gregory N; University of Washington<br>Lehavot, Keren; University of Washington School of Public Health, Department of Veterans Affairs Puget Sound Health Care System<br>Engel, Charles C; University of Washington School of Public Health, Department of Veterans Affairs Puget Sound Health Care System<br>Fortney, John ; University of Washington<br>Peterson, Alexander; VA Puget Sound Health Care System, Seattle Epidemiologic Research and Information Center<br>Jones, Alex; Outdoors for All<br>Klassen, Carolyn; Seattle Epidemiologic Research and Information Center<br>Brandon, Josh; Spirit of America<br>Frumkin, Howard; University of Washington |
| Keywords:                     | Adult psychiatry < PSYCHIATRY, TRAUMA MANAGEMENT, COMPLEMENTARY MEDICINE                                                                                                                                                                                                                                                                                                                                                                                                                                                                                                                                                                                                                                                                                                                                                                                                    |
|                               |                                                                                                                                                                                                                                                                                                                                                                                                                                                                                                                                                                                                                                                                                                                                                                                                                                                                             |

SCHOLARONE™  
Manuscripts

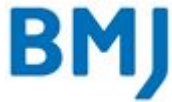

I, the Submitting Author has the right to grant and does grant on behalf of all authors of the Work (as defined in the below author licence), an exclusive licence and/or a non-exclusive licence for contributions from authors who are: i) UK Crown employees; ii) where BMJ has agreed a CC-BY licence shall apply, and/or iii) in accordance with the terms applicable for US Federal Government officers or employees acting as part of their official duties; on a worldwide, perpetual, irrevocable, royalty-free basis to BMJ Publishing Group Ltd ("BMJ") its licensees and where the relevant Journal is co-owned by BMJ to the co-owners of the Journal, to publish the Work in this journal and any other BMJ products and to exploit all rights, as set out in our [licence](#).

The Submitting Author accepts and understands that any supply made under these terms is made by BMJ to the Submitting Author unless you are acting as an employee on behalf of your employer or a postgraduate student of an affiliated institution which is paying any applicable article publishing charge ("APC") for Open Access articles. Where the Submitting Author wishes to make the Work available on an Open Access basis (and intends to pay the relevant APC), the terms of reuse of such Open Access shall be governed by a Creative Commons licence – details of these licences and which [Creative Commons](#) licence will apply to this Work are set out in our licence referred to above.

Other than as permitted in any relevant BMJ Author's Self Archiving Policies, I confirm this Work has not been accepted for publication elsewhere, is not being considered for publication elsewhere and does not duplicate material already published. I confirm all authors consent to publication of this Work and authorise the granting of this licence.

## Nature hiking for Veterans with posttraumatic stress disorder: Pilot study design and findings

Alyson J Littman<sup>1,2,3\*</sup>, Gregory N Bratman<sup>4</sup>, Keren Lehavot<sup>3,6,7</sup>, Charles C Engel<sup>3,6</sup>, John C Fortney<sup>3,5,6</sup>, Alexander Peterson<sup>2</sup>, Alex Jones<sup>8</sup>, Carolyn Klassen<sup>2</sup>, Josh Brandon<sup>9</sup>, Howard Frumkin<sup>10</sup>

<sup>1</sup> Seattle Epidemiologic Research and Information Center, Department of Veterans Affairs Puget Sound Health Care System, Seattle, WA

<sup>2</sup> Department of Epidemiology, School of Public Health, University of Washington, Seattle, WA

<sup>3</sup> Seattle-Denver Center of Innovation for Veteran-Centered and Value-Driven Care, Department of Veterans Affairs Puget Sound Health Care System, Seattle, WA

<sup>4</sup> School of Environmental and Forest Sciences, University of Washington, Seattle, WA

<sup>5</sup> Department of Psychiatry and Behavioral Science, University of Washington, Seattle, WA

<sup>6</sup> Department of Health Services, University of Washington School of Public Health, Seattle, WA

<sup>8</sup> Outdoors for All, Seattle, WA

<sup>9</sup> Spirit of America

<sup>10</sup> Department of Environmental and Occupational Health Sciences, School of Public Health, University of Washington, Seattle, WA

\* Corresponding author

Email: Alyson.littman@va.gov

## ABSTRACT

1  
2  
3 **Objectives:** To evaluate feasibility and acceptability of a group-based nature recreation intervention (nature  
4 hiking) and control condition (urban hiking) for military Veterans with post-traumatic stress disorder (PTSD).

5  
6  
7 **Design and setting:** A pilot randomized controlled trial conducted in the U.S. Pacific Northwest.

8  
9 **Participants:** Veterans with PTSD due to any cause.

10  
11  
12 **Interventions:** Twenty-six participants were randomized to a 12-week intervention involving either six nature  
13 hikes (n=13) or six urban hikes (n=13).

14  
15  
16 **Primary and secondary outcome measures:** Feasibility was assessed based on recruitment, retention and  
17 attendance. Questionnaires and post-intervention qualitative interviews were conducted to explore intervention  
18 acceptability. Questionnaires assessing acceptability and outcomes planned for the future trial (e.g., PTSD  
19 symptoms) were collected at baseline, 6-, 12- (immediately after the final hike) and 24-weeks follow-up.

20  
21  
22  
23  
24  
25 **Results:** Of 415 people assessed for eligibility/interest, 97 were interested and passed preliminary eligibility  
26 screening, and 26 were randomized. Mean completion of all questionnaires was 91% among those in the nature  
27 hiking group and 68% in those in the urban hiking group. Over the course of the intervention, participants in the  
28 nature and urban groups attended an average of 56% and 58%, respectively, of scheduled hikes. Acceptability of  
29 both urban and nature hikes was high; over 70% reported a positive rating (i.e., good/excellent) for the hike  
30 locations, distance, and pace. Median PTSD symptom scores (PTSD Checklist-5) improved more at 12- and 24-  
31 weeks among those in the nature vs. urban hiking group.

32  
33  
34  
35  
36  
37  
38  
39  
40  
41 **Conclusions:** This pilot study largely confirmed the feasibility and acceptability of nature hiking as a potential  
42 treatment for Veterans with PTSD. Adaptations will be needed to improve recruitment and increase hike  
43 attendance for a future randomized controlled trial to effectively test and isolate the ways in which nature  
44 contact, physical activity, and social support conferred by the group impact outcomes.

45  
46  
47  
48  
49 **Trial registration:** Clinicaltrials.gov (NCT03997344)

50  
51  
52  
53  
54 **Key words:** posttraumatic stress disorder, Veterans, nature, hiking, pilot randomized controlled trial

### Strengths and limitations of the study

- The intervention, nature hiking is highly acceptable, and has the potential to be scaled, providing additional and/or alternative treatment options for individuals with PTSD.
- This randomized controlled pilot trial included an active control group (urban hiking) that could permit, in a future large-scale trial, distinguishing benefits due to physical activity and social cohesion (present in both interventions) from the environment (which differs between the interventions).
- We used population-based recruitment methods to understand eligibility in a population selected because of presumed PTSD based on medical record data.
- Because of its small size and focus on feasibility, the trial was not designed to be large enough to determine the effectiveness of nature hiking on outcomes.

**Funding:** This work was funded by Recreational Equipment, Inc. (REI; Award/Grant number is not applicable) and supported by equipment and outfitting contributions from Outdoor Research.

**Competing interests:** The authors have no competing interests to report.

## Introduction

Posttraumatic Stress Disorder (PTSD) is a common, chronic mental health condition that affects up to 30% of military Veterans (1–3). PTSD is frequently comorbid with anxiety, depression, and substance misuse. It increases the risk of suicide as well as obesity, physical inactivity, and cardiovascular and metabolic disorders (1–12).

Clinical practice guidelines recommend treatment with several evidence-based psychotherapies and medications (13), but many patients who need PTSD treatment do not receive it (14). Barriers to obtaining treatment include concerns about medication side effects, desire for self-management approaches, stigma about receiving mental health care, and a lack of confidence in mental health treatment in general (14–17). These and other factors adversely impact engagement, contributing to low initiation of (14,18–22) and high drop-out rates from treatment (20,23,24). Furthermore, while the recommended PTSD treatments improve PTSD symptoms *on average*, approximately 60% of patients still have symptoms at or above diagnostic thresholds for PTSD (25). Thus, identifying a wider range of approaches that are acceptable and effective is key to reducing the burden PTSD places on individuals and their communities.

An increasing number of organizations encourage nature contact (“green prescriptions”) to promote psychological well-being and treat symptoms of mental health disorders (26), though rigorous evidence supporting a benefit is lacking. A number of studies have evaluated the effects of nature-based recreation in populations composed of adults primarily or exclusively with PTSD (27–34). The interventions evaluated vary in content, duration, and structure (35). Though quantitative and qualitative data suggest improvements, methodological issues, including inconsistent outcome measures, low retention for follow-up, absence of control groups, and insufficient statistical power make it difficult to attribute benefits to the program or to understand the mechanisms underlying apparent benefits (36). Adequately powered studies designed to

1  
2  
3 distinguish between benefits due to physical activity (PA) and those due to the physical and social environment  
4  
5 (e.g., nature) are needed.  
6  
7  
8  
9

10 Nature hiking may offer therapeutic value for people with PTSD, as it involves PA, nature contact, and, when  
11 done with others, the potential for forming social connections. Research suggests that each of these elements  
12 could improve outcomes in people with PTSD. PA improves anxiety and depression, stress regulation, sleep, and  
13 cognitive functioning (10,11,37). PA also decreases pain interference and may desensitize individuals to the  
14 physiologic arousal of PTSD. Benefits that have been observed in non-PTSD samples have prompted interest in  
15 evaluating the impact of PA in people with PTSD (37–43). Findings in patients with PTSD have generally been  
16 positive, but only eight studies have involved randomized controlled trial designs (4,40,43–49), and five of the  
17 RCTs were pilot studies or included fewer than 30 people (40,43–45,49). The types of PA studied (yoga, aerobic  
18 activity, strength training, or a combination), the primary etiology of the PTSD (sexual trauma, combat, other or  
19 a combination), the duration of treatment (ranging from 2 to 12 weeks), sample characteristics (female-only vs.  
20 predominantly men) and whether PA was studied as a stand-alone treatment or as an adjunct to evidence-based  
21 psychotherapies have varied widely across studies. Notably, no studies explicitly investigated the PA setting as a  
22 component of treatment, with many using facility-based PA or failing to specify the location of the PA.  
23  
24  
25  
26  
27  
28  
29  
30  
31  
32  
33  
34  
35  
36  
37  
38  
39  
40

41 This is an important omission, because the environment in which PA takes place may play an important role in  
42 the benefits it provides. PA in natural settings improves subjective well-being; decreases stress, anxiety, and  
43 depression; and promotes adaptive shifts in emotion regulation (35,50–52). Attention Restoration Theory (ART)  
44 and Stress Recovery Theory (SRT) provide a theoretical foundation for the observed benefits of nature contact  
45 on health (53,54). ART theorizes that nature contact improves cognitive function through a replenishment of  
46 “directed attention”, a capacity that is overly taxed in urban environments due to the need to block out  
47 distracting stimuli (e.g., noise) to focus on a specific task or cognitive process. This depleted attention capacity  
48  
49  
50  
51  
52  
53  
54  
55  
56  
57  
58  
59  
60



1  
2  
3 can be restored in natural environments through the engagement of “soft fascination”, with implications for  
4  
5 both cognitive and emotional well-being. SRT posits that many types of nature exposure enhance psychological  
6  
7 well-being through an activation of the parasympathetic nervous system in ways that reduce stress and  
8  
9 sympathetic nervous system arousal (55,56).  
10

11  
12  
13  
14 In addition to PA and the physical environment in which it takes place, social factors may also play a role in the  
15  
16 benefits of nature hiking. Recent research suggests that increased social cohesion and connectedness may  
17  
18 mediate benefits of nature-based recreation (57). Social support forged through group activity could be  
19  
20 particularly relevant for Veterans, as camaraderie and solidarity are critical components of military culture, and  
21  
22 ones that are frequently lost in the return to civilian life (58). Social support is associated with reduced PTSD  
23  
24 symptoms and improved treatment response (59), and may directly impact stress response, by increasing  
25  
26 personal resources (60), and/or may indirectly impact PTSD symptom severity and response to treatment  
27  
28 through buffering the potentially harmful impacts of stressful events (61).  
29  
30  
31  
32  
33

34 Guided by prior research and gaps in the literature, our goal was to design and conduct a pilot study to test the  
35  
36 feasibility and acceptability of a nature-based PA intervention for PTSD symptoms in military Veterans,  
37  
38 regardless of PTSD etiology. The intervention (nature hiking) and the active control (urban hiking) were group-  
39  
40 based and involved similar amounts of PA, to ensure control of the potential benefits of the group-based social  
41  
42 support and of PA. Figure 1 depicts our conceptual model. This paper describes the results of the initial pilot  
43  
44 study designed to emulate important elements of the future envisioned full-scale randomized trial.  
45  
46  
47  
48  
49

## 50 **Methods**

51  
52  
53  
54  
55  
56  
57  
58  
59  
60

### Ethics approval

This study was approved by the institutional review boards at the VA Puget Sound Health Care System (MIRB 01738) and the University of Washington (6951) and registered at Clinicaltrials.gov (NCT03997344). Figure 2 presents an overview of the study, including timing of assessments.

### Patient involvement

Patients were involved in the design and conduct of this study. This study question and design were informed by a Veteran with PTSD who served as a co-investigator. Study design and messaging for this pilot were also informed by a focus group of patients/Veterans who participated in a prior unpublished feasibility study.

### Inclusion/Exclusion Criteria

Inclusion criteria included being a U.S. military Veteran and having PTSD (PTSD-checklist-5 (62) score $\geq$ 33). To ensure safety, we excluded those with a hospitalization in the prior 3 months (self-report); a diagnosis of schizophrenia, bipolar disorder, or other psychotic disorder (self-report); inability to perform unsupervised exercise safely (based on the Physical Activity Readiness Questionnaire (63) and provider approval if any conditions were present), drug abuse in past year (Drug Abuse Screening Test-10 (64) score <3); alcohol disorder/dependence (current/past year; Alcohol Use Disorders Identification Test-10 (65) score >16); and moderate/severe suicidality (past month; MINI Suicidality module (66) score $\geq$ 5). Patients also needed to express an ability/willingness to comply with study procedures (e.g., complete questionnaires, wear and sync an activity monitor, drive to hikes, and walk at least 2 hours at an easy/moderate pace over uneven terrain).

### Recruitment

We used active and passive methods to recruit participants. For active recruitment, we mailed invitation letters to VA enrollees (identified using Department of Veterans Affairs (VA) electronic medical records) with at least one encounter with a diagnosis of PTSD in the prior two years and a zip code in one of three Seattle-Tacoma

1  
2  
3 area counties (King, Snohomish, and Pierce) (n=1001). We followed the mailing with up to three phone calls until  
4  
5 we met recruitment targets. For passive recruitment, we placed study recruitment flyers in clinics in the VA  
6  
7 Puget Sound and mailed flyers to four local organizations and clinics serving Veterans.  
8  
9  
10

### 11 12 Screening

13  
14 Individuals were first screened over the phone. Those who passed initial screening were mailed consent forms  
15  
16 and given a link to complete a more extensive screening questionnaire online. Via the online screening  
17  
18 questionnaire, PTSD symptoms, drug use, alcohol misuse, and suicidality were assessed, and a final  
19  
20 determination of eligibility was made. Those who were eligible based on the two steps and returned signed  
21  
22 consents were considered enrolled in the study.  
23  
24  
25

### 26 27 28 Randomization

29  
30 The random 1:1 allocation sequence was generated using simple randomization in random blocks of 2, 4 and 6.  
31  
32 Randomization assignments were placed in opaque sequentially numbered envelopes. Once an individual was  
33  
34 determined to be eligible, the study coordinator selected the next envelope to determine the individual's group  
35  
36 assignment.  
37  
38  
39

### 40 41 Blinding

42  
43 We did not blind participants, the study coordinator, or the study statistician to group assignment.  
44  
45  
46

### 47 48 Interventions, hike leaders, and incentives

49  
50 The study included two arms: group nature and urban hiking. Both the nature and urban hikes followed the  
51  
52 same schedule -- 6 hikes, held every other week on Sunday mornings (12 weeks total) from August through  
53  
54 October 2019. The standard structure for hikes was: 1) "ice breakers" (short, guided conversations), 2) overview  
55  
56  
57  
58  
59

1  
2  
3 of the planned hike, including distance, unique features, and planned stops, 3) hike, and 4) post-hike debrief and  
4  
5 administration of questionnaires.  
6  
7  
8  
9

10 Hike durations increased gradually to account for anticipated increases in participants' physical fitness. Initial  
11 hikes were 60-90 minutes (2-3 miles), and later hikes were 2-3 hours (5-6 miles). To ensure safety and inclusion,  
12  
13 one hike leader was in sight and hearing of the first participant and a second leader accompanied the last  
14  
15 participant. The group stopped at least every 30 minutes to keep everyone together and offer opportunities to  
16  
17 rest, regroup, and inquire about and address any issues or concerns arising since the last check-in.  
18  
19  
20  
21  
22

23 Two non-clinicians (including at least one woman) co-led each nature and urban hike. Leaders were trained to  
24  
25 handle physical and mental health emergencies. The same hike leaders led both nature and urban hikes to  
26  
27 control for hike-leader effects.  
28  
29  
30  
31

32 To reduce barriers to attendance, a \$35 incentive was provided to defray parking costs. We provided a rain  
33  
34 jacket and technical shirt as well as well as an activity monitor (Garmin vivosmart 4) at the participant's first  
35  
36 hike.  
37  
38  
39  
40

#### 41 Selecting hike routes

42

43 The criteria used to select the hikes (which applied to both nature and urban hikes) included duration, elevation  
44  
45 change, availability of facilities (e.g., toilets and water), distance from participants' homes, and access to  
46  
47 parking. Nature hikes were held in State Parks, National Wildlife Refuges, and Natural Resources Conservation  
48  
49 areas. Urban hikes were held in primarily built environments, avoiding urban parks or primarily residential  
50  
51 neighborhoods with substantial greenery or water features. Urban hikes comprised areas that included sports  
52  
53 stadiums, urban art, and retail establishments and were mainly on sidewalks rather than separated  
54  
55  
56  
57  
58  
59  
60

1  
2  
3 bike/pedestrian paths/rail-trails. It was not feasible to match nature and urban hikes on elevation change;  
4  
5 instead, we aimed to have similar hike durations to match total exertion. Generally, nature hikes were shorter  
6  
7 and included more elevation gain/loss.  
8  
9

### 10 11 12 Baseline and follow-up assessments 13

14 We conducted assessments online using commercial software (QuestionPro) at baseline (before hikes began),  
15  
16 and each week after the first hike for 12 weeks (after the 6<sup>th</sup> hike), and then at week 24; questionnaires  
17  
18 completed immediately after the hikes were completed on paper. See Figure 2 for an overview and  
19  
20 Supplemental Table 1 for measures at each time point. Questionnaires at weeks 6, 12, and 24 took  
21  
22 approximately 30 minutes to complete. Questionnaires administered at weeks 1-5 and 7-11 took 5-10 minutes  
23  
24 to complete. Participants received gift cards worth \$10 for questionnaires completed in weeks 1-5 and 7-11, \$20  
25  
26 for the 6-week questionnaire, and \$50 for the 12- and 24-week questionnaires.  
27  
28  
29  
30  
31

### 32 Measures 33

#### 34 *Feasibility measures* 35

36 To evaluate feasibility, we assessed recruitment statistics (the proportion of individuals who were contacted,  
37  
38 eligible, and enrolled, as well as reasons for ineligibility), retention (questionnaire completion), hike attendance,  
39  
40 and safety (e.g., adverse events). We aimed to recruit 36-45 participants (12-15 people allocated to each of the  
41  
42 three groups - nature hiking, urban hiking, and a no-hiking control group) and complete enrollment by July (3-4  
43  
44 months after recruitment initiation) due to concerns about weather for hikes later in the fall. Due to lower-than-  
45  
46 anticipated recruitment numbers, in late June, we decided to eliminate the no-hiking control group. At this time,  
47  
48 only one person was randomized to the no-hiking control group and informed of their group assignment; that  
49  
50 person was re-randomized after this decision was made. The target for retention and attendance was 70%.  
51  
52  
53  
54  
55  
56  
57  
58  
59  
60

### *Acceptability measures*

We included questions on acceptability of the hikes (e.g., distance, pace, terrain, and locations) and satisfaction with the study (e.g., communication) in the 6- and 12-week questionnaires. These questionnaires also included open-ended questions for participants to report what they thought went well and what could have been better. Additionally, after the final hike, the lead author conducted semi-structured telephone interviews, with a goal to interview 10-15 participants. To include a range of perspectives, we purposively sampled participants from both arms, aimed to include men and women, and participants who varied in terms of hike attendance. Questions inquired about participants' impressions of the hikes, including difficulty, location, length of time, distance from home, hike leaders, and reasons hikes were missed (if applicable); study communications; enrollment process; assessments; and other thoughts/impressions. All interviews were recorded; the interviewer also took notes during interviews. For both the comments shared via open-ended questions on the questionnaire and comments shared orally during the interviews, we conducted inductive content analysis, which involves open coding of data, organizing codes and data into categories, and comparing data across participants to identify patterns and themes in the data (67).

### *Outcome (efficacy) measures*

Supplemental Table 1 details the measures and instruments that were assessed at each time point. The primary outcome of the future planned study is the PTSD-Checklist-5 (PCL-5), a 20-item instrument that assesses PTSD symptoms in the past month (range 0 to 80). Higher scores indicate greater symptom severity. The primary purpose of the extensive data collection was to evaluate feasibility of data collection rather than to estimate effect sizes because estimating effect sizes from small pilot studies is inherently imprecise (68). Thus, instead of conducting hypothesis tests for which we were underpowered, we present descriptive statistics (e.g., medians and interquartile ranges) for the PCL-5 only.

## Results

### Participants

The mean age of participants was 47 years (range 25-65), 7 (27%) were women, 42% were non-white race/ethnicity, and 14 (54%) were currently married (Table 1). Thirty percent had a college degree or more. Less than half worked full time and 46% had 100% VA service-connected disability, indicating severe impairment in ability to work. Nearly two-thirds of participants had served in combat and 68% had depressive symptoms based on the PHQ-8. Based on self-report nearly 70% met or exceeded PA guidelines of at least 75 minutes per week of vigorous-intensity activity or 150 minutes per week of moderate-intensity activity, or an equivalent combination of the two. At baseline (prior to study initiation), 81% of participants reported hiking at least one time and 27% completed 7 or more hikes in the prior year.

### Feasibility

#### *Recruitment statistics*

Recruitment took place between April and August 2019 (16 weeks total). Of the 1001 patients mailed an invitation letter, we were unable to assess interest or eligibility in 586 (because they did not respond to the mailings and/or answer the phone when called; see Figure 3 for CONSORT diagram). Of the 415 with whom we made contact, 159 were not interested, 102 had health conditions that limited their walking/hiking, 36 had time conflicts (e.g., work or church on Sundays or travel that would prevent participation), and 37 had other reasons that they were unable to participate (e.g., moving out of the area, travel plans, did not have PTSD, etc.). Of the 97 (81 from letters + 16 from passive recruitment) interested who passed the preliminary eligibility review, 48 completed the online screening questionnaire. Twenty individuals were not eligible, 2 decided that they did not wish to participate, and 26 were eligible and randomized. Of the 20 who were not eligible, 13 were ineligible because of a moderate/high risk of suicide or skipping the question on suicidality, and 6 did not meet the threshold for PTSD.

### *Retention (questionnaire completion)*

Mean completion of all questionnaires was 91% in the nature hiking group and 68% in the urban hiking group.

Completion rates were similar for the shorter weekly questionnaires and the longer questionnaires.

### *Hike attendance*

Over the course of the intervention, participants in the nature and urban groups attended an average of 56% and 58%, respectively, of scheduled hikes. In the nature group, one person attended no hikes, four (31%)

attended 1-2 hikes, one attended 3 hikes, and seven (54%) attended 4-6 hikes. In the urban group, one person attended no hikes, 4 (31%) attended 1-2 hikes, no one attended only 3 hikes, and 8 (62%) attended 4-6 hikes.

Attendance was lower among women in the nature group (n=5, mean: 43%) than among women in the urban group (n=2, 67%), whereas among men, hike attendance was similar in the two groups (65% vs. 56%). Common reasons for missing hikes included work, childcare, and prior plans.

### *Safety/Adverse events*

One participant in the urban hiking arm reported increased anxiety/PTSD symptoms in connection with hiking in the urban environment and withdrew from the study.

### *Acceptability*

#### *Quantitative findings*

Acceptability of both the urban and nature hikes was high. Over 70% reported a positive rating (i.e., good or excellent vs. very poor/inadequate, inadequate, or adequate) for the hike locations, distance, and pace.

#### *Qualitative findings*



1  
2  
3 Overall, qualitative interviews indicated that most participants felt positively about their experience. Veterans  
4 wanted to find more ways of connecting with one another socially during hikes as well as outside of hikes (Table  
5  
6  
7  
8 2). Hike logistics were noted as potential barriers to attendance.  
9

### 10 11 12 Efficacy measures 13

14 Median PCL-5 scores decreased from baseline to week 12 and 24 for those in the nature (baseline=41, 12-weeks  
15 = 32, 24 weeks=31) but not among those in the urban hiking group (baseline=48, 12-weeks = 43, 24 weeks=47)  
16  
17 (Supplemental Figure 1). We did not test the statistical significance of the changes because this pilot study was  
18  
19 not designed to answer this question (70).  
20  
21  
22  
23  
24

### 25 **Discussion** 26

27  
28  
29  
30 This study was an important step to establishing feasibility and acceptability and identifying changes to consider  
31  
32 in the development of a rigorous, fully-powered study to evaluate the impact of nature hiking on PTSD  
33  
34 symptoms. The results of this pilot study were largely positive. Participants reported high acceptability,  
35  
36 enjoyment, and value, based on quantitative and qualitative data. Most participants completed most hikes,  
37  
38 regardless of treatment arm. Feedback about improving the social component supports the hypothesis that  
39  
40 social connection is an important aspect of these hikes, indicating a need to continue to study group  
41  
42 interventions like this one. Additionally, the decrease in median scores on the PCL-5 among those in the nature  
43  
44 group immediately after the 12-week hiking intervention, and 12 weeks later (week 24) is promising. This  
45  
46 preliminary finding should be investigated more thoroughly in future, larger-scale versions of our study. The  
47  
48 indication that improvements may persist after the conclusion of the intervention is especially compelling given  
49  
50 the current unknowns regarding the duration of effects of nature interventions.  
51  
52  
53  
54  
55  
56  
57  
58  
59  
60

1  
2  
3 Nevertheless, several issues need to be considered related to feasibility and acceptability for the next iteration  
4  
5 of this research.  
6  
7  
8  
9

### 10 *Feasibility of recruitment*

11  
12 We fell short of our goal of recruiting at least 36 people over 4 months. Failing to meet recruitment goals in the  
13  
14 planned timeframe is a common problem in randomized controlled trials (71). Barriers to recruitment included  
15  
16 unexpected delays, insufficient resources, and an inefficient recruitment process. Regarding delays, we had to  
17  
18 wait weeks for IRB approval for each proposed modification to recruitment materials/protocol. Our pilot  
19  
20 experience allowed us to pre-test materials and processes, but modifications will likely be needed, so having a  
21  
22 plan that can accommodate a slow start or interruptions would be helpful. Regarding resources, we only had 20  
23  
24 hours per week of paid staff time for recruitment. The addition of two volunteers in the final two months helped  
25  
26 to accelerate enrollment, but more resources earlier in recruitment would have been necessary to meet our  
27  
28 goal.  
29  
30  
31  
32  
33

34  
35 One contributor to inefficiency in recruitment was the broad, population-based approach we employed for  
36  
37 active recruitment. To identify patients for the introductory mailing, the only inclusion criteria were having a  
38  
39 single encounter in VA's electronic medical record with a PTSD diagnosis and living in one of three Puget Sound  
40  
41 counties. The only exclusionary factor was a diagnosis of schizophrenia, bipolar disorder, or other psychotic  
42  
43 disorder. Likely in part because of this broad approach, approximately a quarter of contacted individuals  
44  
45 reported a health condition that impaired their walking. Burdensome study procedures may have also impacted  
46  
47 recruitment. About half of interested participants failed to complete the online screening questionnaire and  
48  
49 numerous people had trouble completing the online questionnaire. Restructuring the recruitment process to  
50  
51 make it faster and easier for potential participants may be necessary.  
52  
53  
54  
55  
56  
57  
58  
59  
60

1  
2  
3 Restrictive eligibility criteria and accessibility of the intervention may have also impacted recruitment. In  
4  
5 addition to being able to walk over uneven ground for at least two hours, participants also had to be available  
6  
7 during the times selected, have low suicide risk, and be free from physical conditions such as high blood  
8  
9 pressure (or obtain their primary care provider's permission) among several other criteria. Changing inclusion  
10  
11 criteria (e.g., eliminating restrictions related to suicidality) would require tradeoffs related to safety that must be  
12  
13 considered carefully.  
14  
15

16  
17  
18 Lastly, about 38% (159/415) of those for whom we were able to assess eligibility and interest declined  
19  
20 participation. While some of these people may have declined because of the additional burdens of a research  
21  
22 study, this statistic indicates that hiking may only appeal to a segment of the population, just as psychotherapy  
23  
24 and pharmacotherapy only appeal to subsets of the population (25). Because of differences in treatment  
25  
26 preferences, offering options is important, and nature hiking merits consideration so that we can rigorously  
27  
28 assess its efficacy.  
29  
30  
31

### 32 33 34 *Retention*

35  
36 Retention varied by group and was poorer for the wrist-worn activity monitor than for the questionnaires. The  
37  
38 activity monitor had a substantial amount of missing data, which is a common problem for activity monitors  
39  
40 (72), and may have been related to the number of technical steps required for setting up the watch and syncing  
41  
42 it, as many participants needed additional help to troubleshoot problems. Providing more support to set up the  
43  
44 watch and incentives to wear and sync it may help to obtain more complete data. While overall questionnaire  
45  
46 completion was high, it was higher in the nature hiking group (91%) than in the urban hiking group (68%).  
47  
48 Though the small sample and our inability to conduct interviews with those who did not complete follow-up  
49  
50 measures makes inference difficult, the retention differences could be a marker of commitment to the study.  
51  
52 Future studies should pay careful attention to marketing the study to ensure that both interventions are  
53  
54  
55  
56  
57  
58  
59  
60

1  
2  
3 perceived as helpful. The difference in incentives provided for questionnaire completion vs. the other aspects of  
4  
5 the study may also have played a role in retention for different study aspects. However, many participants  
6  
7 shared that they participated to help fellow Veterans, indicating altruistic/intrinsic motivators for participation,  
8  
9 reinforcing the importance of understanding drivers of participation, and reducing barriers and enhancing  
10  
11 facilitators.  
12  
13

### 14 15 16 *Acceptability of the hiking interventions*

17  
18 Hike attendance (56%) was lower than our target (70%) and women had lower attendance in the nature hiking  
19  
20 group than men. While we were unable to ascertain reasons for missing hikes for each person, some reasons  
21  
22 reported (e.g., other plans, work) were hard to avoid, while others (driving distance to hikes) could be addressed  
23  
24 in the future by restricting the geographic area of recruitment and hikes and/or organizing small groups at  
25  
26 different times to accommodate individuals' schedules. A history of military sexual trauma, which is common  
27  
28 among women Veterans (73), may have impacted some women participants' comfort and perception of safety  
29  
30 of hiking in nature with a majority male group. Ensuring a greater proportion of female participants in each  
31  
32 group or organizing women-only groups could address this concern. These changes, would, however, result in  
33  
34 additional costs and tradeoffs that would need to be carefully considered.  
35  
36  
37  
38  
39  
40

### 41 *Conclusions*

42  
43 This pilot study provided useful information related to feasibility and acceptability, including common factors  
44  
45 that resulted in exclusion; resources and procedures needed for recruitment; factors to consider for selection of  
46  
47 nature and urban hikes; and barriers and facilitators to achieving high completion in follow-up assessments and  
48  
49 the hikes. These insights can be harnessed to increase participation and rigor in future, scaled-up iterations of  
50  
51 the study, and ensure that environments are safe (i.e., non-triggering). Future studies with larger sample sizes  
52  
53  
54  
55  
56  
57  
58  
59  
60

1  
2  
3  
4  
5  
6  
7  
8  
9  
10  
11  
12  
13  
14  
15  
16  
17  
18  
19  
20  
21  
22  
23  
24  
25  
26  
27  
28  
29  
30  
31  
32  
33  
34  
35  
36  
37  
38  
39  
40  
41  
42  
43  
44  
45  
46  
47  
48  
49  
50  
51  
52  
53  
54  
55  
56  
57  
58  
59  
60

are needed to isolate the ways nature contact, PA, and social support conferred by the group impact outcomes to develop and provide well-tailored interventions.

For peer review only

### List of abbreviations

|       |                                                        |
|-------|--------------------------------------------------------|
| ART   | Attention Restoration Theory                           |
| HIPAA | Health Insurance Portability and Accountability Act    |
| IRB   | Institutional Review Board                             |
| PA    | Physical activity                                      |
| PCL-5 | PTSD Checklist for Diagnostic and Statistical Manual 5 |
| PTSD  | Posttraumatic stress disorder                          |
| SRT   | Stress Recovery Theory                                 |
| VA    | Department of Veterans Affairs                         |

### Acknowledgements

We thank the Veterans who participated in this study for allowing us to learn from them. This material is the result of work supported by VA Puget Sound Health Care System, Seattle, WA. The views expressed in this article are those of the authors and do not necessarily reflect the position or policy of the Department of Veterans Affairs, the United States Government, Recreational Equipment, Inc. (REI), or Outdoor Research.

**Contributors:** AJL, GNB, CCE, JCF, KL, JB, and HF conceptualized the study and contributed to the intervention development and design. AJL and GNB oversaw the conduct of the trial all the authors contributed to the ongoing management of the trial. AJL, GNB, MM, AP, and CK oversaw data collection and data analysis. The manuscript was drafted by AJL. All the authors contributed to the interpretation of the findings and revised and reviewed the paper.

## References

1. Gates MA, Holowka DW, Vasterling JJ, et al. Posttraumatic stress disorder in veterans and military personnel: Epidemiology, screening, and case recognition. *Psychol. Serv.* 2012;9(4):361–382.
2. Fulton JJ, Calhoun PS, Wagner HR, et al. The prevalence of posttraumatic stress disorder in Operation Enduring Freedom/Operation Iraqi Freedom (OEF/OIF) Veterans: A meta-analysis. *J. Anxiety Disord.* 2015;31:98–107.
3. Schlenger WE, Kulka RA, Fairbank JA, et al. The prevalence of post-traumatic stress disorder in the Vietnam generation: A multimethod, multisource assessment of psychiatric disorder. *J. Trauma. Stress* [electronic article]. 1992;5(3):333–363. (<http://doi.wiley.com/10.1002/jts.2490050303>). (Accessed January 13, 2020)
4. Hall KS, Hoerster KD, Yancy WS. Post-traumatic stress disorder, physical activity, and eating behaviors. *Epidemiol. Rev.* 2015;37(1):103–115.
5. Warburton DER, Bredin SSD. Health benefits of physical activity: A systematic review of current systematic reviews. *Curr. Opin. Cardiol.* 2017;32(5):541–556.
6. Veterans Health Administration. Analysis of VA Health Care Utilization among Operation Enduring Freedom (OEF), Operation Iraqi Freedom (OIF), and Operation New Dawn (OND) Veterans. 2013 1–13 p.(<http://www.publichealth.va.gov/epidemiology/reports/oefoifond/health-care-utilization/index.asp>)
7. Kang HK, Li B, Mahan CM, et al. Health of US veterans of 1991 Gulf War: A follow-up survey in 10 years. *J. Occup. Environ. Med.* [electronic article]. 2009;51(4):401–410. (<https://insights.ovid.com/crossref?an=00043764-200904000-00003>). (Accessed January 13, 2020)
8. Magruder KM, McLaughlin KA, Elmore Borbon DL. Trauma is a public health issue. *Eur. J. Psychotraumatol.* 2017;8(1):1375338.
9. Gupta MA. Review of somatic symptoms in post-traumatic stress disorder. *Int. Rev. Psychiatry.* 2013;25(1):86–99.

10. Ginzburg K, Ein-Dor T, Solomon Z. Comorbidity of posttraumatic stress disorder, anxiety and depression: A 20-year longitudinal study of war veterans. *J. Affect. Disord.* 2010;123(1–3):249–257.
11. Frayne SM, Seaver MR, Loveland S, et al. Burden of medical illness in women with depression and posttraumatic stress disorder. *Arch. Intern. Med.* 2004;
12. Dedert EA, Calhoun PS, Watkins LL, et al. Posttraumatic stress disorder, cardiovascular, and metabolic disease: A review of the evidence. *Ann. Behav. Med.* 2010;39(1):61–78.
13. The Management of Posttraumatic Stress Disorder Work Group. VA/DoD Clinical Practice Guidelines for the Management of Posttraumatic Stress Disorder and Acute Stress Disorder. 2017 1–200 p.
14. Hoge CW, Castro CA, Messer SC, et al. Combat duty in Iraq and Afghanistan, mental health problems, and barriers to care. *N. Engl. J. Med.* 2004;351(1):13–22.
15. Sharp ML, Fear NT, Rona RJ, et al. Stigma as a barrier to seeking health care among military personnel with mental health problems. *Epidemiol. Rev.* 2015;37(1):144–162.
16. Wang PS, Berglund P, Olfson M, et al. Failure and delay in initial treatment contact after first onset of mental disorders in the National Comorbidity Survey Replication. *Arch. Gen. Psychiatry.* 2005;62(6):603–613.
17. Stecker T, Shiner B, Watts B V., et al. Treatment-seeking barriers for veterans of the Iraq and Afghanistan conflicts who screen positive for PTSD. *Psychiatr. Serv.* 2013;64(3):280–283.
18. Hoge CW, Grossman SH, Auchterlone JL, et al. PTSD treatment for soldiers after combat deployment: Low utilization of mental health care and reasons for dropout. *Psychiatr. Serv.* 2014;65(8):997–1004.
19. Hundt NE, Helm A, Smith TL, et al. Failure to engage: A qualitative study of veterans who decline evidence-based psychotherapies for PTSD. *Psychol. Serv.* 2018;15(4):536–542.
20. Goetter EM, Bui E, Ojserkis RA, et al. A Systematic Review of Dropout From Psychotherapy for Posttraumatic Stress Disorder Among Iraq and Afghanistan Combat Veterans. *J. Trauma. Stress.* 2015;28(5):401–409.



- 1  
2  
3 21. Foa EB, McLean CP, Zang Y, et al. Effect of Prolonged Exposure Therapy Delivered Over 2 Weeks vs 8  
4 Weeks vs Present-Centered Therapy on PTSD Symptom Severity in Military Personnel A Randomized  
5 Clinical Trial. *JAMA - J. Am. Med. Assoc.* 2018;319(4):354–364.  
6  
7  
8  
9  
10 22. Rauch SAM, Kim HM, Powell C, et al. Efficacy of Prolonged Exposure Therapy, Sertraline Hydrochloride,  
11 and Their Combination among Combat Veterans with Posttraumatic Stress Disorder: A Randomized  
12 Clinical Trial. *JAMA Psychiatry.* 2019;76(2):117–126.  
13  
14  
15  
16 23. Kehle-Forbes SM, Meis LA, Spont MR, et al. Treatment Initiation and Dropout from Prolonged Exposure  
17 and Cognitive Processing Therapy in a VA Outpatient Clinic. *Psychol. Trauma Theory, Res. Pract. Policy.*  
18 2016;8(1):107–114.  
19  
20  
21  
22  
23 24. Keefe JR, Wiltsey Stirman S, Cohen ZD, et al. In rape trauma PTSD, patient characteristics indicate which  
24 trauma-focused treatment they are most likely to complete. *Depress. Anxiety.* 2018;35(4):330–338.  
25  
26  
27  
28 25. Steenkamp MMMM, Marmar CCR, Litz BT, et al. First-line Psychotherapies for Military-Related PTSD.  
29 *JAMA.* 2020;323(7):656.  
30  
31  
32 26. Van den Berg AE. From green space to green prescriptions: Challenges and opportunities for research and  
33 practice. *Front. Psychol.* 2017;8(FEB).  
34  
35  
36  
37 27. Bennett JL, Lundberg NR, Zabriskie R, et al. Addressing posttraumatic stress among Iraq and Afghanistan  
38 veterans and significant others: An intervention utilizing sport and recreation. *Ther. Recreation J.*  
39 [electronic article]. 2014;48(1):74–93.  
40  
41  
42  
43 (http://connection.ebscohost.com/c/articles/94357429/addressing-posttraumatic-stress-among-iraq-  
44 afghanistan-veterans-significant-others-intervention-utilizing-sport-recreation)  
45  
46  
47  
48 28. Bennett JL, Piatt JA, Van Puymbroeck M. Outcomes of a Therapeutic Fly-Fishing Program for Veterans  
49 with Combat-Related Disabilities: A Community-Based Rehabilitation Initiative. *Community Ment. Health*  
50 *J.* [electronic article]. 2017;53(7):756–765. (http://www.ncbi.nlm.nih.gov/pubmed/28303444). (Accessed  
51  
52  
53  
54  
55  
56  
57  
58  
59  
60

- 1  
2  
3 29. Dustin DL, Dustin D, Bricker N, et al. The Promise of River Running as a Therapeutic Medium for Veterans  
4 Coping with Post-Traumatic Stress Disorder. *Ther. Recreation J.* 2011;XIV(4):326–340.  
5  
6  
7 30. Duvall J, Kaplan R. Enhancing the well-being of veterans using extended group-based nature recreation  
8 experiences. *J. Rehabil. Res. Dev.* 2014;51(5):685–696.  
9  
10  
11 31. Gelkopf M, Hasson-Ohayon I, Bikman M, et al. Nature adventure rehabilitation for combat-related  
12 posttraumatic chronic stress disorder: A randomized control trial. *Psychiatry Res.* 2013;209(3):485–493.  
13  
14  
15 32. Hyer L, Boyd S, Scurfield R, et al. Effects of outward bound experience as an adjunct to inpatient PTSD  
16 treatment of war veterans. *J. Clin. Psychol.* 1996;52(3):263–278.  
17  
18  
19 33. Kyriakopoulos A. How individuals with self-reported anxiety and depression experienced a combination  
20 of individual counselling with an adventurous outdoor experience: A qualitative evaluation. *Couns.*  
21 *Psychother. Res.* 2011;11(2):120–128.  
22  
23  
24 34. Vella EJ, Milligan B, Bennett JL. Participation in Outdoor Recreation Program Predicts Improved  
25 Psychosocial Well-Being Among Veterans With Post-Traumatic Stress Disorder: A Pilot Study. *Mil. Med.*  
26 2013;178(3):254–260.  
27  
28  
29 35. Annerstedt M, Währborg P. Nature-assisted therapy: Systematic review of controlled and observational  
30 studies. *Scand. J. Public Health.* 2011;39(4):371–388.  
31  
32  
33 36. Davis-Berman J, Berman D, Berman ND. Outdoor programs as treatment for posttraumatic stress  
34 disorder in veterans: Issues and evidence. *Best Pract. Ment. Heal.* 2018;14(2):9–20.  
35  
36  
37 37. Whitworth JW, Ciccolo JT. Exercise and Post-Traumatic Stress Disorder in Military Veterans: A Systematic  
38 Review. *Mil. Med.* 2016;181(9):953–960.  
39  
40  
41 38. Rosenbaum S, Vancampfort D, Steel Z, et al. Physical activity in the treatment of Post-traumatic stress  
42 disorder: A systematic review and meta-analysis. *Psychiatry Res.* [electronic article]. 2015;230(2):130–  
43 136. (<http://www.ncbi.nlm.nih.gov/pubmed/26500072>). (Accessed January 15, 2020)  
44  
45  
46 39. Hegberg NJ, Hayes JP, Hayes SM. Exercise intervention in PTSD: A narrative review and rationale for  
47  
48  
49  
50  
51  
52  
53  
54  
55  
56  
57  
58  
59  
60

- 1  
2  
3 implementation. *Front. Psychiatry*. 2019;10(MAR).  
4
- 5 40. Powers MB, Medina JL, Burns S, et al. Exercise Augmentation of Exposure Therapy for PTSD: Rationale  
6 and Pilot Efficacy Data. *Cogn. Behav. Ther.* 2015;44(4):314–327.  
7
- 8 41. Oppizzi LM, Umberger R. The Effect of Physical Activity on PTSD. *Issues Ment. Health Nurs.* [electronic  
9 article]. 2018;39(2):179–187. (<https://doi.org/10.1080/01612840.2017.1391903>). (Accessed January 15,  
10 2020)  
11
- 12 42. Hall KS, Morey MC, Beckham JC, et al. The Warrior Wellness Study: A Randomized Controlled Exercise  
13 Trial for Older Veterans with PTSD. *Transl. J. Am. Coll. Sport. Med.* 2018;3(6):43–51.  
14
- 15 43. Hall KS, Morey MC, Beckham JC, et al. Warrior Wellness: A Randomized Controlled Pilot Trial of the  
16 Effects of Exercise on Physical Function and Clinical Health Risk Factors in Older Military Veterans With  
17 PTSD. *J. Gerontol. A. Biol. Sci. Med. Sci.* 2020;75(11):2130–2138.  
18
- 19 44. Kim SH, Schneider SM, Bevans M, et al. PTSD symptom reduction with mindfulness-based stretching and  
20 deep breathing exercise: Randomized controlled clinical trial of efficacy. *J. Clin. Endocrinol. Metab.*  
21 2013;98(7):2984–2992.  
22
- 23 45. Mitchell KS, Dick AM, Dimartino DM, et al. A Pilot Study of a Randomized Controlled Trial of Yoga as an  
24 Intervention for PTSD Symptoms in Women. *J. Trauma. Stress.* 2014;27(2):121–128.  
25
- 26 46. Van Der Kolk BA, Stone L, West J, et al. Yoga as an adjunctive treatment for posttraumatic stress disorder:  
27 A randomized controlled trial. *J. Clin. Psychiatry.* 2014;75(6).  
28
- 29 47. Rosenbaum S, Sherrington C, Tiedemann A. Exercise augmentation compared with usual care for post-  
30 traumatic stress disorder: A randomized controlled trial. *Acta Psychiatr. Scand.* 2015;131(5):350–359.  
31
- 32 48. Goldstein LA, Mehling WE, Metzler TJ, et al. Veterans Group Exercise: A randomized pilot trial of an  
33 Integrative Exercise program for veterans with posttraumatic stress. *J. Affect. Disord.* 2018;227:345–352.  
34
- 35 49. Whitworth JW, Nosrat S, SantaBarbara NJ, et al. Feasibility of Resistance Exercise for Posttraumatic Stress  
36 and Anxiety Symptoms: A Randomized Controlled Pilot Study. *J. Trauma. Stress* [electronic article].  
37  
38  
39  
40  
41  
42  
43  
44  
45  
46  
47  
48  
49  
50  
51  
52  
53  
54  
55  
56  
57  
58  
59  
60

- 2019;32(6):977–984. (<http://www.ncbi.nlm.nih.gov/pubmed/31743507>). (Accessed April 18, 2020)
50. Frumkin H, Bratman GN, Breslow SJ, et al. Nature contact and human health: A research agenda. *Environ. Health Perspect.* 2017;125(7).
51. Barton J, Pretty J. What is the best dose of nature and green exercise for improving mental health- A multi-study analysis. *Environ. Sci. Technol.* 2010;44(10):3947–3955.
52. Wolsko C, Lindberg K, Reese R. Nature-Based Physical Recreation Leads to Psychological Well-Being: Evidence from Five Studies. *Ecopsychology.* 2019;11(4):222–235.
53. Kaplan S. The restorative benefits of nature: Toward an integrative framework. *J. Environ. Psychol.* 1995;15(3):169–182.
54. Ulrich RS, Simons RF, Losito BD, et al. Stress recovery during exposure to natural and urban environments. *J. Environ. Psychol.* 1991;11(3):201–230.
55. van den Berg MMHE, Maas J, Muller R, et al. Autonomic nervous system responses to viewing green and built settings: Differentiating between sympathetic and parasympathetic activity. *Int. J. Environ. Res. Public Health.* 2015;12(12):15860–15874.
56. Kobayashi H, Song C, Ikei H, et al. Analysis of Individual Variations in Autonomic Responses to Urban and Forest Environments. *Evidence-based Complement. Altern. Med.* 2015;2015.
57. Jennings V, Bamkole O. The relationship between social cohesion and urban green space: An avenue for health promotion. *Int. J. Environ. Res. Public Health* [electronic article]. 2019;16(3). (<https://pubmed.ncbi.nlm.nih.gov/30720732/>). (Accessed March 26, 2021)
58. Junger S. *Tribe: on homecoming and belonging*. New York, NY: Hatchette; 2016.
59. Price M, Lancaster CL, Gros DF, et al. An Examination of Social Support and PTSD Treatment Response During Prolonged Exposure. *Psychiatry (New York).* 2018;81(3):258–270.
60. Zang Y, Gallagher T, McLean CP, et al. The impact of social support, unit cohesion, and trait resilience on PTSD in treatment-seeking military personnel with PTSD: The role of posttraumatic cognitions. *J.*

- 1  
2  
3 *Psychiatr. Res.* 2017;86:18–25.  
4  
5  
6 61. Cohen S, Wills TA. Stress, Social Support, and the Buffering Hypothesis. *Psychol. Bull.* 1985;98(2):310–  
7  
8 357.  
9  
10 62. Weathers FW, Litz BT, Keane TM, et al. The PTSD Checklist for DSM-5 (PCL-5). *Natl. Cent. PTSD.*  
11  
12 2013;5(August):2002.  
13  
14 63. Thomas S, Reading J, Shephard RJ. Revision of the Physical Activity Readiness Questionnaire (PAR-Q).  
15  
16 *Can. J. Sport Sci.* 1992;17(4):338–345.  
17  
18 64. Yudko E, Lozhkina O, Fouts A. A comprehensive review of the psychometric properties of the Drug Abuse  
19  
20 Screening Test. *J. Subst. Abuse Treat.* 2007;32(2):189–198.  
21  
22 65. Saunders JB, Aasland OG, Babor TF, et al. Development of the Alcohol Use Disorders Identification Test  
23  
24 (AUDIT): WHO Collaborative Project on Early Detection of Persons with Harmful Alcohol Consumption-II.  
25  
26 *Addiction.* 1993;88(6):791–804.  
27  
28 66. Sheehan D V., Lecrubier Y, Sheehan KH, et al. The Mini-International Neuropsychiatric Interview  
29  
30 (M.I.N.I.): The development and validation of a structured diagnostic psychiatric interview for DSM-IV  
31  
32 and ICD-10. In: *Journal of Clinical Psychiatry.* 1998:22–33.  
33  
34 67. Elo S, Kyngäs H. The qualitative content analysis process. *J. Adv. Nurs.* 2008;62(1):107–115.  
35  
36 68. Leon AC, Davis LL, Kraemer HC. The role and interpretation of pilot studies in clinical research. *J.*  
37  
38 *Psychiatr. Res.* 2011;45(5):626–629.  
39  
40 69. Craig CL, Marshall AL, Sjöström M, et al. International physical activity questionnaire: 12-Country  
41  
42 reliability and validity. *Med. Sci. Sports Exerc.* 2003;35(8):1381–1395.  
43  
44 70. Kraemer HC, Mintz J, Noda A, et al. Caution regarding the use of pilot studies to guide power calculations  
45  
46 for study proposals. *Arch. Gen. Psychiatry* [electronic article]. 2006;63(5):484–489.  
47  
48 (<http://archpsyc.jamanetwork.com/article.aspx?doi=10.1001/archpsyc.63.5.484>). (Accessed April 20,  
49  
50 2019)

- 1  
2  
3 71. Walters SJ, Dos Anjos Henriques-Cadby IB, Bortolami O, et al. Recruitment and retention of participants  
4 in randomised controlled trials: A review of trials funded and published by the United Kingdom Health  
5 Technology Assessment Programme. *BMJ Open* [electronic article]. 2017;7(3):15276.  
6  
7  
8  
9  
10 (http://www.isrctn.com/). (Accessed December 31, 2020)  
11  
12 72. Troiano RP, Berrigan D, Dodd KW, et al. Physical activity in the United States measured by accelerometer.  
13  
14 *Med. Sci. Sports Exerc.* 2008;40(1):181–188.  
15  
16 73. Wilson LC. The Prevalence of Military Sexual Trauma: A Meta-Analysis. *Trauma, Violence, Abus.*  
17  
18 2018;19(5):584–597.  
19  
20  
21  
22  
23  
24  
25  
26  
27  
28  
29  
30  
31  
32  
33  
34  
35  
36  
37  
38  
39  
40  
41  
42  
43  
44  
45  
46  
47  
48  
49  
50  
51  
52  
53  
54  
55  
56  
57  
58  
59  
60

1  
2  
3  
4  
5  
6  
7  
8  
9  
10  
11  
12  
13  
14  
15  
16  
17  
18  
19  
20  
21  
22  
23  
24  
25  
26  
27  
28  
29  
30  
31  
32  
33  
34  
35  
36  
37  
38  
39  
40  
41  
42  
43  
44  
45  
46  
47  
48  
49  
50  
51  
52  
53  
54  
55  
56  
57  
58  
59  
60

Figure 1. Conceptual model

Figure 2. Depiction of study design and assessments

Figure 3. CONSORT diagram

For peer review only

**Table 1. Baseline characteristics of Veterans in the urban and nature hiking groups**

| Characteristic             | Total (n=26) |            | Nature (n=13) |            | Urban (n=13) |            |
|----------------------------|--------------|------------|---------------|------------|--------------|------------|
|                            | N or<br>mean | % or<br>SD | N or<br>Mean  | % or<br>SD | N or<br>Mean | % or<br>SD |
| <b>Age (years)</b>         |              |            |               |            |              |            |
| <30                        | 2            | 8          | 1             | 8          | 1            | 8          |
| 30-39                      | 5            | 19         | 2             | 15         | 3            | 23         |
| 40-49                      | 6            | 23         | 4             | 31         | 2            | 15         |
| 50-59                      | 11           | 42         | 6             | 46         | 5            | 38         |
| ≥60                        | 2            | 8          | 0             | 0          | 2            | 15         |
| <b>Gender</b>              |              |            |               |            |              |            |
| Male                       | 19           | 73         | 8             | 62         | 11           | 85         |
| Female                     | 7            | 27         | 5             | 38         | 2            | 15         |
| <b>Race/ethnicity</b>      |              |            |               |            |              |            |
| Asian/Pacific Islander, NH | 3            | 12         | 2             | 15         | 1            | 8          |
| Black, NH                  | 2            | 8          | 0             | 0          | 2            | 15         |
| Hispanic                   | 3            | 12         | 1             | 8          | 2            | 15         |
| Native American, NH        | 2            | 8          | 0             | 0          | 2            | 15         |
| Other                      | 1            | 4          | 0             | 0          | 1            | 7.7        |
| White, NH                  | 15           | 58         | 10            | 77         | 5            | 38         |
| <b>Marital status</b>      |              |            |               |            |              |            |
| Single, never married      | 4            | 15         | 3             | 23         | 1            | 8          |
| Married currently          | 14           | 54         | 7             | 54         | 7            | 54         |



| Characteristic                                                              | Total (n=26) |            | Nature (n=13) |            | Urban (n=13) |            |
|-----------------------------------------------------------------------------|--------------|------------|---------------|------------|--------------|------------|
|                                                                             | N or<br>mean | % or<br>SD | N or<br>Mean  | % or<br>SD | N or<br>Mean | % or<br>SD |
| Separated/divorced                                                          | 8            | 31         | 3             | 23         | 5            | 38         |
| <b>Education</b>                                                            |              |            |               |            |              |            |
| High school degree or equivalent                                            | 4            | 15         | 1             | 8          | 3            | 23         |
| Some college, no degree                                                     | 10           | 38         | 7             | 54         | 3            | 23         |
| Associate degree                                                            | 4            | 15         | 1             | 8          | 3            | 23         |
| Bachelor's degree                                                           | 4            | 15         | 2             | 15         | 2            | 15         |
| Masters, doctorate, or professional<br>degree                               | 4            | 15         | 2             | 15         | 2            | 15         |
| <b>Annual household income</b>                                              |              |            |               |            |              |            |
| \$25,000-\$49,999                                                           | 7            | 27         | 4             | 31         | 3            | 23         |
| \$50,000-\$74,999                                                           | 11           | 42         | 4             | 31         | 7            | 54         |
| \$75,000-\$99,999                                                           | 2            | 8          | 1             | 8          | 1            | 8          |
| \$100,000 or more                                                           | 4            | 15         | 3             | 23         | 1            | 8          |
| Prefer not to answer                                                        | 2            | 8          | 1             | 8          | 1            | 8          |
| <b>Employment status</b>                                                    |              |            |               |            |              |            |
| Full-time                                                                   | 12           | 46         | 6             | 46         | 6            | 46         |
| Part-time                                                                   | 1            | 4          | 1             | 8          | 0            | 0          |
| Not employed (disabled, retired, not<br>looking for work, homemaker, other) | 13           | 50         | 6             | 46         | 7            | 54         |
| <b>Highest military rank</b>                                                |              |            |               |            |              |            |

| Characteristic                               | Total (n=26) |            | Nature (n=13) |            | Urban (n=13) |            |
|----------------------------------------------|--------------|------------|---------------|------------|--------------|------------|
|                                              | N or<br>mean | % or<br>SD | N or<br>Mean  | % or<br>SD | N or<br>Mean | % or<br>SD |
| Enlisted (E1-E4)                             | 9            | 35         | 4             | 31         | 5            | 38         |
| Non-commissioned officer (E5-E9)             | 15           | 58         | 8             | 62         | 7            | 54         |
| Officer (O1-O4)                              | 2            | 8          | 1             | 8          | 1            | 8          |
| <b>VA disability rating*†</b>                |              |            |               |            |              |            |
| No rating                                    | 2            | 8          | 0             | 0          | 2            | 15         |
| 30-60%                                       | 2            | 8          | 2             | 15         | 0            | 0          |
| 70-90%                                       | 8            | 31         | 4             | 31         | 4            | 31         |
| 100%                                         | 12           | 46         | 6             | 46         | 6            | 46         |
| <b>Self-reported health</b>                  |              |            |               |            |              |            |
| Excellent/very good                          | 9            | 35         | 3             | 23         | 6            | 45         |
| Good                                         | 11           | 42         | 7             | 54         | 4            | 31         |
| Fair (no one reported poor)                  | 6            | 23         | 3             | 23         | 3            | 23         |
| <b>PCL-5 score‡</b>                          |              |            |               |            |              |            |
| Mean, SD                                     | 47.1         | 10.9       | 46.0          | 11.4       | 48.2         | 10.8       |
| <b>Served in combat [yes]</b>                | 17           | 65         | 8             | 62         | 9            | 69         |
| <b>Combat Exposure Score; mean (SD)* †</b>   | 16.6         | 7.9        | 15.6          | 8.2        | 17.7         | 7.9        |
| <b>Patient Health Questionnaire-8 score*</b> |              |            |               |            |              |            |
| <10 (no depression)                          | 8            | 32         | 4             | 33         | 4            | 31         |
| 10-19 (major depression)                     | 14           | 56         | 7             | 58         | 7            | 54         |
| ≥20 (severe major depression)                | 3            | 12         | 1             | 8          | 2            | 15         |

| Characteristic                                                        | Total (n=26) |            | Nature (n=13) |            | Urban (n=13) |            |
|-----------------------------------------------------------------------|--------------|------------|---------------|------------|--------------|------------|
|                                                                       | N or<br>mean | % or<br>SD | N or<br>Mean  | % or<br>SD | N or<br>Mean | % or<br>SD |
| <b>Physical activity level</b>                                        |              |            |               |            |              |            |
| Low                                                                   | 8            | 31         | 5             | 38         | 3            | 23         |
| Moderate                                                              | 3            | 12         | 1             | 8          | 2            | 15         |
| High                                                                  | 15           | 58         | 7             | 54         | 8            | 62         |
| <b>Times gone hiking for 1+ hrs in last year</b>                      |              |            |               |            |              |            |
| Never                                                                 | 5            | 19         | 3             | 23         | 2            | 15         |
| 1-3                                                                   | 9            | 35         | 4             | 31         | 5            | 38         |
| 4-6                                                                   | 5            | 19         | 2             | 15         | 3            | 23         |
| 7+                                                                    | 7            | 27         | 4             | 31         | 3            | 23         |
| <b>Outdoor / nature-based activity<br/>experience</b>                 |              |            |               |            |              |            |
| None (no experience in the outdoors)                                  | 0            | 0          | 0             | 0          | 0            | 0          |
| Casual (done some day hiking on<br>maintained trails and car camping) | 10           | 38         | 5             | 38         | 5            | 38         |
| Amateur (have experience with<br>backpacking)                         | 11           | 42         | 6             | 46         | 5            | 38         |
| Expert (substantial backcountry<br>experience)                        | 5            | 19         | 2             | 15         | 3            | 23         |

Abbreviations: NH, Non-Hispanic; PCL-5, Post-traumatic stress disorder checklist for Diagnostic and Statistical Manual 5; PTSD, post-traumatic stress disorder; SD, standard deviation

\* Missing response for 1 nature participant

1  
2  
3 † Missing response for 1 urban participant  
4  
5

6 ‡ One person in the nature hiking group had a PCL-5 of 32 (below the eligibility threshold of 33) due to  
7  
8 an undetected error in initial scoring.  
9  
10  
11  
12  
13  
14  
15  
16  
17  
18  
19  
20  
21  
22  
23  
24  
25  
26  
27  
28  
29  
30  
31  
32  
33  
34  
35  
36  
37  
38  
39  
40  
41  
42  
43  
44  
45  
46  
47  
48  
49  
50  
51  
52  
53  
54  
55  
56  
57  
58  
59  
60

For peer review only

Table 2. Key themes and findings from qualitative data

| Themes                | Findings                                                                                                                                                                                                                                                                                                                                                                                                                                                                                                                                                    |
|-----------------------|-------------------------------------------------------------------------------------------------------------------------------------------------------------------------------------------------------------------------------------------------------------------------------------------------------------------------------------------------------------------------------------------------------------------------------------------------------------------------------------------------------------------------------------------------------------|
| A positive experience | <ul style="list-style-type: none"> <li>Both nature hiking group members (“All expectations were exceeded”) and urban study participants (“LOVE THE GROUP”) provided positive feedback.</li> </ul>                                                                                                                                                                                                                                                                                                                                                           |
| Perceived benefits    | <ul style="list-style-type: none"> <li>Participants reported on how the hikes helped them to be more active, lose weight, reduce stress, and feel more connected to others.</li> </ul>                                                                                                                                                                                                                                                                                                                                                                      |
| Hike logistics        | <ul style="list-style-type: none"> <li>Participants suggested that prior to hikes, we ensure parking access, availability of toilets, and locate the hikes closer to participants’ homes.</li> <li>Others suggested that we consider organizing carpools and/or covering gas/mileage costs</li> </ul>                                                                                                                                                                                                                                                       |
| Difficulty of hikes   | <ul style="list-style-type: none"> <li>Most found the difficulty just right.</li> <li>Some felt that the hikes were too short/easy.</li> </ul>                                                                                                                                                                                                                                                                                                                                                                                                              |
| Location of hikes     | <ul style="list-style-type: none"> <li><u>Nature group</u>: One participant wished that there was more of a “reward” (“like a waterfall”, “when you have a view, it seems more profound”), because some were just “walks through the woods.”</li> <li><u>Urban group</u>: One person noted that some neighborhoods were “sketchy” and they were “constantly walking around garbage” for one hike. Others noted that they really enjoyed exploring different neighborhoods, areas around sports stadium, and learning about the history of areas.</li> </ul> |

|                                                                   |                                                                                                                                                                                                                                                                                                                                                                                                                                                                                                                                                                                                                                                                        |
|-------------------------------------------------------------------|------------------------------------------------------------------------------------------------------------------------------------------------------------------------------------------------------------------------------------------------------------------------------------------------------------------------------------------------------------------------------------------------------------------------------------------------------------------------------------------------------------------------------------------------------------------------------------------------------------------------------------------------------------------------|
| Group composition                                                 | <ul style="list-style-type: none"> <li>• A few participants suggested that we enroll more women or organize women-only groups and/or groups for survivors of sexual assault.</li> </ul>                                                                                                                                                                                                                                                                                                                                                                                                                                                                                |
| Incentives for completing questionnaires                          | <ul style="list-style-type: none"> <li>• Participants suggested that we offer the option to receive a single gift card that accumulated value instead of separate ones each time a questionnaire was completed.</li> </ul>                                                                                                                                                                                                                                                                                                                                                                                                                                             |
| Assessments                                                       | <ul style="list-style-type: none"> <li>• Several participants had trouble with the online software (e.g., getting “kicked out” of the survey mid-way through);</li> <li>• Some participants reported that they would have liked text prompts instead of email, since they did not regularly check their email.</li> <li>• Some participants found some questions to be difficult to answer (e.g., the Perceived Cohesion Scale) or they were confused by differences in the time frame for different instruments (e.g., on the weekly questionnaires, some questions asked participants how they felt “right now” while others asked about the prior week).</li> </ul> |
| Activity monitors                                                 | <ul style="list-style-type: none"> <li>• Several participants noted having problems programming and syncing the activity monitor.</li> </ul>                                                                                                                                                                                                                                                                                                                                                                                                                                                                                                                           |
| Fostering interaction/connections between participants in a group | <ul style="list-style-type: none"> <li>• Participants suggested facilitating more structured ways to get to know other members of the group, including a social gathering prior to the initial hike, re-introductions before each hike, gathering for lunch or other meal after hikes, and organizing a social media group.</li> </ul>                                                                                                                                                                                                                                                                                                                                 |

1  
2  
3  
4  
5  
6  
7  
8  
9  
10  
11  
12  
13  
14  
15  
16  
17  
18  
19  
20  
21  
22  
23  
24  
25  
26  
27  
28  
29  
30  
31  
32  
33  
34  
35  
36  
37  
38  
39  
40  
41  
42  
43  
44  
45  
46  
47  
48  
49  
50  
51  
52  
53  
54  
55  
56  
57  
58  
59  
60

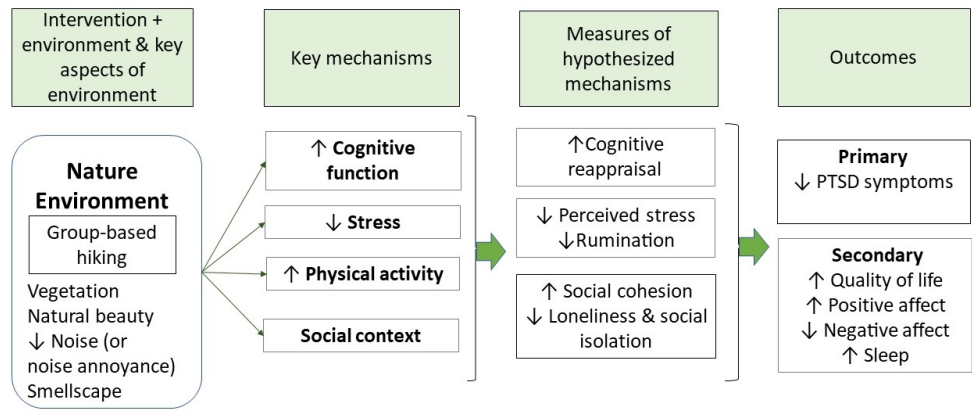

Figure 1. Conceptual model  
338x190mm (96 x 96 DPI)

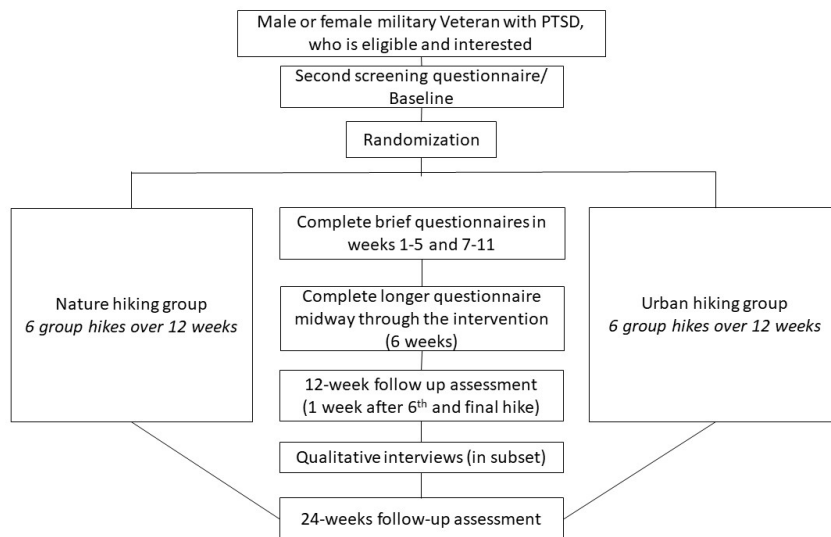

Figure 2. Depiction of study design and assessments

338x190mm (96 x 96 DPI)



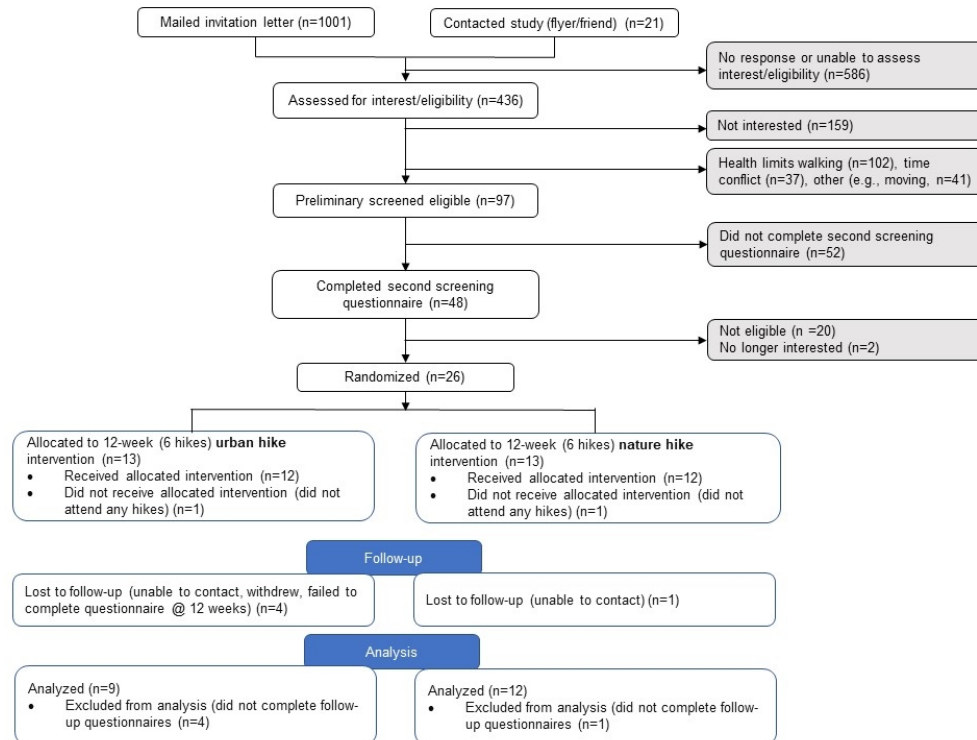

**Supplemental Table 1. Constructs, instruments, and timing of assessments**

| Constructs                                               | Instrument                                                                               |
|----------------------------------------------------------|------------------------------------------------------------------------------------------|
| Demographics                                             | n/a (Age, gender, race/ethnicity, education, service-connected disability, etc.)         |
| Combat exposure                                          | First two questions of the PTSD Diagnostic Scale-5 (73) and Combat Exposure Scale (74)   |
| Ability to safely perform unsupervised physical activity | Physical Activity Readiness Questionnaire (PAR-Q) (62)                                   |
| Suicidal ideation                                        | MINI Suicidality module (65)                                                             |
| QoL/well-being                                           | Satisfaction with Life Scale (75)                                                        |
| Physical health                                          | 14-item Physical Health Questionnaire (76)                                               |
| PTSD symptoms                                            | PTSD Checklist for DSM- 5 (61)                                                           |
| Depression                                               | Personal Health Questionnaire (PHQ)-8 (77)                                               |
| Perceived Stress                                         | 4-item Perceived Stress Scale (PSS) (78,79)                                              |
| Affect                                                   | 20-item Positive and Negative Affect Schedule (PANAS) (80,81)                            |
|                                                          | 10-item PANAS                                                                            |
| Loneliness                                               | 3-item UCLA loneliness scale (82)                                                        |
| Social connectedness                                     | First four items of the 6-item Perceived Cohesion Scale (83)                             |
| Anxiety                                                  | 20-item Stress and Anxiety Scale (STAI) – state level                                    |
|                                                          | 6-item STAI                                                                              |
| Sleep                                                    | Full (19-item) Pittsburgh Sleep Quality Index (PSQI) (84)                                |
|                                                          | Shortened (5-item) PSQI                                                                  |
| Nature connection                                        | Connectedness to Nature Scale (6-items) (85)                                             |
| Rumination                                               | Full (12-item) state rumination (brooding subscale of Rumination Reflection Scale [RRS]) |
|                                                          | Shortened (8-item) state rumination (brooding subscale of RRS) (86)                      |
| Cognitive reappraisal                                    | 4-item state emotion regulation questionnaire (ERQ) (87)                                 |
| Physical activity – self report                          | 9-item International Physical Activity Questionnaire (IPAQ) short form (68)              |

| Constructs                                 | Instrument                                                     |
|--------------------------------------------|----------------------------------------------------------------|
| Physical activity monitor                  | Wrist worn activity monitor (Garmin Vivosmart 4)               |
| Alcohol consumption                        | 10-item Alcohol Use Disorders Identification Test (AUDIT) (64) |
|                                            | 3-item (AUDIT-C) (88)                                          |
| Drug-related problems                      | Drug Abuse Screening Test-10 (63)                              |
| PTSD treatments                            | n/a                                                            |
| Preference for treatment, hiking frequency | n/a                                                            |
| and expectation about treatment            | n/a                                                            |
| Acceptability of hikes                     | n/a                                                            |

‡Timing of assessment: S/B: screening/baseline, WK: weekly – weeks 1-5 and 7-11, FU: 6-, 12-, and 24-week follow-ups

†A, acceptability; CO, covariate (including moderators); E, eligibility (to assess inclusion/exclusion criteria); M, mediator P, primary outcome; S, secondary outcome

Figure 1. PTSD Checklist scores at baseline, 12- and to 24-weeks follow-up

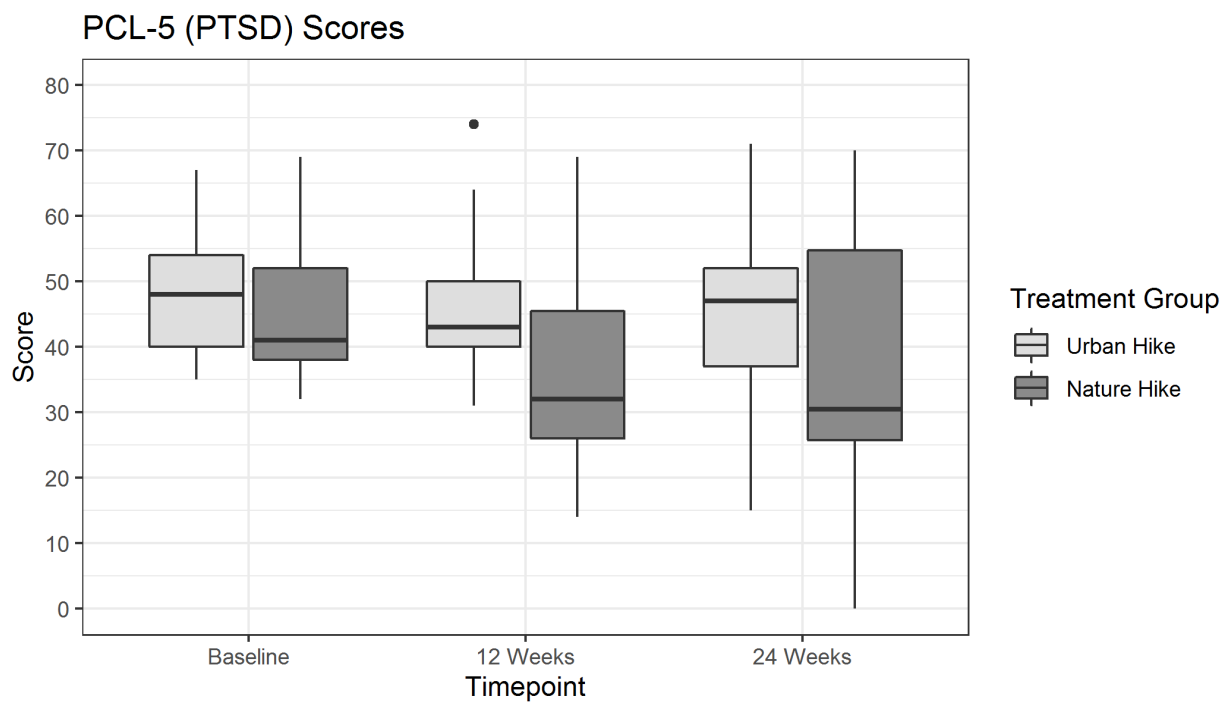

review only

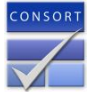

## CONSORT 2010 checklist of information to include when reporting a pilot or feasibility trial\*

| Section/Topic                    | Item No | Checklist item                                                                                                                                                                              | Reported on page No |
|----------------------------------|---------|---------------------------------------------------------------------------------------------------------------------------------------------------------------------------------------------|---------------------|
| <b>Title and abstract</b>        |         |                                                                                                                                                                                             |                     |
|                                  | 1a      | Identification as a pilot or feasibility randomised trial in the title                                                                                                                      | 1                   |
|                                  | 1b      | Structured summary of pilot trial design, methods, results, and conclusions (for specific guidance see CONSORT abstract extension for pilot trials)                                         | 2                   |
| <b>Introduction</b>              |         |                                                                                                                                                                                             |                     |
| Background and objectives        | 2a      | Scientific background and explanation of rationale for future definitive trial, and reasons for randomised pilot trial                                                                      | 4-7                 |
|                                  | 2b      | Specific objectives or research questions for pilot trial                                                                                                                                   | 6-7                 |
| <b>Methods</b>                   |         |                                                                                                                                                                                             |                     |
| Trial design                     | 3a      | Description of pilot trial design (such as parallel, factorial) including allocation ratio                                                                                                  | 7                   |
|                                  | 3b      | Important changes to methods after pilot trial commencement (such as eligibility criteria), with reasons                                                                                    | 10-11               |
| Participants                     | 4a      | Eligibility criteria for participants                                                                                                                                                       | 7                   |
|                                  | 4b      | Settings and locations where the data were collected                                                                                                                                        | 7,9-10              |
|                                  | 4c      | How participants were identified and consented                                                                                                                                              | 8                   |
| Interventions                    | 5       | The interventions for each group with sufficient details to allow replication, including how and when they were actually administered                                                       | 8-9                 |
| Outcomes                         | 6a      | Completely defined prespecified assessments or measurements to address each pilot trial objective specified in 2b, including how and when they were assessed                                | 10-11               |
|                                  | 6b      | Any changes to pilot trial assessments or measurements after the pilot trial commenced, with reasons                                                                                        | n/a                 |
|                                  | 6c      | If applicable, prespecified criteria used to judge whether, or how, to proceed with future definitive trial                                                                                 | n/a                 |
| Sample size                      | 7a      | Rationale for numbers in the pilot trial                                                                                                                                                    | 10-11               |
|                                  | 7b      | When applicable, explanation of any interim analyses and stopping guidelines                                                                                                                | n/a                 |
| Randomisation:                   |         |                                                                                                                                                                                             |                     |
| Sequence generation              | 8a      | Method used to generate the random allocation sequence                                                                                                                                      | 8                   |
|                                  | 8b      | Type of randomisation(s); details of any restriction (such as blocking and block size)                                                                                                      | 8                   |
| Allocation concealment mechanism | 9       | Mechanism used to implement the random allocation sequence (such as sequentially numbered containers), describing any steps taken to conceal the sequence until interventions were assigned | 8                   |

|                                                      |     |                                                                                                                                                                                       |                       |
|------------------------------------------------------|-----|---------------------------------------------------------------------------------------------------------------------------------------------------------------------------------------|-----------------------|
| Implementation                                       | 10  | Who generated the random allocation sequence, who enrolled participants, and who assigned participants to interventions                                                               | 8                     |
| Blinding                                             | 11a | If done, who was blinded after assignment to interventions (for example, participants, care providers, those assessing outcomes) and how                                              | 8                     |
|                                                      | 11b | If relevant, description of the similarity of interventions                                                                                                                           | 9-10                  |
| Statistical methods                                  | 12  | Methods used to address each pilot trial objective whether qualitative or quantitative                                                                                                | 10-11                 |
| <b>Results</b>                                       |     |                                                                                                                                                                                       |                       |
| Participant flow (a diagram is strongly recommended) | 13a | For each group, the numbers of participants who were approached and/or assessed for eligibility, randomly assigned, received intended treatment, and were assessed for each objective | Figure 3              |
|                                                      | 13b | For each group, losses and exclusions after randomisation, together with reasons                                                                                                      | Figure 3              |
| Recruitment                                          | 14a | Dates defining the periods of recruitment and follow-up                                                                                                                               | Figure 2, page 10-11  |
|                                                      | 14b | Why the pilot trial ended or was stopped                                                                                                                                              | 11                    |
| Baseline data                                        | 15  | A table showing baseline demographic and clinical characteristics for each group                                                                                                      | Table 1               |
| Numbers analysed                                     | 16  | For each objective, number of participants (denominator) included in each analysis. If relevant, these numbers should be by randomised group                                          | Figure 3              |
| Outcomes and estimation                              | 17  | For each objective, results including expressions of uncertainty (such as 95% confidence interval) for any estimates. If relevant, these results should be by randomised group        | Supplemental Figure 1 |
| Ancillary analyses                                   | 18  | Results of any other analyses performed that could be used to inform the future definitive trial                                                                                      | Table 2               |
| Harms                                                | 19  | All important harms or unintended effects in each group (for specific guidance see CONSORT for harms)                                                                                 | 13-14                 |
|                                                      | 19a | If relevant, other important unintended consequences                                                                                                                                  | n/a                   |
| <b>Discussion</b>                                    |     |                                                                                                                                                                                       |                       |
| Limitations                                          | 20  | Pilot trial limitations, addressing sources of potential bias and remaining uncertainty about feasibility                                                                             | 15-18                 |
| Generalisability                                     | 21  | Generalisability (applicability) of pilot trial methods and findings to future definitive trial and other studies                                                                     | 15-18                 |
| Interpretation                                       | 22  | Interpretation consistent with pilot trial objectives and findings, balancing potential benefits and harms, and considering other relevant evidence                                   | 18                    |
|                                                      | 22a | Implications for progression from pilot to future definitive trial, including any proposed amendments                                                                                 | 15-18                 |
| <b>Other information</b>                             |     |                                                                                                                                                                                       |                       |
| Registration                                         | 23  | Registration number for pilot trial and name of trial registry                                                                                                                        | 3                     |
| Protocol                                             | 24  | Where the pilot trial protocol can be accessed, if available                                                                                                                          | n/a                   |
| Funding                                              | 25  | Sources of funding and other support (such as supply of drugs), role of funders                                                                                                       | 3                     |
|                                                      | 26  | Ethical approval or approval by research review committee, confirmed with reference number                                                                                            | 7                     |

1  
2  
3  
4  
5  
6  
7  
8  
9  
10  
11  
12  
13  
14  
15  
16  
17  
18  
19  
20  
21  
22  
23  
24  
25  
26  
27  
28  
29  
30  
31  
32  
33  
34  
35  
36  
37  
38  
39  
40  
41  
42  
43  
44  
45  
46

Citation: Eldridge SM, Chan CL, Campbell MJ, Bond CM, Hopewell S, Thabane L, et al. CONSORT 2010 statement: extension to randomised pilot and feasibility trials. *BMJ*. 2016;355.  
\*We strongly recommend reading this statement in conjunction with the CONSORT 2010, extension to randomised pilot and feasibility trials, Explanation and Elaboration for important clarifications on all the items. If relevant, we also recommend reading CONSORT extensions for cluster randomised trials, non-inferiority and equivalence trials, non-pharmacological treatments, herbal interventions, and pragmatic trials. Additional extensions are forthcoming: for those and for up to date references relevant to this checklist, see [www.consort-statement.org](http://www.consort-statement.org).

For peer review only

# BMJ Open

## Nature vs. urban hiking for Veterans with posttraumatic stress disorder: a pilot randomized trial conducted in the Pacific Northwest United States

|                                 |                                                                                                                                                                                                                                                                                                                                                                                                                                                                                                                                                                                                                                                                                                                                                                                                                                                                             |
|---------------------------------|-----------------------------------------------------------------------------------------------------------------------------------------------------------------------------------------------------------------------------------------------------------------------------------------------------------------------------------------------------------------------------------------------------------------------------------------------------------------------------------------------------------------------------------------------------------------------------------------------------------------------------------------------------------------------------------------------------------------------------------------------------------------------------------------------------------------------------------------------------------------------------|
| Journal:                        | <i>BMJ Open</i>                                                                                                                                                                                                                                                                                                                                                                                                                                                                                                                                                                                                                                                                                                                                                                                                                                                             |
| Manuscript ID                   | bmjopen-2021-051885.R1                                                                                                                                                                                                                                                                                                                                                                                                                                                                                                                                                                                                                                                                                                                                                                                                                                                      |
| Article Type:                   | Original research                                                                                                                                                                                                                                                                                                                                                                                                                                                                                                                                                                                                                                                                                                                                                                                                                                                           |
| Date Submitted by the Author:   | 21-Jul-2021                                                                                                                                                                                                                                                                                                                                                                                                                                                                                                                                                                                                                                                                                                                                                                                                                                                                 |
| Complete List of Authors:       | Littman, Alyson; VA Puget Sound Health Care System, Seattle Epidemiologic Research and Information System and Seattle-Denver Center of Innovation; University of Washington, Epidemiology<br>Bratman, Gregory N; University of Washington<br>Lehavot, Keren; University of Washington School of Public Health, Department of Veterans Affairs Puget Sound Health Care System<br>Engel, Charles C; University of Washington School of Public Health, Department of Veterans Affairs Puget Sound Health Care System<br>Fortney, John ; University of Washington<br>Peterson, Alexander; VA Puget Sound Health Care System, Seattle Epidemiologic Research and Information Center<br>Jones, Alex; Outdoors for All<br>Klassen, Carolyn; Seattle Epidemiologic Research and Information Center<br>Brandon, Josh; Spirit of America<br>Frumkin, Howard; University of Washington |
| <b>Primary Subject Heading</b>: | Mental health                                                                                                                                                                                                                                                                                                                                                                                                                                                                                                                                                                                                                                                                                                                                                                                                                                                               |
| Secondary Subject Heading:      | Complementary medicine, Epidemiology, Public health, Qualitative research, Sports and exercise medicine                                                                                                                                                                                                                                                                                                                                                                                                                                                                                                                                                                                                                                                                                                                                                                     |
| Keywords:                       | Adult psychiatry < PSYCHIATRY, TRAUMA MANAGEMENT, COMPLEMENTARY MEDICINE, PUBLIC HEALTH                                                                                                                                                                                                                                                                                                                                                                                                                                                                                                                                                                                                                                                                                                                                                                                     |
|                                 |                                                                                                                                                                                                                                                                                                                                                                                                                                                                                                                                                                                                                                                                                                                                                                                                                                                                             |

SCHOLARONE™  
Manuscripts





I, the Submitting Author has the right to grant and does grant on behalf of all authors of the Work (as defined in the below author licence), an exclusive licence and/or a non-exclusive licence for contributions from authors who are: i) UK Crown employees; ii) where BMJ has agreed a CC-BY licence shall apply, and/or iii) in accordance with the terms applicable for US Federal Government officers or employees acting as part of their official duties; on a worldwide, perpetual, irrevocable, royalty-free basis to BMJ Publishing Group Ltd ("BMJ") its licensees and where the relevant Journal is co-owned by BMJ to the co-owners of the Journal, to publish the Work in this journal and any other BMJ products and to exploit all rights, as set out in our [licence](#).

The Submitting Author accepts and understands that any supply made under these terms is made by BMJ to the Submitting Author unless you are acting as an employee on behalf of your employer or a postgraduate student of an affiliated institution which is paying any applicable article publishing charge ("APC") for Open Access articles. Where the Submitting Author wishes to make the Work available on an Open Access basis (and intends to pay the relevant APC), the terms of reuse of such Open Access shall be governed by a Creative Commons licence – details of these licences and which [Creative Commons](#) licence will apply to this Work are set out in our licence referred to above.

Other than as permitted in any relevant BMJ Author's Self Archiving Policies, I confirm this Work has not been accepted for publication elsewhere, is not being considered for publication elsewhere and does not duplicate material already published. I confirm all authors consent to publication of this Work and authorise the granting of this licence.

1  
2  
3 1 **Nature vs. urban hiking for Veterans with posttraumatic stress disorder: a pilot randomized trial conducted in**  
4  
5 2 **the Pacific Northwest United States**

6  
7 3 Alyson J Littman<sup>1,2,3\*</sup>, Gregory N Bratman<sup>4,10</sup>, Keren Lehavot<sup>3,6,7</sup>, Charles C Engel<sup>3,6</sup>, John C Fortney<sup>3,5,6</sup>, Alexander  
8  
9  
10 4 Peterson<sup>2</sup>, Alex Jones<sup>8</sup>, Carolyn Klassen<sup>2</sup>, Josh Brandon<sup>9</sup>, Howard Frumkin<sup>10</sup>

11  
12 5  
13  
14 6 <sup>1</sup> Seattle Epidemiologic Research and Information Center, Department of Veterans Affairs Puget Sound Health  
15  
16  
17 7 Care System, Seattle, WA

18  
19 8 <sup>2</sup> Department of Epidemiology, School of Public Health, University of Washington, Seattle, WA

20  
21 9 <sup>3</sup> Seattle-Denver Center of Innovation for Veteran-Centered and Value-Driven Care, Department of Veterans  
22  
23 10 Affairs Puget Sound Health Care System, Seattle, WA

24  
25  
26 11 <sup>4</sup> School of Environmental and Forest Sciences, University of Washington, Seattle, WA

27  
28 12 <sup>5</sup> Department of Psychiatry and Behavioral Science, University of Washington, Seattle, WA

29  
30 13 <sup>6</sup> Department of Health Services, University of Washington School of Public Health, Seattle, WA

31  
32 14 <sup>8</sup> Outdoors for All, Seattle, WA

33  
34 15 <sup>9</sup> Spirit of America

35  
36  
37 16 <sup>10</sup> Department of Environmental and Occupational Health Sciences, School of Public Health, University of  
38  
39 17 Washington, Seattle, WA

40  
41 18  
42  
43 19 \* Corresponding author

44  
45  
46 20 Email: alyson@uw.edu

47  
48  
49 21

50  
51 22

52  
53 23

54  
55 24

56  
57

58

59

60

1  
2  
3 **25 ABSTRACT**  
4

5 **26 Objectives:** To evaluate feasibility and acceptability of a group-based nature recreation intervention (nature  
6  
7 hiking) and control condition (urban hiking) for military Veterans with post-traumatic stress disorder (PTSD).  
8 **27**

9  
10 **28 Design and setting:** A pilot randomized controlled trial conducted in the U.S. Pacific Northwest.  
11

12 **29 Participants:** Veterans with PTSD due to any cause.  
13

14 **30 Interventions:** Twenty-six participants were randomized to a 12-week intervention involving either six nature  
15  
16 hikes (n=13) or six urban hikes (n=13).  
17 **31**

18  
19 **32 Primary and secondary outcome measures:** Feasibility was assessed based on recruitment, retention and  
20  
21 attendance. Questionnaires and post-intervention qualitative interviews were conducted to explore intervention  
22  
23 acceptability. Questionnaires assessing acceptability and outcomes planned for the future trial (e.g., PTSD  
24  
25 symptoms) were collected at baseline, 6-, 12- (immediately after the final hike) and 24-weeks follow-up.  
26 **35**

27  
28 **36 Results:** Of 415 people assessed for eligibility/interest, 97 were interested and passed preliminary eligibility  
29  
30 screening, and 26 were randomized. Mean completion of all questionnaires was 91% among those in the nature  
31  
32 hiking group and 68% in those in the urban hiking group. Over the course of the intervention, participants in the  
33  
34 nature and urban groups attended an average of 56% and 58%, respectively, of scheduled hikes. Acceptability of  
35  
36 both urban and nature hikes was high; over 70% reported a positive rating (i.e., good/excellent) for the hike  
37  
38 locations, distance, and pace. Median PTSD symptom scores (PTSD Checklist-5) improved more at 12- and 24-  
39  
40 weeks among those in the nature vs. urban hiking group.  
41  
42 **42**

43  
44 **43 Conclusions:** This pilot study largely confirmed the feasibility and acceptability of nature hiking as a potential  
45  
46 treatment for Veterans with PTSD. Adaptations will be needed to improve recruitment and increase hike  
47  
48 attendance for a future randomized controlled trial to effectively test and isolate the ways in which nature  
49  
50 contact, physical activity, and social support conferred by the group impact outcomes.  
51 **46**

52 **47 Trial registration:** Clinicaltrials.gov (NCT03997344)  
53  
54  
55 **48**  
56  
57  
58  
59  
60

1  
2  
3 49 **Key words:** posttraumatic stress disorder, Veterans, nature, green exercise, pilot randomized controlled trial

4  
5 50

6  
7  
8 51 **Strengths and limitations of the study**

- 9  
10 52 • The intervention, nature hiking (green exercise), is attractive because it has the potential to be a low  
11  
12 53 stigma PTSD treatment option with physical and mental health benefits.  
13  
14 54 • By using group-based urban hiking as a comparison group to control for the effects of physical activity  
15  
16  
17 55 and social cohesion (present in both interventions), this study was designed to isolate benefits  
18  
19 56 specifically due to the environment (which differed between the interventions).  
20  
21 57 • We used population-based recruitment methods to enroll a representative sample of Veterans with  
22  
23 58 PTSD.  
24  
25  
26 59 • Because of its small size and focus on feasibility, the study was not large enough to determine the  
27  
28 60 effectiveness of nature hiking on outcomes.  
29

30 61

31  
32 62 **Funding:** This work was funded by Recreational Equipment, Inc. (REI; Award/Grant number is not applicable)  
33  
34  
35 63 and supported by equipment and outfitting contributions from Outdoor Research.  
36  
37 64

38  
39 65 **Competing interests:** The authors have no competing interests to report.  
40

41 66 **Data availability statement:** Data are available upon reasonable request. Due to legal and ethical restrictions,  
42  
43  
44 67 we are unable to share data publicly because the data contain potentially identifying and/or sensitive patient  
45  
46 68 information. Subject to IRB approval, de-identified data will be released to a local Department of Veterans  
47  
48 69 Affairs (VA) Puget Sound Health Care System and/or national VA research data repository for release to non-VA  
49  
50 70 protocols. The VA research data repository administrator will be responsible for reviewing and responding to  
51  
52 71 requests to release data to non-VA requestors. A data use agreement compliant with Veterans Health  
53  
54  
55 72 Administration Handbooks 1200.12 and 1605.1 will be required between Veterans Health Administration and  
56  
57  
58  
59

1  
2  
3  
4  
5  
6  
7  
8  
9  
10  
11  
12  
13  
14  
15  
16  
17  
18  
19  
20  
21  
22  
23  
24  
25  
26  
27  
28  
29  
30  
31  
32  
33  
34  
35  
36  
37  
38  
39  
40  
41  
42  
43  
44  
45  
46  
47  
48  
49  
50  
51  
52  
53  
54  
55  
56  
57  
58  
59  
60

73 the requestor. Review and approval by VA privacy officer is required prior to disclosure. Data access requests  
74 will be reviewed by the IRB of the VA Puget Sound Health Care System (contact via Dr. Littman –  
75 alyson.littman@va.gov), via mail address: 1660 S Columbian Way, Building 101 – 5W41, Seattle, WA 98108.

For peer review only

## 76 Introduction

77 Posttraumatic Stress Disorder (PTSD) is a common, chronic mental health condition that affects up to 30% of  
78 military Veterans and is frequently comorbid with anxiety, depression, and substance misuse (1–3). PTSD  
79 increases the risk of suicide as well as obesity, physical inactivity, and cardiovascular and metabolic disorders (1–  
80 12). Clinical practice guidelines recommend treatment with several evidence-based psychotherapies and  
81 medications (13), but many Veterans who need PTSD treatment do not receive it (14). Barriers to obtaining  
82 treatment include concerns about medication side effects, desire for self-management approaches, stigma  
83 about receiving mental health care, and a lack of confidence in mental health treatment in general (14–17).  
84 These and other factors adversely impact engagement, contributing to low initiation of (14,18–22) and high  
85 drop-out rates from treatment (20,23,24). Identifying a wider range of approaches that are acceptable and  
86 effective is key to reducing the burden PTSD places on individuals and their communities.

87  
88 There is growing interest in nature contact as a potential therapy for Veterans with PTSD and robust evidence  
89 that nature contact improves physical and psychological health, among healthy individuals and those with  
90 mental health disorders (25). Nature contact has been shown to increase subjective well-being; decrease stress,  
91 anxiety, depression, and negative affect; and promote adaptive shifts in emotion regulation (25,26). Benefits of  
92 nature contact are generally posited to occur based on two theories: Attention Restoration Theory (ART) and  
93 Stress Recovery Theory (SRT) (27,28). ART theorizes that nature contact improves cognitive function through a  
94 replenishment of “directed attention”, a capacity that is overly taxed in urban environments due to the need to  
95 block out distracting stimuli (e.g., noise) to focus on a specific task or cognitive process. This depleted attention  
96 capacity can be restored in natural environments through the engagement of “soft fascination”, with  
97 implications for both cognitive and emotional well-being. SRT is based on psycho-evolutionary principles, and  
98 posits that many types of nature exposure enhance psychological well-being through a pre-cognitive, positive

1  
2  
3 99 affective response and activation of the parasympathetic nervous system in ways that reduce stress and  
4  
5 100 sympathetic nervous system arousal (26,29,30).  
6  
7  
8 101  
9  
10 102 Like nature contact, physical activity (PA) is considered to be a promising approach to improve outcomes for  
11  
12 103 individuals with PTSD. PA reduces anxiety and depression and improves stress regulation, sleep, and cognitive  
13  
14 104 functioning in the general population (10,11,31), and in people with PTSD, though only eight studies have  
15  
16 105 involved randomized controlled trial (RCT) designs (4,32–39), and five of the RCTs were pilot studies or included  
17  
18 106 fewer than 30 people (32,33,35,38,39). Furthermore, we are aware of only one RCT focused on Veterans (39).  
19  
20  
21 107 Group-based PA interventions may be particularly well-suited for military Veterans, due to 1) proportionally  
22  
23 108 higher rates of PTSD among Veterans (40), 2) consistency of PA interventions with values cultivated during  
24  
25 109 military service, and 3) benefits of social interaction with Veteran peers (41). To our knowledge, no PA  
26  
27 110 interventions in those with PTSD investigated the PA environment as a component of treatment. This is an  
28  
29 111 important omission, because the environment in which PA takes place may play an important role in its benefits  
30  
31 112 (42).  
32  
33  
34  
35 113  
36  
37  
38 114 Green exercise, defined as activity that takes place in natural environments, is a burgeoning area of research  
39  
40 115 (43–48). A number of studies have documented benefits from green exercise in Veteran populations and among  
41  
42 116 individuals with PTSD (45–55). The specific interventions studied (from care farming to river rafting),  
43  
44  
45 117 dose/duration, and inclusion of additional, explicit therapeutic components vary substantially among studies. A  
46  
47 118 2019 systematic review that examined evidence for the proposed additive effects of exercise in the presence of  
48  
49 119 nature observed some benefits (e.g., lower perceived exertion and enjoyment), the authors concluded that  
50  
51 120 there was a high risk of bias across trials and an overall low quality of evidence (44). Thus, uncertainty about the  
52  
53  
54 121 duration and impacts of green exercise remains due to methodological issues and because most interventional  
55  
56 122 studies tested only a single bout of exercise (43,44). Furthermore, in the studies including Veterans, important  
57  
58  
59  
60

1  
2  
3 123 limitations include low retention for follow-up, absence of control groups, and insufficient statistical power (52–  
4  
5 124 58).

6  
7  
8  
9 125  
10  
11 126 In addition to nature contact and PA, a third important component of many green exercise interventions  
12  
13 127 includes a group component. Some recent research suggests that increased social cohesion and connectedness  
14  
15 128 may mediate benefits of green exercise (59), but findings are inconsistent (60). Social support forged through  
16  
17  
18 129 group activity could be particularly relevant for Veterans, as camaraderie and solidarity are critical components  
19  
20 130 of military culture, and ones that are frequently lost in the return to civilian life (61). Social support is associated  
21  
22 131 with reduced PTSD symptoms and improved treatment response (62) and may directly impact stress response  
23  
24 132 by increasing personal resources (63), and/or may indirectly impact PTSD symptom severity and response to  
25  
26  
27 133 treatment through buffering the potentially harmful impacts of stressful events (64).  
28

29 134  
30  
31 135 Adequately powered studies involving ongoing green exercise that are designed to distinguish between benefits  
32  
33 136 due to PA and those due to the physical (e.g., nature) and social (e.g., group cohesion) environment are needed.  
34  
35  
36 137 Thus, our goal was to design and conduct a pilot study to test the feasibility and acceptability of a green exercise  
37  
38 138 intervention for PTSD symptoms in military Veterans, regardless of PTSD etiology. The intervention (nature  
39  
40 139 hiking) and the active control (urban hiking) were group-based and involved similar amounts of PA, to ensure  
41  
42 140 control of the potential benefits of the group-based social support and of PA. Figure 1 depicts our conceptual  
43  
44  
45 141 model. This paper describes the results of the initial pilot study designed to emulate important elements of the  
46  
47 142 future envisioned full-scale randomized trial.  
48

## 49 143 50 51 144 **Methods**

52  
53  
54 145  
55  
56 146  
57  
58  
59  
60



1  
2  
3  
4  
5  
6  
7  
8  
9  
10  
11  
12  
13  
14  
15  
16  
17  
18  
19  
20  
21  
22  
23  
24  
25  
26  
27  
28  
29  
30  
31  
32  
33  
34  
35  
36  
37  
38  
39  
40  
41  
42  
43  
44  
45  
46  
47  
48  
49  
50  
51  
52  
53  
54  
55  
56  
57  
58  
59  
60

### 147 Identification and recruitment of participants

148 We used active and passive methods to identify and recruit Veterans to participate. While receiving care at a  
149 Department of Veterans Affairs (VA) health care facility was not an inclusion criterion, we used VA electronic  
150 medical records as a key source to identify potentially eligible Veterans. We identified VA enrollees (identified  
151 using electronic medical records) with at least one encounter with a diagnosis of PTSD in the prior two years; a  
152 zip code in one of three Seattle-Tacoma area counties (King, Snohomish, and Pierce); no hospitalizations in the  
153 prior 3 months; and no diagnoses of schizophrenia, bipolar disorder, or other psychotic disorder. We randomly  
154 selected 1001 individuals who met these criteria from a total of approximately 7000 and mailed them a letter  
155 informing them about the study and inviting them to participate. We followed the mailing with up to three  
156 phone calls until we met recruitment targets, or the recruitment period ended, whichever happened first. We  
157 also placed study recruitment flyers in clinics in the VA Puget Sound and mailed flyers to four local organizations  
158 and clinics serving Veterans. Individuals who expressed an interest were mailed an invitation letter.

160 We initially screened all Veterans who expressed an interest in participating for eligibility over the phone;  
161 inclusion criteria assessed included a history of PTSD, ability/willingness to comply with study procedures (e.g.,  
162 complete questionnaires, wear and sync an activity monitor, drive to hikes, and walk at least 2 hours at an  
163 easy/moderate pace over uneven terrain). Exclusion criteria assessed included a diagnosis of schizophrenia,  
164 bipolar disorder, or other psychotic disorder; hospital admission in the prior 3 months, and inability to perform  
165 unsupervised physical activity based on the Physical Activity Readiness Questionnaire (65). We invited those  
166 who passed all criteria except for the Physical Activity Readiness Questionnaire to obtain approval to participate  
167 from their primary care provider. Though some of this information was available in VA medical records, because  
168 we also included Veterans who did not have VA medical records, we employed methods that allowed us to  
169 evaluate eligibility without medical record access. Those who passed initial screening were mailed consent forms  
170 and given a link to complete a more extensive screening questionnaire online. Via the online screening

1  
2  
3 171 questionnaire, PTSD symptoms, drug use, alcohol misuse, and suicidality were assessed. PTSD was determined  
4  
5 172 based on a PTSD-checklist-5 (66) score  $\geq 33$ . We excluded those with drug abuse in past year (Drug Abuse  
6  
7  
8 173 Screening Test-10 (67) score  $< 3$ ); alcohol disorder/dependence (current/past year; Alcohol Use Disorders  
9  
10 174 Identification Test-10 (68) score  $> 16$ ); and moderate/severe suicidality (past month; MINI Suicidality module (69)  
11  
12 175 score  $\geq 5$ ). Those who were eligible and returned signed consents were considered enrolled in the study.  
13

### 14 176 15 16 17 177 Study design

18  
19 178 We conducted a two-arm randomized controlled feasibility trial. The two interventions were group nature and  
20  
21 179 group urban hiking. The random 1:1 allocation sequence was generated using simple randomization in random  
22  
23 180 blocks of 2, 4 and 6. Randomization assignments were placed in opaque sequentially numbered envelopes. Once  
24  
25  
26 181 an individual was determined to be eligible, the study coordinator selected the next envelope to determine the  
27  
28 182 individual's group assignment. We did not blind participants, the study coordinator, or the study statistician to  
29  
30 183 group assignment. This study was registered at Clinicaltrials.gov (NCT03997344). Figure 2 presents an overview  
31  
32 184 of the study, including timing of assessments.  
33

### 34 185 35 36 37 186 Description of hike locations and amenities

38  
39 187 The criteria used to select the hike locations (which applied to both nature and urban hikes) included duration,  
40  
41 188 elevation change, availability of facilities (e.g., toilets and water), distance from participants' homes, and access  
42  
43  
44 189 to parking. Nature hikes were held in State Parks, National Wildlife Refuges, and Natural Resources Conservation  
45  
46 190 areas in the US Pacific Northwest. The nature hikes were in forest habitat, including old growth forest, saltwater  
47  
48 191 shoreline, waterfalls, and alpine lakes. Elevations ranged from sea level to 2200 feet above sea level. Urban  
49  
50 192 hikes were held in primarily built environments, avoiding urban parks or primarily residential neighborhoods  
51  
52 193 with substantial greenery or water features. Urban hikes comprised areas that included sports stadiums, urban  
53  
54  
55 194 art, and retail establishments and were mainly on sidewalks rather than separated bike/pedestrian paths/rail-

1  
2  
3 195 trails. It was not feasible to match nature and urban hikes on elevation change; instead, we aimed to have  
4  
5 196 similar hike durations to match total exertion. Generally, nature hikes involved somewhat shorter distances but  
6  
7  
8 197 included more elevation gain/loss.  
9

10 198

11  
12 199 Hiking intervention  
13

14 200 A total of 6 hikes over 12 weeks (one every other week) were offered between August and October 2019. We  
15  
16  
17 201 chose to offer 6 hikes (vs. more or fewer) because this number was thought to be feasible and would be  
18  
19 202 sufficient to assess feasibility and acceptability. The standard structure for hikes was: 1) “ice breakers” (short,  
20  
21 203 guided conversations), 2) overview of the planned hike, including distance, unique features, and planned stops,  
22  
23 204 3) hike, and 4) post-hike debrief and administration of questionnaires. There were no additional  
24  
25  
26 205 group/therapeutic activities.  
27

28 206

29  
30 207 Hike durations increased gradually to account for anticipated increases in participants’ physical fitness. Initial  
31  
32 208 hikes were 60-90 minutes (2-3 miles), and later hikes were 2-3 hours (5-6 miles). To ensure safety and inclusion,  
33  
34  
35 209 one hike leader was in sight and hearing of the first participant and a second leader accompanied the last  
36  
37 210 participant. The group stopped at least every 30 minutes to keep everyone together and offer opportunities to  
38  
39 211 rest, regroup, and inquire about and address any issues or concerns arising since the last check-in.  
40

41 212

42  
43 213 The same hike leaders, who were non-clinicians, led both nature and urban hikes to control for hike-leader  
44  
45  
46 214 effects. On every hike, at least one of the leaders was a woman. Leaders were experienced outdoor educators  
47  
48 215 who were employed by a Seattle-based outdoor organization that provides outdoor recreation activities for  
49  
50 216 people with disabilities. While the leaders were not Veterans, the organization received grants from the VA as  
51  
52 217 part of the Adaptive Sports Program (70) and had previously led programs for Veterans. Leaders were trained to  
53

54

55

56

57

58

59

60

1  
2  
3 218 handle physical and mental health emergencies by the PIs (AJL and GNB) and a co-I who is a licensed clinical  
4  
5 219 psychologist (KL). AJL and GNB supervised the hike leaders during the study.  
6  
7  
8 220

9  
10 221 To reduce barriers to attendance, a \$35 incentive was provided to defray parking costs. We provided a rain  
11  
12 222 jacket and technical shirt as well as well as an activity monitor (Garmin vivosmart 4) at the participant's first  
13  
14 223 hike.  
15  
16  
17 224

### 18 Outcomes

19 225  
20  
21 226 The primary outcomes of interest were feasibility and acceptability. **Feasibility** was assessed based on  
22  
23 227 recruitment statistics (the proportion of individuals who were contacted, eligible, and enrolled, as well as  
24  
25 228 reasons for ineligibility), retention (questionnaire completion), hike attendance, and safety (e.g., adverse  
26  
27 229 events). We aimed to recruit 36-45 participants (12-15 people allocated to each of the three groups - nature  
28  
29 230 hiking, urban hiking, and a no-hiking control group) and complete enrollment by July 2019 (approximately 3  
30  
31 231 months after recruitment began) due to concerns about weather for hikes later in the fall. Because of lower-  
32  
33 232 than-anticipated recruitment numbers, in late June, we decided to eliminate the no-hiking control group. At this  
34  
35 233 time, only one person was randomized to the no-hiking control group and informed of their group assignment;  
36  
37 234 that person was re-randomized after this decision was made. The target for retention and attendance was 70%.  
38  
39 235  
40

41 236 To assess **acceptability**, in the 6- and 12-week questionnaires, we included questions about distance, pace,  
42  
43 237 terrain, and locations of hikes and pre-hike and trailhead information and communication. These questions were  
44  
45 238 created for the study and asked participants to rate their perceptions on a 5- or 6-point Likert scale (e.g., from  
46  
47 239 very poor to excellent). We also included open-ended questions for participants to report what they thought  
48  
49 240 went well and what could have been better. Additionally, after the final hike, the lead author (AJL) conducted  
50  
51 241 semi-structured telephone interviews, with a goal to interview 10-15 participants. To include a range of  
52  
53  
54  
55  
56  
57  
58  
59  
60

1  
2  
3 242 perspectives, we purposively sampled participants from both arms, aimed to include men and women, and  
4  
5 243 participants who varied in terms of hike attendance. Questions inquired about participants' impressions of the  
6  
7  
8 244 hikes, including difficulty, location, length of time, distance from home, hike leaders, and reasons hikes were  
9  
10 245 missed (if applicable); study communications; enrollment process; assessments; and other  
11  
12 246 thoughts/impressions.

13  
14 247  
15  
16  
17 248 Determination of **efficacy** was not a goal of this pilot RCT. The primary outcome of the future planned study is  
18  
19 249 PTSD symptoms, assessed by the PTSD-Checklist-5 (PCL-5), a 20-item instrument that assesses PTSD symptoms  
20  
21 250 in the past month (range 0 to 80, with higher scores indicating greater symptom severity). Other outcome  
22  
23 251 measures of interest for the future planned study, which are detailed in Supplemental Table 1, include quality of  
24  
25  
26 252 life (71), positive and negative affect (72,73), sleep (74), rumination (75), and cognitive reappraisal (76).

27  
28 253  
29  
30 254 Baseline and follow-up assessments

31  
32 255 We conducted assessments online using commercial software (QuestionPro) at baseline (before hikes began),  
33  
34  
35 256 each week after the first hike for 12 weeks (after the 6<sup>th</sup> hike), and then at week 24; questionnaires completed  
36  
37 257 immediately after the hikes were completed on paper. See Figure 2 for an overview and Supplemental Table 1  
38  
39 258 for measures at each time point. Questionnaires at weeks 6, 12, and 24 took approximately 30 minutes to  
40  
41 259 complete. Questionnaires administered at weeks 1-5 and 7-11 included fewer measures and/or shortened  
42  
43  
44 260 versions and took 5-10 minutes to complete. Participants received gift cards worth \$10 for completing  
45  
46 261 questionnaires in weeks 1-5 and 7-11, \$20 for the 6-week questionnaire, and \$50 for the 12- and 24-week  
47  
48 262 questionnaires. In addition to questionnaires, to obtain objective information about PA (a potential mechanism  
49  
50 263 of benefit, which we would want to measure precisely in a future study), we asked participants to wear a wrist  
51  
52 264 worn-activity monitor (Garmin vivosmart 4) every day, for at least 10 hours per day, for the first 12 weeks of the  
53  
54  
55 265 study. No incentives were provided for wearing or synching the watch.

1  
2  
3 266

4  
5 267 Data analysis

6  
7  
8 268 *Quantitative analysis*

9  
10 269 The primary purpose of the extensive data collection was to evaluate feasibility of data collection rather than to  
11  
12 270 estimate effect sizes because estimating effect sizes from small pilot studies is inherently imprecise (77). Thus,  
13  
14 271 instead of conducting hypothesis tests for which we were underpowered, we present descriptive statistics (e.g.,  
15  
16  
17 272 medians and interquartile ranges) for the primary outcome (PCL-5) only.  
18

19 273  
20  
21 274 *Qualitative analysis*

22  
23 275 All interviews were recorded, and the interviewer took notes during interviews. For both the comments shared  
24  
25  
26 276 via open-ended questions on the questionnaire and comments shared orally during the interviews, we  
27  
28 277 conducted inductive content analysis, which involves open coding of data, organizing codes and data into  
29  
30 278 categories, and comparing data across participants to identify patterns and themes in the data (78).  
31

32 279  
33  
34  
35 280 Patient and public involvement

36  
37 281 Patients were involved in the design and conduct of this study. The study question and design were informed by  
38  
39 282 a Veteran with PTSD who served as a co-investigator. The design and messaging for this pilot study were also  
40  
41 283 informed by a focus group of patients/Veterans who participated in a prior unpublished feasibility study.  
42

43 284  
44  
45  
46 285 Ethics approval

47  
48 286 This study was approved by the institutional review boards at the VA Puget Sound Health Care System (MIRB  
49  
50 287 01738) and the University of Washington (6951).  
51

52 288  
53  
54  
55 289 **Results**

1  
2  
3  
4  
5  
6  
7  
8  
9  
10  
11  
12  
13  
14  
15  
16  
17  
18  
19  
20  
21  
22  
23  
24  
25  
26  
27  
28  
29  
30  
31  
32  
33  
34  
35  
36  
37  
38  
39  
40  
41  
42  
43  
44  
45  
46  
47  
48  
49  
50  
51  
52  
53  
54  
55  
56  
57  
58  
59  
60290 *Feasibility*291 *Recruitment statistics*

Recruitment took place between April and August 2019 (16 weeks total). Of the 1001 patients mailed an invitation letter, we were unable to assess interest or eligibility in 586 (because they did not respond to the mailings and/or answer the phone when called; see Figure 3 for CONSORT diagram). Of the 415 with whom we made contact, 159 were not interested, 102 had health conditions that limited their walking/hiking, 36 had time conflicts (e.g., work or church on Sundays or travel that would prevent participation), and 37 had other reasons that they were unable to participate (e.g., moving out of the area, did not have PTSD, etc.). Of the 97 (81 from letters + 16 from passive recruitment) interested who passed initial screening, 48 completed the online screening questionnaire. Twenty individuals were not eligible, 2 decided that they did not wish to participate, and 26 were eligible and randomized. Of the 20 who were not eligible, 13 were ineligible because of a moderate/high risk of suicide or skipping the question on suicidality, and 6 did not meet the threshold for PTSD. Compared to those contacted and not randomized, a greater proportion of those randomized were women (27% randomized vs. 15% of those contacted), white (73% vs. 63%), and Hispanic (8% vs. 6%). Additionally, those who were randomized were younger (mean age = 47, range 25-65) than those not randomized (mean age = 52, range: 21-95).

Table 1 presents characteristics of Veterans who were randomized and includes self-reported race/ethnicity, which differed from race/ethnicity in the electronic medical record (reported above). Specifically, 42% of those randomized self-reported being white, whereas the electronic medical record data indicated that 73% were white. Thirty percent had a college degree or more. Less than half worked full time and 46% had 100% VA service-connected disability, indicating severe impairment in ability to work. Nearly two-thirds of participants had served in combat and 68% had depressive symptoms based on the PHQ-8. Based on self-report, nearly 70% met or exceeded PA guidelines of at least 75 minutes per week of vigorous-intensity activity or 150 minutes per

1  
2  
3 314 week of moderate-intensity activity, or an equivalent combination of the two. At baseline (prior to study  
4  
5 315 initiation), 81% of participants reported hiking at least one time and 27% completed 7 or more hikes in the prior  
6  
7  
8 316 year.

9  
10 317  
11  
12 318 *Retention (questionnaire completion)*

13  
14 319 Mean completion of all questionnaires was 91% in the nature hiking group and 68% in the urban hiking group.  
15  
16  
17 320 Completion rates were similar for the shorter weekly questionnaires and the longer questionnaires.

18  
19 321  
20  
21 322 *Hike attendance*

22  
23 323 Over the course of the intervention, participants in the nature and urban groups attended an average of 56%  
24  
25 324 and 58%, respectively, of scheduled hikes. In the nature group, one person attended no hikes, four (31%)  
26  
27  
28 325 attended 1-2 hikes, one attended 3 hikes, and seven (54%) attended 4-6 hikes. In the urban group, one person  
29  
30 326 attended no hikes, four (31%) attended 1-2 hikes, no one attended only 3 hikes, and eight (62%) attended 4-6  
31  
32 327 hikes. Attendance was lower among women in the nature group (n=5, mean: 43%) than among women in the  
33  
34 328 urban group (n=2, 67%), whereas among men, hike attendance was similar in the two groups (65% vs. 56%).  
35  
36  
37 329 Common reasons for missing hikes included work, childcare, and prior plans.

38  
39 330  
40  
41 331 *Safety/Adverse events*

42  
43 332 One participant in the urban hiking arm reported increased anxiety/PTSD symptoms in connection with hiking in  
44  
45  
46 333 the urban environment and withdrew from the study.

47  
48 334  
49  
50 335 *Acceptability*

51  
52 336 *Quantitative findings*



1  
2  
3 337 Acceptability of both the urban and nature hikes was high. Over 70% reported a positive rating (i.e., good or  
4  
5 338 excellent vs. very poor/inadequate, inadequate, or adequate) for the hike locations, distance, and pace.  
6  
7  
8 339 Additionally, on average, pre-hike information, pre-hike communication, and trailhead communication were  
9  
10 340 rated as good to excellent. Scores (minimum=1, maximum=5) were similar in the urban and nature hike groups  
11  
12 341 at 6 weeks, but were lower in the urban hiking arm at 12 weeks (pre-hike information, mean scores: nature=4.4,  
13  
14 342 urban=3.6; pre-hike communication: nature=4.6, urban=3.8; trailhead communication: nature=4.6, urban=4.1)  
15  
16  
17 343

### 18 19 344 *Qualitative findings*

20  
21 345 In response to the open-ended question on the questionnaire (“What went well so far?”), participants shared  
22  
23 346 positive comments such as “This group seems to mesh really well”, “all expectations were exceeded”, and “good  
24  
25 347 planning, leadership, and execution.” In response to the question, “What do you think we can do better?”,  
26  
27  
28 348 suggestions included having regional groups, closer hikes or paying for gas; weekly (instead of every other week)  
29  
30 349 hikes; more team building and opportunities to socialize with others; and including more women and/or  
31  
32 350 women-only groups. Key themes from the qualitative interviews, which are presented in Table 2, echoed, and  
33  
34  
35 351 elaborated on themes shared in the questionnaire. Most participants felt positively about their experience in the  
36  
37 352 study. As noted above, they liked getting to know other Veterans and having a “mission.” Veterans wanted to  
38  
39 353 find more ways of connecting with one another socially during hikes as well as outside of hikes. Hike logistics  
40  
41 354 (e.g., distance from home) were noted as potential barriers to attendance.  
42  
43  
44 355

### 45 46 356 *Efficacy measures*

47  
48 357 Median PCL-5 scores decreased from baseline to week 12 and remained at the 12-week level at week 24 for  
49  
50 358 those in the nature hiking group (baseline=41, 12-weeks = 32, 24 weeks=31). Among those in the urban hiking  
51  
52 359 group, PCL-5 scores decreased from baseline to 12 weeks but increased nearly back to baseline levels at 24  
53  
54  
55  
56  
57  
58  
59  
60

1  
2  
3 360 weeks (baseline=48, 12-weeks = 43, 24 weeks=47) (Supplemental Figure 1). We did not test the statistical  
4  
5 361 significance of the changes because this pilot study was not designed to answer this question (79).  
6  
7  
8 362

## 10 363 **Discussion**

11  
12 364  
13  
14 365 This study was an important step in establishing feasibility and acceptability and identifying changes to consider  
15  
16  
17 366 in the development of a rigorous, fully-powered study to evaluate the impact of nature hiking on PTSD  
18  
19 367 symptoms. The results of this pilot study generally supported feasibility and acceptability. Participants reported  
20  
21 368 high acceptability, enjoyment, and value, based on quantitative and qualitative data. In both arms, more than half  
22  
23 369 of participants completed most hikes. Qualitative feedback about improving the social component supports the  
24  
25  
26 370 hypothesis that social connection is an important aspect of hikes, indicating a need to further develop the social  
27  
28 371 component and continue to study group interventions like this one. Additionally, the decrease in median scores  
29  
30 372 on the PCL-5 among those in the nature group after the 12-week hiking intervention, and 12 weeks later (week  
31  
32 373 24) is promising. This preliminary finding should be investigated more thoroughly in future, larger-scale versions  
33  
34  
35 374 of our study. The indication that improvements may persist after the conclusion of the intervention is especially  
36  
37 375 compelling given the current unknowns regarding the duration of effects of nature interventions.  
38

39 376  
40  
41 377 Nevertheless, several issues need to be considered related to feasibility and acceptability for the next iteration  
42  
43 378 of this research.  
44  
45

### 48 380 *Feasibility of recruitment*

49  
50 381 We fell short of our goal of recruiting at least 36 people over 4 months. Failing to meet recruitment goals in the  
51  
52 382 planned timeframe is a common problem in randomized controlled trials (80). Barriers to recruitment included  
53  
54  
55 383 unexpected delays, insufficient resources, and an inefficient recruitment process. Regarding delays, we had to  
56  
57  
58  
59

1  
2  
3 384 wait weeks for IRB approval for each proposed modification to recruitment materials/protocol. Regarding  
4  
5 385 resources, we only had 20 hours per week of paid staff time for recruitment. The addition of two volunteers in  
6  
7  
8 386 the final two months helped to accelerate enrollment, but more resources earlier in recruitment would have  
9  
10 387 been necessary to meet our goal.

11  
12 388  
13  
14 389 One contributor to inefficiency in recruitment was the broad, population-based approach we employed for  
15  
16  
17 390 active recruitment. To identify patients for the introductory mailing, the only inclusion criteria were having a  
18  
19 391 single encounter in VA's electronic medical record with a PTSD diagnosis and living in one of three Puget Sound  
20  
21 392 counties. The only exclusion criteria were a diagnosis of schizophrenia, bipolar disorder, or other psychotic  
22  
23 393 disorder. Likely in part because of this broad approach, which did not include upper age limits, approximately  
24  
25  
26 394 one quarter of contacted individuals reported a health condition that impaired their walking. Burdensome study  
27  
28 395 procedures may have also impacted recruitment. About half of interested participants failed to complete the  
29  
30 396 online screening questionnaire and others informed us that they had trouble completing the online  
31  
32 397 questionnaire. Imposing an upper age limit (e.g., 65 years) and restructuring the recruitment process to make it  
33  
34  
35 398 faster and easier for potential participants may be necessary.

36  
37 399  
38  
39 400 Accessibility of the intervention and restrictive eligibility criteria may have also impacted recruitment. In  
40  
41 401 addition to being able to walk over uneven ground for at least two hours, participants also had to be available  
42  
43  
44 402 during the times selected, have low suicide risk, and be free from physical conditions such as high blood  
45  
46 403 pressure (or obtain their primary care provider's permission) among several other criteria. Changing inclusion  
47  
48 404 criteria (e.g., eliminating restrictions related to suicidality) would require tradeoffs related to safety that must be  
49  
50 405 considered carefully.

51  
52 406  
53

54  
55  
56  
57  
58  
59  
60

1  
2  
3 407 Lastly, about 38% (159/415) of those for whom we were able to assess eligibility and interest declined  
4  
5 408 participation. While some of these people may have declined because of the additional burdens of a research  
6  
7  
8 409 study, this statistic indicates that hiking may only appeal to a segment of the population, just as psychotherapy  
9  
10 410 and pharmacotherapy only appeal to subsets of the population (81). Because of differences in treatment  
11  
12 411 preferences, offering options is important, and nature hiking merits consideration so that we can rigorously  
13  
14 412 assess its efficacy.  
15  
16  
17 413

#### 18 19 414 *Retention*

20  
21 415 Retention varied by group and was poorer for the wrist-worn activity monitor than for the questionnaires. The  
22  
23 416 activity monitor had a substantial amount of missing data, which is a common problem for activity monitors  
24  
25 417 (82), and may have been related to the number of technical steps required for setting up the watch and syncing  
26  
27  
28 418 it, as many participants needed additional help to troubleshoot problems. Providing more support to set up the  
29  
30 419 watch and incentives to wear and sync it may help to obtain more complete data. While overall questionnaire  
31  
32 420 completion was high, it was higher in the nature hiking group (91%) than in the urban hiking group (68%).  
33  
34  
35 421 Though the small sample and our inability to conduct interviews with those who did not complete follow-up  
36  
37 422 measures makes inference difficult, the retention differences could be a marker of commitment to the study.  
38  
39 423 Future studies should pay careful attention to marketing the study to ensure that both interventions are  
40  
41 424 perceived as helpful. Enhancing the social aspects of the interventions may help achieve that goal. The  
42  
43 425 difference in incentives provided for questionnaire completion vs. the other aspects of the study may also have  
44  
45  
46 426 played a role in retention for different study aspects. However, many participants shared that they participated  
47  
48 427 to help fellow Veterans, indicating altruistic/intrinsic motivators for participation, reinforcing the importance of  
49  
50 428 understanding drivers of participation, and reducing barriers and enhancing facilitators.  
51  
52 429

#### 53 54 55 430 *Acceptability of the hiking interventions*

1  
2  
3 431 Hike attendance (56%) was lower than our target (70%) and women had lower attendance in the nature hiking  
4  
5 432 group than men. While we were unable to ascertain reasons for missing hikes for each person, some reasons  
6  
7 reported (e.g., other plans, work) were hard to avoid, while others (driving distance to hikes) could be addressed  
8 433  
9  
10 434 in the future by restricting the geographic area of recruitment and hikes and/or organizing small groups at  
11  
12 435 different times to accommodate individuals' schedules. Our study, unfortunately, does not shed light on the  
13  
14 436 optimal hike "dose." We suspect that 8-12 hikes (similar to a standard psychotherapy course) may be optimal  
15  
16  
17 437 for achieving clinically meaningful results. Additional research will be necessary to examine this important  
18  
19 438 question. There were also an indication of lower acceptability/ratings for information sharing in the urban hiking  
20  
21 439 vs. the nature hiking groups. While we aimed to share information about the urban area, we did not provide an  
22  
23 440 exact route, which may have made it more difficult for participants to research urban vs. nature hikes, where we  
24  
25 listed a trail. Providing a map of the route might help participants feel prepared. Regarding differences in  
26 441  
27  
28 442 attendance by gender, a history of military sexual trauma, which is common among women Veterans (83), may  
29  
30 443 have impacted some women participants' comfort and perception of safety of hiking in nature with a majority  
31  
32 444 male group. Ensuring a greater proportion of women in each group or organizing women-only groups (as was  
33  
34 suggested by some participants) could address this concern. These changes, would, however, result in additional  
35 445  
36  
37 446 costs and tradeoffs that would need to be carefully considered.  
38  
39 447  
40

#### 41 448 *Conclusions*

42  
43 449 This pilot study provided useful information related to feasibility and acceptability, including common factors  
44  
45 that resulted in exclusion; resources and procedures needed for recruitment; factors to consider for selection of  
46 450  
47  
48 451 nature and urban hikes; and barriers and facilitators to achieving high completion in follow-up assessments and  
49  
50 452 the hikes. These insights can be harnessed to increase participation and rigor in future, scaled-up iterations of  
51  
52 453 the study, and ensure that environments are safe (i.e., non-triggering). Future studies with larger sample sizes  
53  
54  
55  
56  
57  
58  
59  
60

1  
2  
3 454 are needed to isolate the ways nature contact, PA, and social support conferred by the group impact outcomes  
4  
5  
6 455 to develop and provide well-tailored interventions.  
7  
8 456  
9  
10 457

11  
12  
13  
14  
15  
16  
17  
18  
19  
20  
21  
22  
23  
24  
25  
26  
27  
28  
29  
30  
31  
32  
33  
34  
35  
36  
37  
38  
39  
40  
41  
42  
43  
44  
45  
46  
47  
48  
49  
50  
51  
52  
53  
54  
55  
56  
57  
58  
59  
60

For peer review only

1  
2  
3 458 **List of abbreviations**

4  
5 459 ART Attention Restoration Theory  
6  
7  
8 460 HIPAA Health Insurance Portability and Accountability Act  
9  
10 461 IRB Institutional Review Board  
11  
12 462 PA Physical activity  
13  
14 463 PCL-5 PTSD Checklist for Diagnostic and Statistical Manual 5  
15  
16  
17 464 PTSD Posttraumatic stress disorder  
18  
19 465 SRT Stress Recovery Theory  
20  
21 466 VA Department of Veterans Affairs  
22

23 467  
24  
25 468 **Acknowledgements**

26  
27  
28 469 We thank the Veterans who participated in this study for allowing us to learn from them, including the Veterans  
29  
30 470 who participated in a prior unpublished feasibility study. We also thank Morgan Meadows and Gabrielle Fong  
31  
32 471 for their help with recruitment. This material is the result of work supported by VA Puget Sound Health Care  
33  
34 472 System, Seattle, WA. The views expressed in this article are those of the authors and do not necessarily reflect  
35  
36  
37 473 the position or policy of the Department of Veterans Affairs, the United States Government, Recreational  
38  
39 474 Equipment, Inc. (REI), or Outdoor Research.  
40

41  
42 475  
43  
44  
45 476 **Contributors:** AJL, GNB, CCE, JCF, KL, JB, and HF conceptualized the study and contributed to the intervention  
46  
47 477 development and design. AJL and GNB oversaw the conduct of the trial all the authors contributed to the  
48  
49 478 ongoing management of the trial. AJL, GNB, MM, AP, and CK oversaw data collection and data analysis. The  
50  
51 479 manuscript was drafted by AJL. All the authors contributed to the interpretation of the findings and revised and  
52  
53  
54 480 reviewed the paper.  
55

56 481

57

58

59

60

## References

1. Gates MA, Holowka DW, Vasterling JJ, et al. Posttraumatic stress disorder in veterans and military personnel: Epidemiology, screening, and case recognition. *Psychol. Serv.* 2012;9(4):361–382.
2. Fulton JJ, Calhoun PS, Wagner HR, et al. The prevalence of posttraumatic stress disorder in Operation Enduring Freedom/Operation Iraqi Freedom (OEF/OIF) Veterans: A meta-analysis. *J. Anxiety Disord.* 2015;31:98–107.
3. Schlenger WE, Kulka RA, Fairbank JA, et al. The prevalence of post-traumatic stress disorder in the Vietnam generation: A multimethod, multisource assessment of psychiatric disorder. *J. Trauma. Stress* [electronic article]. 1992;5(3):333–363. (<http://doi.wiley.com/10.1002/jts.2490050303>). (Accessed January 13, 2020)
4. Hall KS, Hoerster KD, Yancy WS. Post-traumatic stress disorder, physical activity, and eating behaviors. *Epidemiol. Rev.* 2015;37(1):103–115.
5. Warburton DER, Bredin SSD. Health benefits of physical activity: A systematic review of current systematic reviews. *Curr. Opin. Cardiol.* 2017;32(5):541–556.
6. Veterans Health Administration. Analysis of VA Health Care Utilization among Operation Enduring Freedom (OEF), Operation Iraqi Freedom (OIF), and Operation New Dawn (OND) Veterans. 2013 1–13 p.(<http://www.publichealth.va.gov/epidemiology/reports/oefoifond/health-care-utilization/index.asp>)
7. Kang HK, Li B, Mahan CM, et al. Health of US veterans of 1991 Gulf War: A follow-up survey in 10 years. *J. Occup. Environ. Med.* [electronic article]. 2009;51(4):401–410. (<https://insights.ovid.com/crossref?an=00043764-200904000-00003>). (Accessed January 13, 2020)
8. Magruder KM, McLaughlin KA, Elmore Borbon DL. Trauma is a public health issue. *Eur. J. Psychotraumatol.* 2017;8(1):1375338.
9. Gupta MA. Review of somatic symptoms in post-traumatic stress disorder. *Int. Rev. Psychiatry.* 2013;25(1):86–99.



- 1  
2  
3 506 10. Ginzburg K, Ein-Dor T, Solomon Z. Comorbidity of posttraumatic stress disorder, anxiety and depression:  
4  
5 507 A 20-year longitudinal study of war veterans. *J. Affect. Disord.* 2010;123(1–3):249–257.  
6  
7  
8 508 11. Frayne SM, Seaver MR, Loveland S, et al. Burden of medical illness in women with depression and  
9  
10 509 posttraumatic stress disorder. *Arch. Intern. Med.* 2004;  
11  
12 510 12. Dedert EA, Calhoun PS, Watkins LL, et al. Posttraumatic stress disorder, cardiovascular, and metabolic  
13  
14 511 disease: A review of the evidence. *Ann. Behav. Med.* 2010;39(1):61–78.  
15  
16  
17 512 13. The Management of Posttraumatic Stress Disorder Work Group. VA/DoD Clinical Practice Guidelines for  
18  
19 513 the Management of Posttraumatic Stress Disorder and Acute Stress Disorder. 2017 1–200 p.  
20  
21 514 14. Hoge CW, Castro CA, Messer SC, et al. Combat duty in Iraq and Afghanistan, mental health problems, and  
22  
23 515 barriers to care. *N. Engl. J. Med.* 2004;351(1):13–22.  
24  
25  
26 516 15. Sharp ML, Fear NT, Rona RJ, et al. Stigma as a barrier to seeking health care among military personnel  
27  
28 517 with mental health problems. *Epidemiol. Rev.* 2015;37(1):144–162.  
29  
30 518 16. Wang PS, Berglund P, Olfson M, et al. Failure and delay in initial treatment contact after first onset of  
31  
32 519 mental disorders in the National Comorbidity Survey Replication. *Arch. Gen. Psychiatry.* 2005;62(6):603–  
33  
34 520 613.  
35  
36  
37 521 17. Stecker T, Shiner B, Watts B V., et al. Treatment-seeking barriers for veterans of the Iraq and Afghanistan  
38  
39 522 conflicts who screen positive for PTSD. *Psychiatr. Serv.* 2013;64(3):280–283.  
40  
41 523 18. Hoge CW, Grossman SH, Auchterlonie JL, et al. PTSD treatment for soldiers after combat deployment:  
42  
43 524 Low utilization of mental health care and reasons for dropout. *Psychiatr. Serv.* 2014;65(8):997–1004.  
44  
45  
46 525 19. Hundt NE, Helm A, Smith TL, et al. Failure to engage: A qualitative study of veterans who decline  
47  
48 526 evidence-based psychotherapies for PTSD. *Psychol. Serv.* 2018;15(4):536–542.  
49  
50 527 20. Goetter EM, Bui E, Ojserkis RA, et al. A Systematic Review of Dropout From Psychotherapy for  
51  
52 528 Posttraumatic Stress Disorder Among Iraq and Afghanistan Combat Veterans. *J. Trauma. Stress.*  
53  
54 529 2015;28(5):401–409.  
55  
56  
57  
58  
59  
60

1  
2  
3  
4  
5  
6  
7  
8  
9  
10  
11  
12  
13  
14  
15  
16  
17  
18  
19  
20  
21  
22  
23  
24  
25  
26  
27  
28  
29  
30  
31  
32  
33  
34  
35  
36  
37  
38  
39  
40  
41  
42  
43  
44  
45  
46  
47  
48  
49  
50  
51  
52  
53  
54  
55  
56  
57  
58  
59  
60

- 530 21. Foa EB, McLean CP, Zang Y, et al. Effect of Prolonged Exposure Therapy Delivered Over 2 Weeks vs 8  
531 Weeks vs Present-Centered Therapy on PTSD Symptom Severity in Military Personnel A Randomized  
532 Clinical Trial. *JAMA - J. Am. Med. Assoc.* 2018;319(4):354–364.
- 533 22. Rauch SAM, Kim HM, Powell C, et al. Efficacy of Prolonged Exposure Therapy, Sertraline Hydrochloride,  
534 and Their Combination among Combat Veterans with Posttraumatic Stress Disorder: A Randomized  
535 Clinical Trial. *JAMA Psychiatry.* 2019;76(2):117–126.
- 536 23. Kehle-Forbes SM, Meis LA, Spont MR, et al. Treatment Initiation and Dropout from Prolonged Exposure  
537 and Cognitive Processing Therapy in a VA Outpatient Clinic. *Psychol. Trauma Theory, Res. Pract. Policy.*  
538 2016;8(1):107–114.
- 539 24. Keefe JR, Wiltsey Stirman S, Cohen ZD, et al. In rape trauma PTSD, patient characteristics indicate which  
540 trauma-focused treatment they are most likely to complete. *Depress. Anxiety.* 2018;35(4):330–338.
- 541 25. Frumkin H, Bratman GN, Breslow SJ, et al. Nature contact and human health: A research agenda. *Environ.*  
542 *Health Perspect.* 2017;125(7).
- 543 26. Bratman GN, Olvera-Alvarez HA, Gross JJ. The affective benefits of nature exposure. *Soc. Personal.*  
544 *Psychol. Compass* [electronic article].  
545 2021;(https://onlinelibrary.wiley.com/doi/abs/10.1111/spc3.12630). (Accessed July 13, 2021)
- 546 27. Kaplan S. The restorative benefits of nature: Toward an integrative framework. *J. Environ. Psychol.*  
547 1995;15(3):169–182.
- 548 28. Ulrich RS, Simons RF, Losito BD, et al. Stress recovery during exposure to natural and urban  
549 environments. *J. Environ. Psychol.* 1991;11(3):201–230.
- 550 29. van den Berg MMHE, Maas J, Muller R, et al. Autonomic nervous system responses to viewing green and  
551 built settings: Differentiating between sympathetic and parasympathetic activity. *Int. J. Environ. Res.*  
552 *Public Health.* 2015;12(12):15860–15874.
- 553 30. Kobayashi H, Song C, Ikei H, et al. Analysis of Individual Variations in Autonomic Responses to Urban and

- 1  
2  
3 554 Forest Environments. *Evidence-based Complement. Altern. Med.* 2015;2015.  
4  
5 555 31. Whitworth JW, Ciccolo JT. Exercise and Post-Traumatic Stress Disorder in Military Veterans: A Systematic  
6  
7 Review. *Mil. Med.* 2016;181(9):953–960.  
8 556  
9  
10 557 32. Kim SH, Schneider SM, Bevans M, et al. PTSD symptom reduction with mindfulness-based stretching and  
11  
12 558 deep breathing exercise: Randomized controlled clinical trial of efficacy. *J. Clin. Endocrinol. Metab.*  
13  
14 559 2013;98(7):2984–2992.  
15  
16  
17 560 33. Mitchell KS, Dick AM, Dimartino DM, et al. A Pilot Study of a Randomized Controlled Trial of Yoga as an  
18  
19 561 Intervention for PTSD Symptoms in Women. *J. Trauma. Stress.* 2014;27(2):121–128.  
20  
21 562 34. Van Der Kolk BA, Stone L, West J, et al. Yoga as an adjunctive treatment for posttraumatic stress disorder:  
22  
23 563 A randomized controlled trial. *J. Clin. Psychiatry.* 2014;75(6).  
24  
25  
26 564 35. Powers MB, Medina JL, Burns S, et al. Exercise Augmentation of Exposure Therapy for PTSD: Rationale  
27  
28 565 and Pilot Efficacy Data. *Cogn. Behav. Ther.* 2015;44(4):314–327.  
29  
30 566 36. Rosenbaum S, Sherrington C, Tiedemann A. Exercise augmentation compared with usual care for post-  
31  
32 567 traumatic stress disorder: A randomized controlled trial. *Acta Psychiatr. Scand.* 2015;131(5):350–359.  
33  
34  
35 568 37. Goldstein LA, Mehling WE, Metzler TJ, et al. Veterans Group Exercise: A randomized pilot trial of an  
36  
37 569 Integrative Exercise program for veterans with posttraumatic stress. *J. Affect. Disord.* 2018;227:345–352.  
38  
39 570 38. Whitworth JW, Nosrat S, SantaBarbara NJ, et al. Feasibility of Resistance Exercise for Posttraumatic Stress  
40  
41 571 and Anxiety Symptoms: A Randomized Controlled Pilot Study. *J. Trauma. Stress* [electronic article].  
42  
43 572 2019;32(6):977–984. (<http://www.ncbi.nlm.nih.gov/pubmed/31743507>). (Accessed April 18, 2020)  
44  
45  
46 573 39. Hall KS, Morey MC, Beckham JC, et al. Warrior Wellness: A Randomized Controlled Pilot Trial of the  
47  
48 574 Effects of Exercise on Physical Function and Clinical Health Risk Factors in Older Military Veterans With  
49  
50 575 PTSD. *J. Gerontol. A. Biol. Sci. Med. Sci.* 2020;75(11):2130–2138.  
51  
52 576 40. Lehavot K, Katon JG, Chen JA, et al. Post-traumatic Stress Disorder by Gender and Veteran Status. *Am. J.*  
53  
54  
55 577 *Prev. Med.* 2018;54(1):e1–e9.  
56  
57  
58  
59  
60

- 1  
2  
3 578 41. Hundt NE, Robinson A, Arney J, et al. Veterans' perspectives on benefits and drawbacks of peer support  
4  
5 579 for posttraumatic stress disorder. *Mil. Med.* [electronic article]. 2015;180(8):851–856.  
6  
7  
8 580 (<https://academic.oup.com/milmed/article/180/8/851/4160556>). (Accessed July 13, 2021)  
9  
10 581 42. Pretty J, Peacock J, Sellens M, et al. The mental and physical health outcomes of green exercise. *Int. J.*  
11  
12 582 *Environ. Health Res.* [electronic article]. 2005;15(5):319–337. ([https://www-tandfonline-](https://www-tandfonline-com.offcampus.lib.washington.edu/doi/abs/10.1080/09603120500155963)  
13  
14 583 [com.offcampus.lib.washington.edu/doi/abs/10.1080/09603120500155963](https://www-tandfonline-com.offcampus.lib.washington.edu/doi/abs/10.1080/09603120500155963)). (Accessed June 24, 2021)  
15  
16  
17 584 43. Thompson Coon J, Boddy K, Stein K, et al. Does participating in physical activity in outdoor natural  
18  
19 585 environments have a greater effect on physical and mental wellbeing than physical activity indoors? A  
20  
21 586 systematic review. *Environ. Sci. Technol.* [electronic article]. 2011;45(5):1761–1772.  
22  
23 587 ([https://pubs.acs.org/doi/abs/10.1021/es102947t?casa\\_token=D\\_eiqOzCftwAAAAA:72zfajf8uJe89tgt1oO](https://pubs.acs.org/doi/abs/10.1021/es102947t?casa_token=D_eiqOzCftwAAAAA:72zfajf8uJe89tgt1oO)  
24  
25 588 [dpMNZeUoYTKGjFUEpNLopojrQ2bPRK9VHjcOiJ0y1IRMvFmtjgAa2x2cS56I](https://pubs.acs.org/doi/abs/10.1021/es102947t?casa_token=D_eiqOzCftwAAAAA:72zfajf8uJe89tgt1oO)). (Accessed July 13, 2021)  
26  
27  
28 589 44. Lahart I, Darcy P, Gidlow C, et al. The effects of green exercise on physical and mental wellbeing: A  
29  
30 590 systematic review. *Int. J. Environ. Res. Public Health* [electronic article]. 2019;16(8):1352.  
31  
32 591 (<https://www.mdpi.com/1660-4601/16/8/1352/htm>). (Accessed July 13, 2021)  
33  
34  
35 592 45. Annerstedt M, Währborg P. Nature-assisted therapy: Systematic review of controlled and observational  
36  
37 593 studies. *Scand. J. Public Health.* 2011;39(4):371–388.  
38  
39 594 46. Barton J, Pretty J. What is the best dose of nature and green exercise for improving mental health- A  
40  
41 595 multi-study analysis. *Environ. Sci. Technol.* 2010;44(10):3947–3955.  
42  
43  
44 596 47. Wolsko C, Lindberg K, Reese R. Nature-Based Physical Recreation Leads to Psychological Well-Being:  
45  
46 597 Evidence from Five Studies. *Ecopsychology.* 2019;11(4):222–235.  
47  
48 598 48. Marselle MR, Irvine KN, Warber SL. Walking for well-being: Are group walks in certain types of natural  
49  
50 599 environments better for well-being than group walks in urban environments? *Int. J. Environ. Res. Public*  
51  
52 600 *Health.* 2013;10(11):5603–5628.  
53  
54  
55 601 49. Kyriakopoulos A. How individuals with self-reported anxiety and depression experienced a combination  
56  
57  
58  
59  
60

- 1  
2  
3 602 of individual counselling with an adventurous outdoor experience: A qualitative evaluation. *Couns.*  
4  
5 603 *Psychother. Res.* 2011;11(2):120–128.  
6  
7  
8 604 50. Bennett JL, Lundberg NR, Zabriskie R, et al. Addressing posttraumatic stress among Iraq and Afghanistan  
9  
10 605 veterans and significant others: An intervention utilizing sport and recreation. *Ther. Recreation J.*  
11  
12 606 [electronic article]. 2014;48(1):74–93.  
13  
14 607 ([http://connection.ebscohost.com/c/articles/94357429/addressing-posttraumatic-stress-among-iraq-](http://connection.ebscohost.com/c/articles/94357429/addressing-posttraumatic-stress-among-iraq-afghanistan-veterans-significant-others-intervention-utilizing-sport-recreation)  
15  
16  
17 608 [afghanistan-veterans-significant-others-intervention-utilizing-sport-recreation](http://connection.ebscohost.com/c/articles/94357429/addressing-posttraumatic-stress-among-iraq-afghanistan-veterans-significant-others-intervention-utilizing-sport-recreation))  
18  
19 609 51. Bennett JL, Piatt JA, Van Puymbroeck M. Outcomes of a Therapeutic Fly-Fishing Program for Veterans  
20  
21 610 with Combat-Related Disabilities: A Community-Based Rehabilitation Initiative. *Community Ment. Health*  
22  
23 611 *J.* [electronic article]. 2017;53(7):756–765. (<http://www.ncbi.nlm.nih.gov/pubmed/28303444>). (Accessed  
24  
25  
26 612 January 25, 2020)  
27  
28 613 52. Dustin DL, Dustin D, Bricker N, et al. The Promise of River Running as a Therapeutic Medium for Veterans  
29  
30 614 Coping with Post-Traumatic Stress Disorder. *Ther. Recreation J.* 2011;XIV(4):326–340.  
31  
32 615 53. Duvall J, Kaplan R. Enhancing the well-being of veterans using extended group-based nature recreation  
33  
34  
35 616 experiences. *J. Rehabil. Res. Dev.* 2014;51(5):685–696.  
36  
37 617 54. Gelkopf M, Hasson-Ohayon I, Bikman M, et al. Nature adventure rehabilitation for combat-related  
38  
39 618 posttraumatic chronic stress disorder: A randomized control trial. *Psychiatry Res.* 2013;209(3):485–493.  
40  
41 619 55. Hyer L, Boyd S, Scurfield R, et al. Effects of outward bound experience as an adjunct to inpatient PTSD  
42  
43  
44 620 treatment of war veterans. *J. Clin. Psychol.* 1996;52(3):263–278.  
45  
46 621 56. Greenleaf AT, Roessger KM. Effectiveness of care farming on veterans' life satisfaction, optimism, and  
47  
48 622 perceived loneliness. *J. Humanist. Couns.* [electronic article]. 2017;56(2):86–110.  
49  
50 623 (<https://www.researchgate.net/publication/310952083>). (Accessed June 23, 2021)  
51  
52 624 57. Poulsen DV, Stigsdotter UK, Refshage AD. Whatever happened to the soldiers? Nature-assisted therapies  
53  
54  
55 625 for veterans diagnosed with post-traumatic stress disorder: A literature review. *Urban For. Urban Green.*  
56  
57  
58  
59  
60

1  
2  
3  
4  
5  
6  
7  
8  
9  
10  
11  
12  
13  
14  
15  
16  
17  
18  
19  
20  
21  
22  
23  
24  
25  
26  
27  
28  
29  
30  
31  
32  
33  
34  
35  
36  
37  
38  
39  
40  
41  
42  
43  
44  
45  
46  
47  
48  
49  
50  
51  
52  
53  
54  
55  
56  
57  
58  
59  
60

- 2015;14(2):438–445.
- 626
- 627 58. Anderson CL, Monroy M, Keltner D. Awe in nature heals: Evidence from military veterans, at-risk youth,  
628 and college students. *Emotion* [electronic article]. 2018;18(8):1195–1202. (/record/2018-27538-001).  
629 (Accessed July 13, 2021)
- 630 59. Jennings V, Bamkole O. The relationship between social cohesion and urban green space: An avenue for  
631 health promotion. *Int. J. Environ. Res. Public Health* [electronic article]. 2019;16(3). (<https://pubmed-ncbi-nlm-nih-gov.offcampus.lib.washington.edu/30720732/>). (Accessed March 26, 2021)
- 632
- 633 60. Johansson M, Hartig T, Staats H. Psychological benefits of walking: Moderation by company and outdoor  
634 environment. *Appl. Psychol. Heal. Well-Being* [electronic article]. 2011;3(3):261–280. ([https://iaap-journals.onlinelibrary.wiley.com/doi/abs/10.1111/j.1758-0854.2011.01051.x?casa\\_token=cK-FtOYj7esAAAAA:gZLWakx7HxBuIORgOibMRxWA-nJ2tXPYmo89Mdbq13wOUyAFc28dj0Lhvowu-ePO4ic5agHycVmx-6g](https://iaap-journals.onlinelibrary.wiley.com/doi/abs/10.1111/j.1758-0854.2011.01051.x?casa_token=cK-FtOYj7esAAAAA:gZLWakx7HxBuIORgOibMRxWA-nJ2tXPYmo89Mdbq13wOUyAFc28dj0Lhvowu-ePO4ic5agHycVmx-6g)). (Accessed July 1, 2021)
- 635
- 636
- 637
- 638
- 639 61. Junger S. *Tribe: on homecoming and belonging*. New York, NY: Hatchette; 2016.
- 640
- 641 62. Price M, Lancaster CL, Gros DF, et al. An Examination of Social Support and PTSD Treatment Response  
642 During Prolonged Exposure. *Psychiatry (New York)*. 2018;81(3):258–270.
- 643
- 644 63. Zang Y, Gallagher T, McLean CP, et al. The impact of social support, unit cohesion, and trait resilience on  
645 PTSD in treatment-seeking military personnel with PTSD: The role of posttraumatic cognitions. *J. Psychiatr. Res.* 2017;86:18–25.
- 646
- 647 64. Cohen S, Wills TA. Stress, Social Support, and the Buffering Hypothesis. *Psychol. Bull.* 1985;98(2):310–  
648 357.
- 649
- 650 65. Thomas S, Reading J, Shephard RJ. Revision of the Physical Activity Readiness Questionnaire (PAR-Q).  
651 *Can. J. Sport Sci.* 1992;17(4):338–345.
- 652
- 653 66. Weathers FW, Litz BT, Keane TM, et al. The PTSD Checklist for DSM-5 (PCL-5). *Natl. Cent. PTSD.*  
654 2013;5(August):2002.

- 1  
2  
3 650 67. Yudko E, Lozhkina O, Fouts A. A comprehensive review of the psychometric properties of the Drug Abuse  
4  
5 651 Screening Test. *J. Subst. Abuse Treat.* 2007;32(2):189–198.  
6  
7  
8 652 68. Saunders JB, Aasland OG, Babor TF, et al. Development of the Alcohol Use Disorders Identification Test  
9  
10 653 (AUDIT): WHO Collaborative Project on Early Detection of Persons with Harmful Alcohol Consumption-II.  
11  
12 654 *Addiction.* 1993;88(6):791–804.  
13  
14 655 69. Sheehan D V., Lecrubier Y, Sheehan KH, et al. The Mini-International Neuropsychiatric Interview  
15  
16 656 (M.I.N.I.): The development and validation of a structured diagnostic psychiatric interview for DSM-IV  
17  
18 and ICD-10. In: *Journal of Clinical Psychiatry.* 1998:22–33.  
19 657  
20  
21 658 70. US Department of Veterans Affairs. Veterans Health Administration VA Adaptive Sports & Therapeutic  
22  
23 659 Arts: Grant Program. (<https://www.blogs.va.gov/nvspse/>). (Accessed June 28, 2021)  
24  
25  
26 660 71. Diener E, Emmons RA, Larsen RJ, et al. The Satisfaction With Life Scale. *J. Pers. Assess.* 1985;49(1):71–75.  
27  
28 661 72. Crawford JR, Henry JD. The Positive and Negative Affect Schedule (PANAS): Construct validity,  
29  
30 662 measurement properties and normative data in a large non-clinical sample. *Br. J. Clin. Psychol.*  
31  
32 663 2004;43(3):245–265.  
33  
34  
35 664 73. Thompson ER. Development and validation of an internationally reliable short-form of the Positive and  
36  
37 665 Negative Affect Schedule (PANAS). *J. Cross. Cult. Psychol.* 2007;38(2):227–242.  
38  
39 666 74. Buysse DJ, Reynolds CF, Monk TH, et al. The Pittsburgh sleep quality index: A new instrument for  
40  
41 667 psychiatric practice and research. *Psychiatry Res.* 1989;28(2):193–213.  
42  
43  
44 668 75. Trapnell PD, Campbell JD. Private self-consciousness and the five-factor model of personality:  
45  
46 669 Distinguishing rumination from reflection. *J. Pers. Soc. Psychol.* [electronic article]. 1999;76(2):284–304.  
47  
48 670 (<http://doi.apa.org/getdoi.cfm?doi=10.1037/0022-3514.76.2.284>). (Accessed January 14, 2020)  
49  
50 671 76. Preece DA, Becerra R, Robinson K, et al. The Emotion Regulation Questionnaire: Psychometric Properties  
51  
52 672 in General Community Samples. *J. Pers. Assess.* [electronic article]. 2020;102(3):348–356.  
53  
54  
55 673 (<https://www.tandfonline.com/doi/full/10.1080/00223891.2018.1564319>). (Accessed May 25, 2020)  
56  
57  
58  
59  
60

1  
2  
3  
4  
5  
6  
7  
8  
9  
10  
11  
12  
13  
14  
15  
16  
17  
18  
19  
20  
21  
22  
23  
24  
25  
26  
27  
28  
29  
30  
31  
32  
33  
34  
35  
36  
37  
38  
39  
40  
41  
42  
43  
44  
45  
46  
47  
48  
49  
50  
51  
52  
53  
54  
55  
56  
57  
58  
59  
60

- 674 77. Leon AC, Davis LL, Kraemer HC. The role and interpretation of pilot studies in clinical research. *J. Psychiatr. Res.* 2011;45(5):626–629.
- 675
- 676 78. Elo S, Kyngäs H. The qualitative content analysis process. *J. Adv. Nurs.* 2008;62(1):107–115.
- 677 79. Kraemer HC, Mintz J, Noda A, et al. Caution regarding the use of pilot studies to guide power calculations  
678 for study proposals. *Arch. Gen. Psychiatry* [electronic article]. 2006;63(5):484–489.  
679 (<http://archpsyc.jamanetwork.com/article.aspx?doi=10.1001/archpsyc.63.5.484>). (Accessed April 20,  
680 2019)
- 681 80. Walters SJ, Dos Anjos Henriques-Cadby IB, Bortolami O, et al. Recruitment and retention of participants  
682 in randomised controlled trials: A review of trials funded and published by the United Kingdom Health  
683 Technology Assessment Programme. *BMJ Open* [electronic article]. 2017;7(3):15276.  
684 (<http://www.isrctn.com/>). (Accessed December 31, 2020)
- 685 81. Steenkamp MMMM, Marmar CCR, Litz BT, et al. First-line Psychotherapies for Military-Related PTSD.  
686 *JAMA.* 2020;323(7):656.
- 687 82. Troiano RP, Berrigan D, Dodd KW, et al. Physical activity in the United States measured by accelerometer.  
688 *Med. Sci. Sports Exerc.* 2008;40(1):181–188.
- 689 83. Wilson LC. The Prevalence of Military Sexual Trauma: A Meta-Analysis. *Trauma, Violence, Abus.*  
690 2018;19(5):584–597.



1  
2  
3  
4  
5  
6  
7  
8  
9  
10  
11  
12  
13  
14  
15  
16  
17  
18  
19  
20  
21  
22  
23  
24  
25  
26  
27  
28  
29  
30  
31  
32  
33  
34  
35  
36  
37  
38  
39  
40  
41  
42  
43  
44  
45  
46  
47  
48  
49  
50  
51  
52  
53  
54  
55  
56  
57  
58  
59  
60

Figure 1. Conceptual model

Figure 2. Depiction of study design and assessments

Figure 3. CONSORT diagram

For peer review only

**Table 1. Baseline characteristics of Veterans in the urban and nature hiking groups**

| Characteristic             | Total (n=26) |            | Nature (n=13) |            | Urban (n=13) |            |
|----------------------------|--------------|------------|---------------|------------|--------------|------------|
|                            | N or<br>mean | % or<br>SD | N or<br>Mean  | % or<br>SD | N or<br>Mean | % or<br>SD |
| <b>Age (years)</b>         |              |            |               |            |              |            |
| <30                        | 2            | 8          | 1             | 8          | 1            | 8          |
| 30-39                      | 5            | 19         | 2             | 15         | 3            | 23         |
| 40-49                      | 6            | 23         | 4             | 31         | 2            | 15         |
| 50-59                      | 11           | 42         | 6             | 46         | 5            | 38         |
| ≥60                        | 2            | 8          | 0             | 0          | 2            | 15         |
| <b>Gender</b>              |              |            |               |            |              |            |
| Male                       | 19           | 73         | 8             | 62         | 11           | 85         |
| Female                     | 7            | 27         | 5             | 38         | 2            | 15         |
| <b>Race/ethnicity</b>      |              |            |               |            |              |            |
| Asian/Pacific Islander, NH | 3            | 12         | 2             | 15         | 1            | 8          |
| Black, NH                  | 2            | 8          | 0             | 0          | 2            | 15         |
| Hispanic                   | 3            | 12         | 1             | 8          | 2            | 15         |
| Native American, NH        | 2            | 8          | 0             | 0          | 2            | 15         |
| Other                      | 1            | 4          | 0             | 0          | 1            | 7.7        |
| White, NH                  | 15           | 58         | 10            | 77         | 5            | 38         |
| <b>Marital status</b>      |              |            |               |            |              |            |
| Single, never married      | 4            | 15         | 3             | 23         | 1            | 8          |
| Married currently          | 14           | 54         | 7             | 54         | 7            | 54         |

| Characteristic                                                              | Total (n=26) |            | Nature (n=13) |            | Urban (n=13) |            |
|-----------------------------------------------------------------------------|--------------|------------|---------------|------------|--------------|------------|
|                                                                             | N or<br>mean | % or<br>SD | N or<br>Mean  | % or<br>SD | N or<br>Mean | % or<br>SD |
| Separated/divorced                                                          | 8            | 31         | 3             | 23         | 5            | 38         |
| <b>Education</b>                                                            |              |            |               |            |              |            |
| High school degree or equivalent                                            | 4            | 15         | 1             | 8          | 3            | 23         |
| Some college, no degree                                                     | 10           | 38         | 7             | 54         | 3            | 23         |
| Associate degree                                                            | 4            | 15         | 1             | 8          | 3            | 23         |
| Bachelor's degree                                                           | 4            | 15         | 2             | 15         | 2            | 15         |
| Masters, doctorate, or professional<br>degree                               | 4            | 15         | 2             | 15         | 2            | 15         |
| <b>Annual household income</b>                                              |              |            |               |            |              |            |
| \$25,000-\$49,999                                                           | 7            | 27         | 4             | 31         | 3            | 23         |
| \$50,000-\$74,999                                                           | 11           | 42         | 4             | 31         | 7            | 54         |
| \$75,000-\$99,999                                                           | 2            | 8          | 1             | 8          | 1            | 8          |
| \$100,000 or more                                                           | 4            | 15         | 3             | 23         | 1            | 8          |
| Prefer not to answer                                                        | 2            | 8          | 1             | 8          | 1            | 8          |
| <b>Employment status</b>                                                    |              |            |               |            |              |            |
| Full-time                                                                   | 12           | 46         | 6             | 46         | 6            | 46         |
| Part-time                                                                   | 1            | 4          | 1             | 8          | 0            | 0          |
| Not employed (disabled, retired, not<br>looking for work, homemaker, other) | 13           | 50         | 6             | 46         | 7            | 54         |
| <b>Highest military rank</b>                                                |              |            |               |            |              |            |

| Characteristic                               | Total (n=26) |            | Nature (n=13) |            | Urban (n=13) |            |
|----------------------------------------------|--------------|------------|---------------|------------|--------------|------------|
|                                              | N or<br>mean | % or<br>SD | N or<br>Mean  | % or<br>SD | N or<br>Mean | % or<br>SD |
| Enlisted (E1-E4)                             | 9            | 35         | 4             | 31         | 5            | 38         |
| Non-commissioned officer (E5-E9)             | 15           | 58         | 8             | 62         | 7            | 54         |
| Officer (O1-O4)                              | 2            | 8          | 1             | 8          | 1            | 8          |
| <b>VA disability rating*†</b>                |              |            |               |            |              |            |
| No rating                                    | 2            | 8          | 0             | 0          | 2            | 15         |
| 30-60%                                       | 2            | 8          | 2             | 15         | 0            | 0          |
| 70-90%                                       | 8            | 31         | 4             | 31         | 4            | 31         |
| 100%                                         | 12           | 46         | 6             | 46         | 6            | 46         |
| <b>Self-reported health</b>                  |              |            |               |            |              |            |
| Excellent/very good                          | 9            | 35         | 3             | 23         | 6            | 45         |
| Good                                         | 11           | 42         | 7             | 54         | 4            | 31         |
| Fair (no one reported poor)                  | 6            | 23         | 3             | 23         | 3            | 23         |
| <b>PCL-5 score‡</b>                          |              |            |               |            |              |            |
| Mean, SD                                     | 47.1         | 10.9       | 46.0          | 11.4       | 48.2         | 10.8       |
| <b>Served in combat [yes]</b>                | 17           | 65         | 8             | 62         | 9            | 69         |
| <b>Combat Exposure Score; mean (SD)* †</b>   | 16.6         | 7.9        | 15.6          | 8.2        | 17.7         | 7.9        |
| <b>Patient Health Questionnaire-8 score*</b> |              |            |               |            |              |            |
| <10 (no depression)                          | 8            | 32         | 4             | 33         | 4            | 31         |
| 10-19 (major depression)                     | 14           | 56         | 7             | 58         | 7            | 54         |
| ≥20 (severe major depression)                | 3            | 12         | 1             | 8          | 2            | 15         |

| Characteristic                                                        | Total (n=26) |            | Nature (n=13) |            | Urban (n=13) |            |
|-----------------------------------------------------------------------|--------------|------------|---------------|------------|--------------|------------|
|                                                                       | N or<br>mean | % or<br>SD | N or<br>Mean  | % or<br>SD | N or<br>Mean | % or<br>SD |
| <b>Physical activity level</b>                                        |              |            |               |            |              |            |
| Low                                                                   | 8            | 31         | 5             | 38         | 3            | 23         |
| Moderate                                                              | 3            | 12         | 1             | 8          | 2            | 15         |
| High                                                                  | 15           | 58         | 7             | 54         | 8            | 62         |
| <b>Times gone hiking for 1+ hrs in last year</b>                      |              |            |               |            |              |            |
| Never                                                                 | 5            | 19         | 3             | 23         | 2            | 15         |
| 1-3                                                                   | 9            | 35         | 4             | 31         | 5            | 38         |
| 4-6                                                                   | 5            | 19         | 2             | 15         | 3            | 23         |
| 7+                                                                    | 7            | 27         | 4             | 31         | 3            | 23         |
| <b>Outdoor / nature-based activity<br/>experience</b>                 |              |            |               |            |              |            |
| None (no experience in the outdoors)                                  | 0            | 0          | 0             | 0          | 0            | 0          |
| Casual (done some day hiking on<br>maintained trails and car camping) | 10           | 38         | 5             | 38         | 5            | 38         |
| Amateur (have experience with<br>backpacking)                         | 11           | 42         | 6             | 46         | 5            | 38         |
| Expert (substantial backcountry<br>experience)                        | 5            | 19         | 2             | 15         | 3            | 23         |

Abbreviations: NH, Non-Hispanic; PCL-5, Post-traumatic stress disorder checklist for Diagnostic and  
Statistical Manual 5; PTSD, post-traumatic stress disorder; SD, standard deviation

\* Missing response for 1 nature participant

1  
2  
3 † Missing response for 1 urban participant  
4  
5

6 ‡ One person in the nature hiking group had a PCL-5 of 32 (below the eligibility threshold of 33) due to  
7  
8 an undetected error in initial scoring.  
9  
10  
11  
12  
13  
14  
15  
16  
17  
18  
19  
20  
21  
22  
23  
24  
25  
26  
27  
28  
29  
30  
31  
32  
33  
34  
35  
36  
37  
38  
39  
40  
41  
42  
43  
44  
45  
46  
47  
48  
49  
50  
51  
52  
53  
54  
55  
56  
57  
58  
59  
60

For peer review only

**Table 2. Key themes and findings from qualitative data**

| Themes                | Findings                                                                                                                                                                                                                                                                                                                                                                                                                                                                                                                                                    |
|-----------------------|-------------------------------------------------------------------------------------------------------------------------------------------------------------------------------------------------------------------------------------------------------------------------------------------------------------------------------------------------------------------------------------------------------------------------------------------------------------------------------------------------------------------------------------------------------------|
| A positive experience | <ul style="list-style-type: none"> <li>Both nature (“All expectations were exceeded”) and urban study participants (“LOVE THE GROUP”) provided positive feedback.</li> </ul>                                                                                                                                                                                                                                                                                                                                                                                |
| Perceived benefits    | <ul style="list-style-type: none"> <li>Participants reported on how the hikes helped them to be more active, lose weight, reduce stress, and feel more connected to others.</li> </ul>                                                                                                                                                                                                                                                                                                                                                                      |
| Hike logistics        | <ul style="list-style-type: none"> <li>Participants suggested that prior to hikes, we ensure parking access, availability of toilets, and locate the hikes closer to participants’ homes.</li> <li>Others suggested that we consider organizing carpools and/or covering gas/mileage costs</li> </ul>                                                                                                                                                                                                                                                       |
| Difficulty of hikes   | <ul style="list-style-type: none"> <li>Most found the difficulty just right.</li> <li>Some felt that the hikes were too short/easy.</li> </ul>                                                                                                                                                                                                                                                                                                                                                                                                              |
| Location of hikes     | <ul style="list-style-type: none"> <li><u>Nature group</u>: One participant wished that there was more of a “reward” (“like a waterfall”, “when you have a view, it seems more profound”), because some were just “walks through the woods.”</li> <li><u>Urban group</u>: One person noted that some neighborhoods were “sketchy” and they were “constantly walking around garbage” for one hike. Others noted that they really enjoyed exploring different neighborhoods, areas around sports stadium, and learning about the history of areas.</li> </ul> |

|                                                                   |                                                                                                                                                                                                                                                                                                                                                                                                                                                                                                                                                                                                                                                                        |
|-------------------------------------------------------------------|------------------------------------------------------------------------------------------------------------------------------------------------------------------------------------------------------------------------------------------------------------------------------------------------------------------------------------------------------------------------------------------------------------------------------------------------------------------------------------------------------------------------------------------------------------------------------------------------------------------------------------------------------------------------|
| Group composition                                                 | <ul style="list-style-type: none"> <li>• A few participants suggested that we enroll more women or organize women-only groups and/or groups for survivors of sexual assault.</li> </ul>                                                                                                                                                                                                                                                                                                                                                                                                                                                                                |
| Incentives for completing questionnaires                          | <ul style="list-style-type: none"> <li>• Participants suggested that we offer the option to receive a single gift card that accumulated value instead of separate ones each time a questionnaire was completed.</li> </ul>                                                                                                                                                                                                                                                                                                                                                                                                                                             |
| Assessments                                                       | <ul style="list-style-type: none"> <li>• Several participants had trouble with the online software (e.g., getting “kicked out” of the survey mid-way through);</li> <li>• Some participants reported that they would have liked text prompts instead of email, since they did not regularly check their email.</li> <li>• Some participants found some questions to be difficult to answer (e.g., the Perceived Cohesion Scale) or they were confused by differences in the time frame for different instruments (e.g., on the weekly questionnaires, some questions asked participants how they felt “right now” while others asked about the prior week).</li> </ul> |
| Activity monitors                                                 | <ul style="list-style-type: none"> <li>• Several participants noted having problems programming and syncing the activity monitor.</li> </ul>                                                                                                                                                                                                                                                                                                                                                                                                                                                                                                                           |
| Fostering interaction/connections between participants in a group | <ul style="list-style-type: none"> <li>• Participants suggested facilitating more structured ways to get to know other members of the group, including a social gathering prior to the initial hike, re-introductions before each hike, gathering for lunch or other meal after hikes, and organizing a social media group.</li> </ul>                                                                                                                                                                                                                                                                                                                                 |



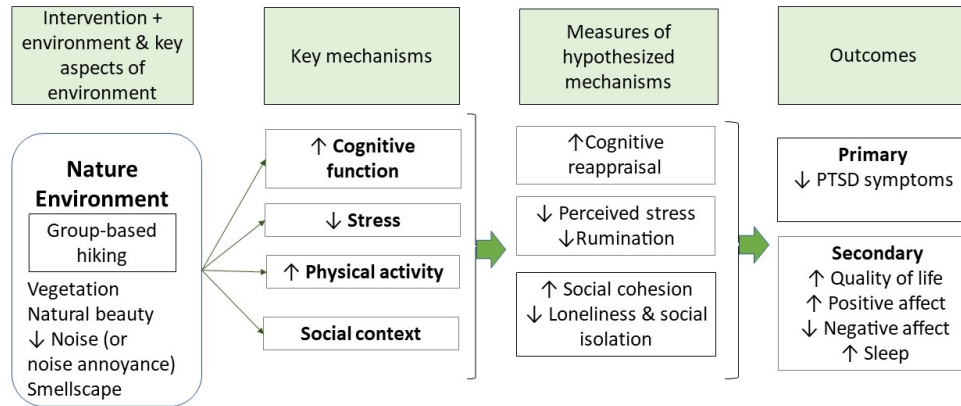

Figure 1. Conceptual model

338x190mm (96 x 96 DPI)



Figure 2. Depiction of study design and assessments

338x190mm (96 x 96 DPI)

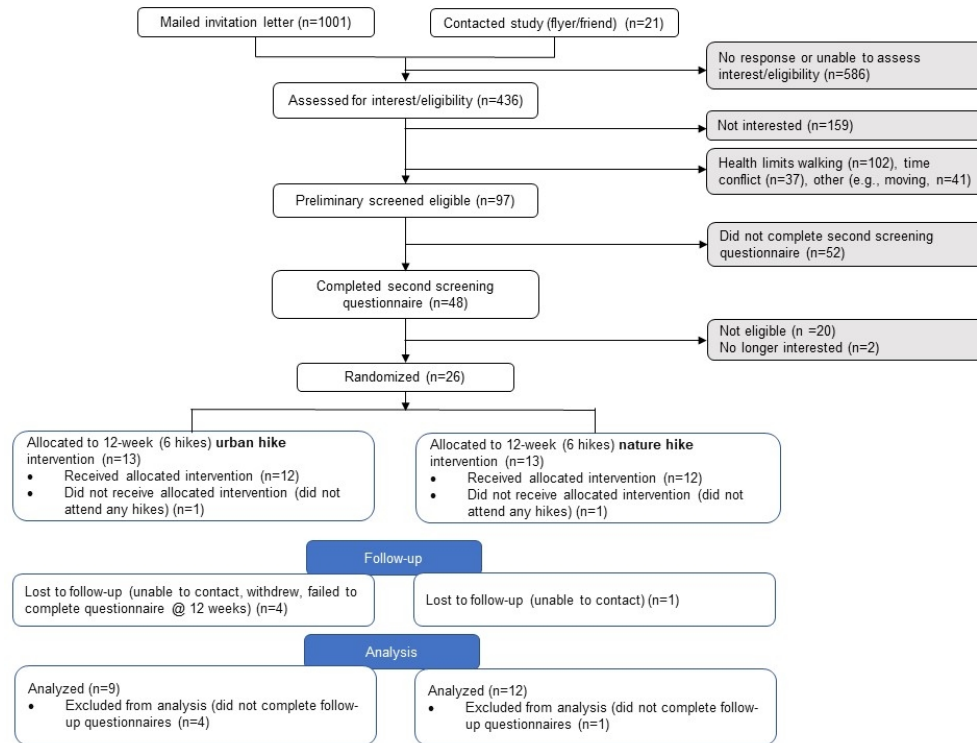

Figure 3. CONSORT diagram

254x190mm (96 x 96 DPI)

**Supplemental Table 1. Constructs, instruments, and timing of assessments**

| Constructs                                               | Instrument                                                                               |
|----------------------------------------------------------|------------------------------------------------------------------------------------------|
| Demographics                                             | n/a (Age, gender, race/ethnicity, education, service-connected disability, etc.)         |
| Combat exposure                                          | First two questions of the PTSD Diagnostic Scale-5 (73) and Combat Exposure Scale (74)   |
| Ability to safely perform unsupervised physical activity | Physical Activity Readiness Questionnaire (PAR-Q) (62)                                   |
| Suicidal ideation                                        | MINI Suicidality module (65)                                                             |
| QoL/well-being                                           | Satisfaction with Life Scale (75)                                                        |
| Physical health                                          | 14-item Physical Health Questionnaire (76)                                               |
| PTSD symptoms                                            | PTSD Checklist for DSM- 5 (61)                                                           |
| Depression                                               | Personal Health Questionnaire (PHQ)-8 (77)                                               |
| Perceived Stress                                         | 4-item Perceived Stress Scale (PSS) (78,79)                                              |
| Affect                                                   | 20-item Positive and Negative Affect Schedule (PANAS) (80,81)                            |
|                                                          | 10-item PANAS                                                                            |
| Loneliness                                               | 3-item UCLA loneliness scale (82)                                                        |
| Social connectedness                                     | First four items of the 6-item Perceived Cohesion Scale (83)                             |
| Anxiety                                                  | 20-item Stress and Anxiety Scale (STAI) – state level                                    |
|                                                          | 6-item STAI                                                                              |
| Sleep                                                    | Full (19-item) Pittsburgh Sleep Quality Index (PSQI) (84)                                |
|                                                          | Shortened (5-item) PSQI                                                                  |
| Nature connection                                        | Connectedness to Nature Scale (6-items) (85)                                             |
| Rumination                                               | Full (12-item) state rumination (brooding subscale of Rumination Reflection Scale [RRS]) |
|                                                          | Shortened (8-item) state rumination (brooding subscale of RRS) (86)                      |
| Cognitive reappraisal                                    | 4-item state emotion regulation questionnaire (ERQ) (87)                                 |
| Physical activity – self report                          | 9-item International Physical Activity Questionnaire (IPAQ) short form (68)              |

| Constructs                                 | Instrument                                                     |
|--------------------------------------------|----------------------------------------------------------------|
| Physical activity monitor                  | Wrist worn activity monitor (Garmin Vivosmart 4)               |
| Alcohol consumption                        | 10-item Alcohol Use Disorders Identification Test (AUDIT) (64) |
|                                            | 3-item (AUDIT-C) (88)                                          |
| Drug-related problems                      | Drug Abuse Screening Test-10 (63)                              |
| PTSD treatments                            | n/a                                                            |
| Preference for treatment, hiking frequency | n/a                                                            |
| and expectation about treatment            | n/a                                                            |
| Acceptability of hikes                     | n/a                                                            |

‡Timing of assessment: S/B: screening/baseline, WK: weekly – weeks 1-5 and 7-11, FU: 6-, 12-, and 24-week follow-ups

†A, acceptability; CO, covariate (including moderators); E, eligibility (to assess inclusion/exclusion criteria); M, mediator P, primary outcome; S, secondary outcome

**Figure 1. PTSD Checklist scores at baseline, 12- and to 24-weeks follow-up**



review only

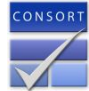

## CONSORT 2010 checklist of information to include when reporting a pilot or feasibility trial\*

| Section/Topic                    | Item No | Checklist item                                                                                                                                                                              | Reported on page No |
|----------------------------------|---------|---------------------------------------------------------------------------------------------------------------------------------------------------------------------------------------------|---------------------|
| <b>Title and abstract</b>        |         |                                                                                                                                                                                             |                     |
|                                  | 1a      | Identification as a pilot or feasibility randomised trial in the title                                                                                                                      | 1                   |
|                                  | 1b      | Structured summary of pilot trial design, methods, results, and conclusions (for specific guidance see CONSORT abstract extension for pilot trials)                                         | 2                   |
| <b>Introduction</b>              |         |                                                                                                                                                                                             |                     |
| Background and objectives        | 2a      | Scientific background and explanation of rationale for future definitive trial, and reasons for randomised pilot trial                                                                      | 5-7                 |
|                                  | 2b      | Specific objectives or research questions for pilot trial                                                                                                                                   | 7                   |
| <b>Methods</b>                   |         |                                                                                                                                                                                             |                     |
| Trial design                     | 3a      | Description of pilot trial design (such as parallel, factorial) including allocation ratio                                                                                                  | 9                   |
|                                  | 3b      | Important changes to methods after pilot trial commencement (such as eligibility criteria), with reasons                                                                                    | 11                  |
| Participants                     | 4a      | Eligibility criteria for participants                                                                                                                                                       | 8                   |
|                                  | 4b      | Settings and locations where the data were collected                                                                                                                                        | 8-10                |
|                                  | 4c      | How participants were identified and consented                                                                                                                                              | 8                   |
| Interventions                    | 5       | The interventions for each group with sufficient details to allow replication, including how and when they were actually administered                                                       | 9-11                |
| Outcomes                         | 6a      | Completely defined prespecified assessments or measurements to address each pilot trial objective specified in 2b, including how and when they were assessed                                | 8, 11-12            |
|                                  | 6b      | Any changes to pilot trial assessments or measurements after the pilot trial commenced, with reasons                                                                                        | n/a                 |
|                                  | 6c      | If applicable, prespecified criteria used to judge whether, or how, to proceed with future definitive trial                                                                                 | n/a                 |
| Sample size                      | 7a      | Rationale for numbers in the pilot trial                                                                                                                                                    | 11                  |
|                                  | 7b      | When applicable, explanation of any interim analyses and stopping guidelines                                                                                                                | n/a                 |
| Randomisation:                   |         |                                                                                                                                                                                             |                     |
| Sequence generation              | 8a      | Method used to generate the random allocation sequence                                                                                                                                      | 9                   |
|                                  | 8b      | Type of randomisation(s); details of any restriction (such as blocking and block size)                                                                                                      | 9                   |
| Allocation concealment mechanism | 9       | Mechanism used to implement the random allocation sequence (such as sequentially numbered containers), describing any steps taken to conceal the sequence until interventions were assigned | 9                   |

|                                                      |     |                                                                                                                                                                                       |                       |
|------------------------------------------------------|-----|---------------------------------------------------------------------------------------------------------------------------------------------------------------------------------------|-----------------------|
| Implementation                                       | 10  | Who generated the random allocation sequence, who enrolled participants, and who assigned participants to interventions                                                               | 8                     |
| Blinding                                             | 11a | If done, who was blinded after assignment to interventions (for example, participants, care providers, those assessing outcomes) and how                                              | 8                     |
|                                                      | 11b | If relevant, description of the similarity of interventions                                                                                                                           | 9-10                  |
| Statistical methods                                  | 12  | Methods used to address each pilot trial objective whether qualitative or quantitative                                                                                                | 9-11                  |
| <b>Results</b>                                       |     |                                                                                                                                                                                       |                       |
| Participant flow (a diagram is strongly recommended) | 13a | For each group, the numbers of participants who were approached and/or assessed for eligibility, randomly assigned, received intended treatment, and were assessed for each objective | Figure 3              |
|                                                      | 13b | For each group, losses and exclusions after randomisation, together with reasons                                                                                                      | Figure 3              |
| Recruitment                                          | 14a | Dates defining the periods of recruitment and follow-up                                                                                                                               | Figure 2, page 11-12  |
|                                                      | 14b | Why the pilot trial ended or was stopped                                                                                                                                              | 12                    |
| Baseline data                                        | 15  | A table showing baseline demographic and clinical characteristics for each group                                                                                                      | Table 1               |
| Numbers analysed                                     | 16  | For each objective, number of participants (denominator) included in each analysis. If relevant, these numbers should be by randomised group                                          | Figure 3              |
| Outcomes and estimation                              | 17  | For each objective, results including expressions of uncertainty (such as 95% confidence interval) for any estimates. If relevant, these results should be by randomised group        | Supplemental Figure 1 |
| Ancillary analyses                                   | 18  | Results of any other analyses performed that could be used to inform the future definitive trial                                                                                      | Table 2               |
| Harms                                                | 19  | All important harms or unintended effects in each group (for specific guidance see CONSORT for harms)                                                                                 | 15                    |
|                                                      | 19a | If relevant, other important unintended consequences                                                                                                                                  | n/a                   |
| <b>Discussion</b>                                    |     |                                                                                                                                                                                       |                       |
| Limitations                                          | 20  | Pilot trial limitations, addressing sources of potential bias and remaining uncertainty about feasibility                                                                             | 17-21                 |
| Generalisability                                     | 21  | Generalisability (applicability) of pilot trial methods and findings to future definitive trial and other studies                                                                     | 17-21                 |
| Interpretation                                       | 22  | Interpretation consistent with pilot trial objectives and findings, balancing potential benefits and harms, and considering other relevant evidence                                   | 17-21                 |
|                                                      | 22a | Implications for progression from pilot to future definitive trial, including any proposed amendments                                                                                 | 17-21                 |
| <b>Other information</b>                             |     |                                                                                                                                                                                       |                       |
| Registration                                         | 23  | Registration number for pilot trial and name of trial registry                                                                                                                        | 3                     |
| Protocol                                             | 24  | Where the pilot trial protocol can be accessed, if available                                                                                                                          | n/a                   |
| Funding                                              | 25  | Sources of funding and other support (such as supply of drugs), role of funders                                                                                                       | 2, 9                  |
|                                                      | 26  | Ethical approval or approval by research review committee, confirmed with reference number                                                                                            | 13                    |



1  
2  
3  
4  
5  
6  
7  
8  
9  
10  
11  
12  
13  
14  
15  
16  
17  
18  
19  
20  
21  
22  
23  
24  
25  
26  
27  
28  
29  
30  
31  
32  
33  
34  
35  
36  
37  
38  
39  
40  
41  
42  
43  
44  
45  
46

Citation: Eldridge SM, Chan CL, Campbell MJ, Bond CM, Hopewell S, Thabane L, et al. CONSORT 2010 statement: extension to randomised pilot and feasibility trials. *BMJ*. 2016;355.  
\*We strongly recommend reading this statement in conjunction with the CONSORT 2010, extension to randomised pilot and feasibility trials, Explanation and Elaboration for important clarifications on all the items. If relevant, we also recommend reading CONSORT extensions for cluster randomised trials, non-inferiority and equivalence trials, non-pharmacological treatments, herbal interventions, and pragmatic trials. Additional extensions are forthcoming: for those and for up to date references relevant to this checklist, see [www.consort-statement.org](http://www.consort-statement.org).

For peer review only

# BMJ Open

## Nature versus urban hiking for Veterans with posttraumatic stress disorder: a pilot randomized trial conducted in the Pacific Northwest United States

|                                 |                                                                                                                                                                                                                                                                                                                                                                                                                                                                                                                                                                                                                                                                                                                                                                                                                                                                             |
|---------------------------------|-----------------------------------------------------------------------------------------------------------------------------------------------------------------------------------------------------------------------------------------------------------------------------------------------------------------------------------------------------------------------------------------------------------------------------------------------------------------------------------------------------------------------------------------------------------------------------------------------------------------------------------------------------------------------------------------------------------------------------------------------------------------------------------------------------------------------------------------------------------------------------|
| Journal:                        | <i>BMJ Open</i>                                                                                                                                                                                                                                                                                                                                                                                                                                                                                                                                                                                                                                                                                                                                                                                                                                                             |
| Manuscript ID                   | bmjopen-2021-051885.R2                                                                                                                                                                                                                                                                                                                                                                                                                                                                                                                                                                                                                                                                                                                                                                                                                                                      |
| Article Type:                   | Original research                                                                                                                                                                                                                                                                                                                                                                                                                                                                                                                                                                                                                                                                                                                                                                                                                                                           |
| Date Submitted by the Author:   | 31-Aug-2021                                                                                                                                                                                                                                                                                                                                                                                                                                                                                                                                                                                                                                                                                                                                                                                                                                                                 |
| Complete List of Authors:       | Littman, Alyson; VA Puget Sound Health Care System, Seattle Epidemiologic Research and Information System and Seattle-Denver Center of Innovation; University of Washington, Epidemiology<br>Bratman, Gregory N; University of Washington<br>Lehavot, Keren; University of Washington School of Public Health, Department of Veterans Affairs Puget Sound Health Care System<br>Engel, Charles C; University of Washington School of Public Health, Department of Veterans Affairs Puget Sound Health Care System<br>Fortney, John ; University of Washington<br>Peterson, Alexander; VA Puget Sound Health Care System, Seattle Epidemiologic Research and Information Center<br>Jones, Alex; Outdoors for All<br>Klassen, Carolyn; Seattle Epidemiologic Research and Information Center<br>Brandon, Josh; Spirit of America<br>Frumkin, Howard; University of Washington |
| <b>Primary Subject Heading</b>: | Mental health                                                                                                                                                                                                                                                                                                                                                                                                                                                                                                                                                                                                                                                                                                                                                                                                                                                               |
| Secondary Subject Heading:      | Complementary medicine, Epidemiology, Public health, Qualitative research, Sports and exercise medicine                                                                                                                                                                                                                                                                                                                                                                                                                                                                                                                                                                                                                                                                                                                                                                     |
| Keywords:                       | Adult psychiatry < PSYCHIATRY, TRAUMA MANAGEMENT, COMPLEMENTARY MEDICINE, PUBLIC HEALTH                                                                                                                                                                                                                                                                                                                                                                                                                                                                                                                                                                                                                                                                                                                                                                                     |
|                                 |                                                                                                                                                                                                                                                                                                                                                                                                                                                                                                                                                                                                                                                                                                                                                                                                                                                                             |

SCHOLARONE™  
Manuscripts

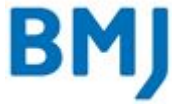

I, the Submitting Author has the right to grant and does grant on behalf of all authors of the Work (as defined in the below author licence), an exclusive licence and/or a non-exclusive licence for contributions from authors who are: i) UK Crown employees; ii) where BMJ has agreed a CC-BY licence shall apply, and/or iii) in accordance with the terms applicable for US Federal Government officers or employees acting as part of their official duties; on a worldwide, perpetual, irrevocable, royalty-free basis to BMJ Publishing Group Ltd ("BMJ") its licensees and where the relevant Journal is co-owned by BMJ to the co-owners of the Journal, to publish the Work in this journal and any other BMJ products and to exploit all rights, as set out in our [licence](#).

The Submitting Author accepts and understands that any supply made under these terms is made by BMJ to the Submitting Author unless you are acting as an employee on behalf of your employer or a postgraduate student of an affiliated institution which is paying any applicable article publishing charge ("APC") for Open Access articles. Where the Submitting Author wishes to make the Work available on an Open Access basis (and intends to pay the relevant APC), the terms of reuse of such Open Access shall be governed by a Creative Commons licence – details of these licences and which [Creative Commons](#) licence will apply to this Work are set out in our licence referred to above.

Other than as permitted in any relevant BMJ Author's Self Archiving Policies, I confirm this Work has not been accepted for publication elsewhere, is not being considered for publication elsewhere and does not duplicate material already published. I confirm all authors consent to publication of this Work and authorise the granting of this licence.

1  
2  
3 1 **Nature versus urban hiking for Veterans with posttraumatic stress disorder: a pilot randomized trial**  
4  
5 2 **conducted in the Pacific Northwest United States**  
6

7 3 Alyson J Littman<sup>1,2,3\*</sup>, Gregory N Bratman<sup>4,10</sup>, Keren Lehavot<sup>3,6,7</sup>, Charles C Engel<sup>3,6</sup>, John C Fortney<sup>3,5,6</sup>, Alexander  
8 4 Peterson<sup>2</sup>, Alex Jones<sup>8</sup>, Carolyn Klassen<sup>2</sup>, Josh Brandon<sup>9</sup>, Howard Frumkin<sup>10</sup>  
9

10 5  
11  
12 6 <sup>1</sup> Seattle Epidemiologic Research and Information Center, Department of Veterans Affairs Puget Sound Health  
13  
14 Care System, Seattle, WA  
15  
16 7

17 8 <sup>2</sup> Department of Epidemiology, School of Public Health, University of Washington, Seattle, WA  
18

19 9 <sup>3</sup> Seattle-Denver Center of Innovation for Veteran-Centered and Value-Driven Care, Department of Veterans  
20  
21 10 Affairs Puget Sound Health Care System, Seattle, WA  
22

23 11 <sup>4</sup> School of Environmental and Forest Sciences, University of Washington, Seattle, WA  
24  
25

26 12 <sup>5</sup> Department of Psychiatry and Behavioral Science, University of Washington, Seattle, WA  
27

28 13 <sup>6</sup> Department of Health Services, University of Washington School of Public Health, Seattle, WA  
29

30 14 <sup>8</sup> Outdoors for All, Seattle, WA  
31  
32

33 15 <sup>9</sup> Spirit of America  
34

35 16 <sup>10</sup> Department of Environmental and Occupational Health Sciences, School of Public Health, University of  
36  
37 17 Washington, Seattle, WA  
38

39 18  
40  
41 19 \* Corresponding author  
42  
43

44 20 Email: alyson@uw.edu  
45  
46

47 21  
48  
49

50 22  
51  
52

53 23  
54  
55

56 24  
57  
58

59  
60

1  
2  
3 **25 ABSTRACT**  
4

5 **26 Objectives:** To evaluate feasibility and acceptability of a group-based nature recreation intervention (nature  
6  
7 hiking) and control condition (urban hiking) for military Veterans with post-traumatic stress disorder (PTSD).  
8

9  
10 **28 Design and setting:** A pilot randomized controlled trial conducted in the U.S. Pacific Northwest.  
11

12 **29 Participants:** Veterans with PTSD due to any cause.  
13

14 **30 Interventions:** Twenty-six participants were randomized to a 12-week intervention involving either six nature  
15  
16 hikes (n=13) or six urban hikes (n=13).  
17

18  
19 **32 Primary and secondary outcome measures:** Feasibility was assessed based on recruitment, retention and  
20  
21 attendance. Questionnaires and post-intervention qualitative interviews were conducted to explore intervention  
22  
23 acceptability. Questionnaires assessing acceptability and outcomes planned for the future trial (e.g., PTSD  
24  
25 symptoms) were collected at baseline, 6-, 12- (immediately after the final hike) and 24-weeks follow-up.  
26

27  
28 **36 Results:** Of 415 people assessed for eligibility/interest, 97 were interested and passed preliminary eligibility  
29  
30 screening, and 26 were randomized. Mean completion of all questionnaires was 91% among those in the nature  
31  
32 hiking group and 68% in those in the urban hiking group. Over the course of the intervention, participants in the  
33  
34 nature and urban groups attended an average of 56% and 58%, respectively, of scheduled hikes. Acceptability of  
35  
36 both urban and nature hikes was high; over 70% reported a positive rating (i.e., good/excellent) for the hike  
37  
38 locations, distance, and pace. Median PTSD symptom scores (PTSD Checklist-5) improved more at 12- and 24-  
39  
40 weeks among those in the nature versus urban hiking group.  
41  
42

43  
44 **43 Conclusions:** This pilot study largely confirmed the feasibility and acceptability of nature hiking as a potential  
45  
46 treatment for Veterans with PTSD. Adaptations will be needed to improve recruitment and increase hike  
47  
48 attendance for a future randomized controlled trial to effectively test and isolate the ways in which nature  
49  
50 contact, physical activity, and social support conferred by the group impact outcomes.  
51

52 **47 Trial registration:** Clinicaltrials.gov (NCT03997344)  
53  
54  
55 **48**  
56  
57  
58  
59  
60

1  
2  
3 49 **Key words:** posttraumatic stress disorder, Veterans, nature, green exercise, pilot randomized controlled trial  
4  
5  
6 50

7  
8 51 **Strengths and limitations of the study**  
9

- 10 52 • By using group-based urban hiking as a comparison group to control for the effects of physical activity  
11  
12 53 and social cohesion (present in both interventions), this study was designed to isolate benefits  
13  
14 54 specifically due to the environment (which differed between the interventions).  
15  
16  
17 55 • We used population-based recruitment methods to enroll a representative sample of Veterans with  
18  
19 56 PTSD.  
20  
21 57 • Because of its small size and focus on feasibility, the study was not large enough to determine the  
22  
23 58 effectiveness of nature hiking on outcomes.  
24  
25  
26 59

27  
28 60 **Funding:** This work was funded by Recreational Equipment, Inc. (REI; Award/Grant number is not applicable)  
29  
30 61 and supported by equipment and outfitting contributions from Outdoor Research.  
31  
32 62

33  
34  
35 63 **Competing interests:** The authors have no competing interests to report.  
36

37 64 **Data availability statement:** Data are available upon reasonable request. Due to legal and ethical restrictions,  
38  
39 65 we are unable to share data publicly because the data contain potentially identifying and/or sensitive patient  
40  
41 66 information. Subject to IRB approval, de-identified data will be released to a local Department of Veterans  
42  
43 67 Affairs (VA) Puget Sound Health Care System and/or national VA research data repository for release to non-VA  
44  
45 68 protocols. The VA research data repository administrator will be responsible for reviewing and responding to  
46  
47 69 requests to release data to non-VA requestors. A data use agreement compliant with Veterans Health  
48  
49  
50 70 Administration Handbooks 1200.12 and 1605.1 will be required between Veterans Health Administration and  
51  
52 71 the requestor. Review and approval by VA privacy officer is required prior to disclosure. Data access requests  
53  
54  
55  
56  
57  
58  
59  
60

1  
2  
3  
4  
5  
6  
7  
8  
9  
10  
11  
12  
13  
14  
15  
16  
17  
18  
19  
20  
21  
22  
23  
24  
25  
26  
27  
28  
29  
30  
31  
32  
33  
34  
35  
36  
37  
38  
39  
40  
41  
42  
43  
44  
45  
46  
47  
48  
49  
50  
51  
52  
53  
54  
55  
56  
57  
58  
59  
60

72 will be reviewed by the IRB of the VA Puget Sound Health Care System (contact via Dr. Littman –  
73 alyson.littman@va.gov), via mail address: 1660 S Columbian Way, Building 101 – 5W41, Seattle, WA 98108.

For peer review only

## 74 Introduction

75 Posttraumatic Stress Disorder (PTSD) is a common, chronic mental health condition that affects up to 30% of  
76 military Veterans and is frequently comorbid with anxiety, depression, and substance misuse (1–3). PTSD  
77 increases the risk of suicide as well as obesity, physical inactivity, and cardiovascular and metabolic disorders (1–  
78 12). Clinical practice guidelines recommend treatment with several evidence-based psychotherapies and  
79 medications (13), but many Veterans who need PTSD treatment do not receive it (14). Barriers to obtaining  
80 treatment include concerns about medication side effects, desire for self-management approaches, stigma  
81 about receiving mental health care, and a lack of confidence in mental health treatment in general (14–17).  
82 These and other factors adversely impact engagement, contributing to low initiation of (14,18–22) and high  
83 drop-out rates from treatment (20,23,24). Identifying a wider range of approaches that are acceptable and  
84 effective is key to reducing the burden PTSD places on individuals and their communities.

85  
86 There is growing interest in nature contact as a potential therapy for Veterans with PTSD and robust evidence  
87 that nature contact improves physical and psychological health, among healthy individuals and those with  
88 mental health disorders (25). Nature contact has been shown to increase subjective well-being; decrease stress,  
89 anxiety, depression, and negative affect; and promote adaptive shifts in emotion regulation (25,26). Benefits of  
90 nature contact are generally posited to occur based on two theories: Attention Restoration Theory (ART) and  
91 Stress Recovery Theory (SRT) (27,28). ART theorizes that nature contact improves cognitive function through a  
92 replenishment of “directed attention”, a capacity that is overly taxed in urban environments due to the need to  
93 block out distracting stimuli (e.g., noise) to focus on a specific task or cognitive process. This depleted attention  
94 capacity can be restored in natural environments through the engagement of “soft fascination”, with  
95 implications for both cognitive and emotional well-being. SRT is based on psycho-evolutionary principles, and  
96 posits that many types of nature exposure enhance psychological well-being through a pre-cognitive, positive



1  
2  
3 97 affective response and activation of the parasympathetic nervous system in ways that reduce stress and  
4  
5 98 sympathetic nervous system arousal (26,29,30).  
6  
7  
8 99  
9  
10 100 Like nature contact, physical activity (PA) is considered to be a promising approach to improve outcomes for  
11  
12 101 individuals with PTSD. PA reduces anxiety and depression and improves stress regulation, sleep, and cognitive  
13  
14 102 functioning in the general population (10,11,31), and in people with PTSD, though only eight studies have  
15  
16 103 involved randomized controlled trial (RCT) designs (4,32–39), and five of the RCTs were pilot studies or included  
17  
18 104 fewer than 30 people (32,33,35,38,39). Furthermore, we are aware of only one RCT focused on Veterans (39).  
19  
20  
21 105 Group-based PA interventions may be particularly well-suited for military Veterans, due to 1) proportionally  
22  
23 106 higher rates of PTSD among Veterans (40), 2) consistency of PA interventions with values cultivated during  
24  
25 107 military service, and 3) benefits of social interaction with Veteran peers (41). To our knowledge, no PA  
26  
27 108 interventions in those with PTSD investigated the PA environment as a component of treatment. This is an  
28  
29 109 important omission, because the environment in which PA takes place may play an important role in its benefits  
30  
31 110 (42).  
32  
33  
34  
35 111  
36  
37  
38 112 Green exercise, defined as activity that takes place in natural environments, is a burgeoning area of research  
39  
40 113 (43–48). A number of studies have documented benefits from green exercise in Veteran populations and among  
41  
42 114 individuals with PTSD (45–55). The specific interventions studied (from care farming to river rafting),  
43  
44 115 dose/duration, and inclusion of additional, explicit therapeutic components vary substantially among studies. A  
45  
46 116 2019 systematic review that examined evidence for the proposed additive effects of exercise in the presence of  
47  
48 117 nature observed some benefits (e.g., lower perceived exertion and enjoyment), the authors concluded that  
49  
50 118 there was a high risk of bias across trials and an overall low quality of evidence (44). Thus, uncertainty about the  
51  
52 119 duration and impacts of green exercise remains due to methodological issues and because most interventional  
53  
54 120 studies tested only a single bout of exercise (43,44). Furthermore, in the studies including Veterans, important  
55  
56  
57  
58  
59  
60

1  
2  
3 121 limitations include low retention for follow-up, absence of control groups, and insufficient statistical power (52–  
4  
5 122 58).

6  
7  
8  
9 123  
10  
11 124 In addition to nature contact and PA, a third important component of many green exercise interventions  
12  
13 125 includes a group component. Some recent research suggests that increased social cohesion and connectedness  
14  
15 126 may mediate benefits of green exercise (59), but findings are inconsistent (60). Social support forged through  
16  
17  
18 127 group activity could be particularly relevant for Veterans, as camaraderie and solidarity are critical components  
19  
20 128 of military culture, and ones that are frequently lost in the return to civilian life (61). Social support is associated  
21  
22 129 with reduced PTSD symptoms and improved treatment response (62) and may directly impact stress response  
23  
24  
25 130 by increasing personal resources (63), and/or may indirectly impact PTSD symptom severity and response to  
26  
27 131 treatment through buffering the potentially harmful impacts of stressful events (64).

28  
29 132  
30  
31 133 Adequately powered studies involving ongoing green exercise that are designed to distinguish between benefits  
32  
33 134 due to PA and those due to the physical (e.g., nature) and social (e.g., group cohesion) environment are needed.  
34  
35  
36 135 Thus, our goal was to design and conduct a pilot study to test the feasibility and acceptability of a green exercise  
37  
38 136 intervention for PTSD symptoms in military Veterans, regardless of PTSD etiology. The intervention (nature  
39  
40 137 hiking) and the active control (urban hiking) were group-based and involved similar amounts of PA, to ensure  
41  
42 138 control of the potential benefits of the group-based social support and of PA. Figure 1 depicts our conceptual  
43  
44  
45 139 model. This paper describes the results of the initial pilot study designed to emulate important elements of the  
46  
47 140 future envisioned full-scale randomized trial.

## 48 49 141 50 51 142 **Methods**

1  
2  
3  
4  
5  
6  
7  
8  
9  
10  
11  
12  
13  
14  
15  
16  
17  
18  
19  
20  
21  
22  
23  
24  
25  
26  
27  
28  
29  
30  
31  
32  
33  
34  
35  
36  
37  
38  
39  
40  
41  
42  
43  
44  
45  
46  
47  
48  
49  
50  
51  
52  
53  
54  
55  
56  
57  
58  
59  
60

### 145 Identification and recruitment of participants

146 We used active and passive methods to identify and recruit Veterans to participate. While receiving care at a  
147 Department of Veterans Affairs (VA) health care facility was not an inclusion criterion, we used VA electronic  
148 medical records as a key source to identify potentially eligible Veterans. We identified VA enrollees (identified  
149 using electronic medical records) with at least one encounter with a diagnosis of PTSD in the prior two years; a  
150 zip code in one of three Seattle-Tacoma area counties (King, Snohomish, and Pierce); no hospitalizations in the  
151 prior 3 months; and no diagnoses of schizophrenia, bipolar disorder, or other psychotic disorder. We randomly  
152 selected 1001 individuals who met these criteria from a total of approximately 7000 and mailed them a letter  
153 informing them about the study and inviting them to participate. We followed the mailing with up to three  
154 phone calls until the recruitment period ended. We also placed study recruitment flyers in clinics in the VA Puget  
155 Sound and mailed flyers to four local organizations and clinics serving Veterans. Individuals who expressed an  
156 interest were mailed an invitation letter.

157  
158 We initially screened all Veterans who expressed an interest in participating for eligibility over the phone;  
159 inclusion criteria assessed included a history of PTSD, ability/willingness to comply with study procedures (e.g.,  
160 complete questionnaires, wear and sync an activity monitor, drive to hikes, and walk at least 2 hours at an  
161 easy/moderate pace over uneven terrain). Exclusion criteria assessed included a diagnosis of schizophrenia,  
162 bipolar disorder, or other psychotic disorder; hospital admission in the prior 3 months, and inability to perform  
163 unsupervised physical activity based on the Physical Activity Readiness Questionnaire (65). We invited those  
164 who passed all criteria except for the Physical Activity Readiness Questionnaire to obtain approval to participate  
165 from their primary care provider. Though some of this information was available in VA medical records, because  
166 we also included Veterans who did not have VA medical records, we employed methods that allowed us to  
167 evaluate eligibility without medical record access. Those who passed initial screening were mailed consent forms  
168 and given a link to complete a more extensive screening questionnaire online. Via the online screening

1  
2  
3 169 questionnaire, PTSD symptoms, drug use, alcohol misuse, and suicidality were assessed. PTSD was determined  
4  
5 170 based on a PTSD-checklist-5 (66) score  $\geq 33$ . We excluded those with drug abuse in past year (Drug Abuse  
6  
7  
8 171 Screening Test-10 (67) score  $< 3$ ); alcohol disorder/dependence (current/past year; Alcohol Use Disorders  
9  
10 172 Identification Test-10 (68) score  $> 16$ ); and moderate/severe suicidality (past month; MINI Suicidality module (69)  
11  
12 173 score  $\geq 5$ ). Those who were eligible and returned signed consents were considered enrolled in the study.  
13

#### 14 174 15 16 17 175 Study design

18  
19 176 We conducted a two-arm randomized controlled pilot trial. The two interventions were group nature and group  
20  
21 177 urban hiking. The random 1:1 allocation sequence was generated using simple randomization in random blocks  
22  
23 178 of 2, 4 and 6. Randomization assignments were placed in opaque sequentially numbered envelopes. Once an  
24  
25  
26 179 individual was determined to be eligible, the study coordinator selected the next envelope to determine the  
27  
28 180 individual's group assignment. We did not blind participants, the study coordinator, or the study statistician to  
29  
30 181 group assignment. This study was registered at Clinicaltrials.gov (NCT03997344). Figure 2 presents an overview  
31  
32 182 of the study, including timing of assessments.  
33

#### 34 183 35 36 37 184 Description of hike locations and amenities

38  
39 185 The criteria used to select the hike locations (which applied to both nature and urban hikes) included duration,  
40  
41 186 elevation change, availability of facilities (e.g., toilets and water), distance from participants' homes, and access  
42  
43  
44 187 to parking. Nature hikes were held in State Parks, National Wildlife Refuges, and Natural Resources Conservation  
45  
46 188 areas in the US Pacific Northwest. The nature hikes were in forest habitat, including old growth forest, saltwater  
47  
48 189 shoreline, waterfalls, and alpine lakes. Elevations ranged from sea level to 2200 feet above sea level. Urban  
49  
50 190 hikes were held in primarily built environments, avoiding urban parks or primarily residential neighborhoods  
51  
52 191 with substantial greenery or water features. Urban hikes comprised areas that included sports stadiums, urban  
53  
54  
55 192 art, and retail establishments and were mainly on sidewalks rather than separated bike/pedestrian paths/rail-

1  
2  
3 193 trails. It was not feasible to match nature and urban hikes on elevation change; instead, we aimed to have  
4  
5 194 similar hike durations to match total exertion. Generally, nature hikes involved somewhat shorter distances but  
6  
7  
8 195 included more elevation gain/loss.  
9

10 196

11  
12 197 Hiking intervention  
13

14 198 A total of 6 hikes over 12 weeks (one every other week) were offered between August and October 2019. We  
15  
16  
17 199 chose to offer 6 hikes (versus more or fewer) because this number was thought to be feasible and would be  
18  
19 200 sufficient to assess feasibility and acceptability. The standard structure for hikes was: 1) “ice breakers” (short,  
20  
21 201 guided conversations), 2) overview of the planned hike, including distance, unique features, and planned stops,  
22  
23 202 3) hike, and 4) post-hike debrief and administration of questionnaires. There were no additional  
24  
25  
26 203 group/therapeutic activities.  
27

28 204

29  
30 205 Hike durations increased gradually to account for anticipated increases in participants’ physical fitness. Initial  
31  
32 206 hikes were 60-90 minutes (2-3 miles), and later hikes were 2-3 hours (5-6 miles). To ensure safety and inclusion,  
33  
34  
35 207 one hike leader was in sight and hearing of the first participant and a second leader accompanied the last  
36  
37 208 participant. The group stopped at least every 30 minutes to keep everyone together and offer opportunities to  
38  
39 209 rest, regroup, and inquire about and address any issues or concerns arising since the last check-in.  
40

41 210

42  
43  
44 211 The same hike leaders, who were non-clinicians, led both nature and urban hikes to control for hike-leader  
45  
46 212 effects. On every hike, at least one of the leaders was a woman. Leaders were experienced outdoor educators  
47  
48 213 who were employed by a Seattle-based outdoor organization that provides outdoor recreation activities for  
49  
50 214 people with disabilities. While the leaders were not Veterans, the organization received grants from the VA as  
51  
52 215 part of the Adaptive Sports Program (70) and had previously led programs for Veterans. Leaders were trained to  
53

54

55

56

57

58

59

60

1  
2  
3 216 handle physical and mental health emergencies by the PIs (AJL and GNB) and a co-I who is a licensed clinical  
4  
5 217 psychologist (KL). AJL and GNB supervised the hike leaders during the study.  
6  
7  
8 218

9  
10 219 To reduce barriers to attendance, a \$35 incentive was provided to defray parking costs. We provided a rain  
11  
12 220 jacket and technical shirt as well as well as an activity monitor (Garmin vivosmart 4) at the participant's first  
13  
14 221 hike.  
15  
16  
17 222

### 18 19 223 Outcomes

20  
21 224 The primary outcomes of interest were feasibility and acceptability. **Feasibility** was assessed based on  
22  
23 225 recruitment statistics (the proportion of individuals who were contacted, eligible, and enrolled, as well as  
24  
25 226 reasons for ineligibility), retention (questionnaire completion), hike attendance, and safety (e.g., adverse  
26  
27 227 events). We aimed to recruit 36-45 participants (12-15 people allocated to each of the three groups - nature  
28  
29 228 hiking, urban hiking, and a no-hiking control group) and complete enrollment by July 2019 (approximately 3  
30  
31 229 months after recruitment began) due to concerns about weather for hikes later in the fall. Because of lower-  
32  
33 230 than-anticipated recruitment numbers, in late June, we decided to eliminate the no-hiking control group. At this  
34  
35 231 time, only one person was randomized to the no-hiking control group and informed of their group assignment;  
36  
37 232 that person was re-randomized after this decision was made. The target for retention and attendance was 70%,  
38  
39 233 a commonly cited standard for trials (71,72).  
40  
41  
42  
43  
44 234

45  
46 235 To assess **acceptability**, in the 6- and 12-week questionnaires, we included questions created for the study  
47  
48 236 about the difficulty of the hikes' distance, pace, and the terrain (rated on a 5-point scale from extremely difficult  
49  
50 237 to effortless), and satisfaction with the locations of hikes (rated on a 5-point scale from extremely unsatisfied to  
51  
52 238 very satisfied). Lastly, pre-hike and trailhead information and communication were assessed on a 5-point scale  
53  
54 239 (e.g., from very poor (1) to excellent (5)). We also included open-ended questions for participants to report what  
55  
56  
57  
58  
59  
60

1  
2  
3 240 they thought went well and what could have been better. Additionally, after the final hike, the lead author (AJL)  
4  
5 241 conducted semi-structured telephone interviews, with a goal to interview 10-15 participants. To include a range  
6  
7  
8 242 of perspectives, we purposively sampled participants from both arms, aimed to include men and women, and  
9  
10 243 participants who varied in terms of hike attendance. Questions inquired about participants' impressions of the  
11  
12 244 hikes, including difficulty, location, length of time, distance from home, hike leaders, and reasons hikes were  
13  
14 245 missed (if applicable); study communications; enrollment process; assessments; and other  
15  
16  
17 246 thoughts/impressions.

18  
19 247  
20  
21 248 Determination of **efficacy** was not a goal of this pilot RCT. The primary outcome of the future planned study is  
22  
23 249 PTSD symptoms, assessed by the PTSD-Checklist-5 (PCL-5), a 20-item instrument that assesses PTSD symptoms  
24  
25  
26 250 in the past month (range 0 to 80, with higher scores indicating greater symptom severity). Other outcome  
27  
28 251 measures of interest for the future planned study, which are detailed in Supplemental Table 1, include quality of  
29  
30 252 life (73), positive and negative affect (74,75), sleep (76), rumination (77), and cognitive reappraisal (78).

31  
32 253  
33  
34  
35 254 *Baseline and follow-up assessments*

36  
37 255 We conducted assessments online using commercial software (QuestionPro) at baseline (before hikes began),  
38  
39 256 and then weekly for 12 weeks, starting with the week of the first hike and ending the week after the 6<sup>th</sup> hike,  
40  
41 257 and finally at week 24; questionnaires completed immediately after the hikes were completed on paper. See  
42  
43  
44 258 Figure 2 for an overview and Supplemental Table 1 for measures at each time point. Questionnaires at weeks 6,  
45  
46 259 12, and 24 took approximately 30 minutes to complete. Questionnaires administered at weeks 1-5 and 7-11  
47  
48 260 included fewer measures and/or shortened versions and took 5-10 minutes to complete. Participants received  
49  
50 261 gift cards worth \$10 for completing questionnaires in weeks 1-5 and 7-11, \$20 for the 6-week questionnaire, and  
51  
52 262 \$50 for the 12- and 24-week questionnaires. In addition to questionnaires, to obtain objective information about  
53  
54  
55 263 PA (a potential mechanism of benefit, which we would want to measure precisely in a future study), we asked

1  
2  
3 264 participants to wear a wrist worn-activity monitor (Garmin vivosmart 4) every day, for at least 10 hours per day,  
4  
5 265 for the first 12 weeks of the study. No incentives were provided for wearing or synching the watch.  
6  
7

### 8 266 9 10 267 Data analysis

#### 11 12 268 *Quantitative analysis*

13  
14 269 The primary purpose of the extensive data collection was to evaluate feasibility of data collection rather than to  
15  
16  
17 270 estimate effect sizes because estimating effect sizes from small pilot studies is inherently imprecise (79). Thus,  
18  
19 271 instead of conducting hypothesis tests for effectiveness outcomes for which we were underpowered, we  
20  
21 272 present descriptive statistics (e.g., medians and interquartile ranges) for the primary outcome (PCL-5) only. For  
22  
23 273 acceptability measures related to communication, we categorized responses as positive if respondents chose  
24  
25 274 one of the two most favorable response options (e.g., satisfied/very satisfied; good/excellent) and not positive if  
26  
27 they chose one of the other response options (extremely unsatisfied/unsatisfied/ neither satisfied or unsatisfied;  
28 275 inadequate/very poor/adequate). We then calculated the proportion of urban and nature participants with  
29  
30 276 favorable responses for each question. In addition to proportions, we also calculated the mean scores for hike  
31  
32 277 locations, distance, pace, pre-hike information, pre-hike communication, and trailhead communication by  
33  
34 278 group.  
35  
36  
37 279  
38  
39 280  
40

#### 41 281 *Qualitative analysis*

42  
43 282 All interviews were recorded, and the interviewer took notes during interviews. For both the comments shared  
44  
45  
46 283 via open-ended questions on the questionnaire and comments shared orally during the interviews, we  
47  
48 284 conducted inductive content analysis, which involves open coding of data, organizing codes and data into  
49  
50 285 categories, and comparing data across participants to identify patterns and themes in the data (80).  
51  
52 286

#### 53 54 55 287 Patient and public involvement



1  
2  
3 288 Patients were involved in the design and conduct of this study. The study question and design were informed by  
4  
5 289 a Veteran with PTSD who served as a co-investigator. The design and messaging for this pilot study were also  
6  
7  
8 290 informed by a focus group of patients/Veterans who participated in a prior unpublished feasibility study.  
9

10 291

11  
12 292 Ethics approval

13  
14 293 This study was approved by the institutional review boards at the VA Puget Sound Health Care System (MIRB  
15  
16  
17 294 01738) and the University of Washington (6951).  
18

19 295

20

21 296

## 22 **Results**

23

### 24 297 Feasibility

25

#### 26 298 *Recruitment statistics*

27

28 299 Recruitment took place between April and August 2019 (16 weeks total). Of the 1001 patients mailed an  
29  
30 300 invitation letter, we were unable to assess interest or eligibility in 586 (because they did not respond to the  
31  
32 301 mailings and/or answer the phone when called; see Figure 3 for CONSORT diagram). Of the 415 with whom we  
33  
34  
35 302 made contact, 159 were not interested, 102 had health conditions that limited their walking/hiking, 36 had time  
36  
37 303 conflicts (e.g., work or church on Sundays or travel that would prevent participation), and 37 had other reasons  
38  
39 304 that they were unable to participate (e.g., moving out of the area, did not have PTSD, etc.). Of the 97 (81 from  
40  
41 305 letters + 16 from passive recruitment) interested who passed initial screening, 48 completed the online  
42  
43  
44 306 screening questionnaire. Twenty individuals were not eligible, 2 decided that they did not wish to participate,  
45  
46 307 and 26 were eligible and randomized. Of the 20 who were not eligible, 13 were ineligible because of a  
47  
48 308 moderate/high risk of suicide or skipping the question on suicidality, and 6 did not meet the threshold for PTSD.  
49  
50 309 Compared to those contacted and not randomized, a greater proportion of those randomized were women  
51  
52 310 (27% randomized versus 15% of those contacted), white (73% versus 63%), and Hispanic (8% versus 6%).  
53

54

55

56

57

58

59

60

1  
2  
3 311 Additionally, those who were randomized were younger (mean age = 47, range 25-65) than those not  
4  
5 312 randomized (mean age = 52, range: 21-95).  
6  
7  
8 313

9  
10 314 Table 1 presents characteristics of Veterans who were randomized and includes self-reported race/ethnicity,  
11  
12 315 which differed from race/ethnicity in the electronic medical record (reported above). Specifically, 42% of those  
13  
14 316 randomized self-reported being white, whereas the electronic medical record data indicated that 73% were  
15  
16  
17 317 white. Thirty percent had a college degree or more. Less than half worked full time and 46% had 100% VA  
18  
19 318 service-connected disability, indicating severe impairment in ability to work. Nearly two-thirds of participants  
20  
21 319 had served in combat and 68% had depressive symptoms based on the PHQ-8. Based on self-report, nearly 70%  
22  
23 320 met or exceeded PA guidelines of at least 75 minutes per week of vigorous-intensity activity or 150 minutes per  
24  
25  
26 321 week of moderate-intensity activity, or an equivalent combination of the two. At baseline (prior to study  
27  
28 322 initiation), 81% of participants reported hiking at least one time and 27% completed 7 or more hikes in the prior  
29  
30 323 year.  
31

### 32 324 33 34 35 325 *Retention (questionnaire completion)*

36  
37 326 Mean completion of all questionnaires was 91% in the nature hiking group and 68% in the urban hiking group.  
38  
39 327 Completion rates were similar for the shorter weekly questionnaires and the longer questionnaires.  
40

### 41 328 42 43 44 329 *Hike attendance*

45  
46 330 Over the course of the intervention, participants in the nature and urban groups attended an average of 56%  
47  
48 331 and 58%, respectively, of scheduled hikes. In the nature group, one person attended no hikes, four (31%)  
49  
50 332 attended 1-2 hikes, one attended 3 hikes, and seven (54%) attended 4-6 hikes. In the urban group, one person  
51  
52 333 attended no hikes, four (31%) attended 1-2 hikes, no one attended only 3 hikes, and eight (62%) attended 4-6  
53  
54  
55 334 hikes. Attendance was lower among women in the nature group (n=5, mean: 43%) than among women in the  
56  
57  
58  
59

1  
2  
3 335 urban group (n=2, 67%), whereas among men, hike attendance was similar in the two groups (65% versus 56%).  
4

5 336 Common reasons for missing hikes included work, childcare, and prior plans.  
6  
7

8 337

9  
10 338 *Safety/Adverse events*

11  
12 339 One participant in the urban hiking arm reported increased anxiety/PTSD symptoms in connection with hiking in  
13  
14 340 the urban environment and withdrew from the study.  
15

16  
17 341

18  
19 342 *Acceptability*

20  
21 343 *Quantitative findings*

22  
23 344 Acceptability of both the urban and nature hikes was high. Over 70% reported a positive rating for the hike  
24  
25 345 locations, distance, and pace; ratings were similar in the urban and nature hiking groups. Additionally, on  
26  
27 346 average, pre-hike information, pre-hike communication, and trailhead communication were rated as good to  
28  
29 347 excellent. Scores related to communication were similar in the urban and nature hike groups at 6 weeks, but  
30  
31 348 were lower in the urban hiking arm at 12 weeks (pre-hike information, mean scores: nature=4.4, urban=3.6; pre-  
32  
33 349 hike communication: nature=4.6, urban=3.8; trailhead communication: nature=4.6, urban=4.1)  
34  
35

36  
37 350

38  
39 351 *Qualitative findings*

40  
41 352 In response to the open-ended question on the questionnaire (“What went well so far?”), participants shared  
42  
43 353 positive comments such as “This group seems to mesh really well”, “all expectations were exceeded”, and “good  
44  
45 354 planning, leadership, and execution.” In response to the question, “What do you think we can do better?”,  
46  
47 355 suggestions included having regional groups, closer hikes or paying for gas; weekly (instead of every other week)  
48  
49 356 hikes; more team building and opportunities to socialize with others; and including more women and/or  
50  
51 357 women-only groups. Key themes from the qualitative interviews, which are presented in Table 2, echoed, and  
52  
53 358 elaborated on themes shared in the questionnaire. Most participants felt positively about their experience in the  
54  
55

56

57

58

59

60

1  
2  
3 359 study. As noted above, they liked getting to know other Veterans and having a “mission.” Veterans wanted to  
4  
5 360 find more ways of connecting with one another socially during hikes as well as outside of hikes. Hike logistics  
6  
7  
8 361 (e.g., distance from home) were noted as potential barriers to attendance.  
9

### 10 362 11 12 363 Efficacy measures 13

14 364 Median PCL-5 scores decreased from baseline to week 12 and remained at the 12-week level at week 24 for  
15  
16  
17 365 those in the nature hiking group (baseline=41, 12-weeks = 32, 24 weeks=31). Among those in the urban hiking  
18  
19 366 group, PCL-5 scores decreased from baseline to 12 weeks but increased nearly back to baseline levels at 24  
20  
21 367 weeks (baseline=48, 12-weeks = 43, 24 weeks=47) (Supplemental Figure 1). We did not test the statistical  
22  
23 368 significance of the changes because this pilot study was not designed to answer this question (81).  
24  
25

### 26 369 27 28 370 **Discussion** 29

30 371  
31  
32 372 This study was an important step in establishing feasibility and acceptability and identifying changes to consider  
33  
34  
35 373 in the development of a rigorous, fully-powered study to evaluate the impact of nature hiking on PTSD  
36  
37 374 symptoms. The results of this pilot study generally supported feasibility and acceptability. Participants reported  
38  
39 375 high acceptability, enjoyment, and value, based on quantitative and qualitative data. In both arms, more than half  
40  
41 376 of participants completed most hikes. Qualitative feedback about improving the social component supports the  
42  
43  
44 377 hypothesis that social connection is an important aspect of hikes, indicating a need to further develop the social  
45  
46 378 component and continue to study group interventions like this one. Additionally, the decrease in median scores  
47  
48 379 on the PCL-5 among those in the nature group after the 12-week hiking intervention, and 12 weeks later (week  
49  
50 380 24) is promising. This preliminary finding should be investigated more thoroughly in future, larger-scale versions  
51  
52 381 of our study. The indication that improvements may persist after the conclusion of the intervention is especially  
53  
54  
55 382 compelling given the current unknowns regarding the duration of effects of nature interventions.  
56  
57  
58  
59

1  
2  
3 383  
4  
5 384 Nevertheless, several issues need to be considered related to feasibility and acceptability for the next iteration  
6  
7  
8 385 of this research.

9  
10 386

11  
12 387 *Feasibility of recruitment*

13  
14 388 We fell short of our goal of recruiting at least 36 people over 4 months. Failing to meet recruitment goals in the  
15  
16  
17 389 planned timeframe is a common problem in randomized controlled trials (82). Barriers to recruitment included  
18  
19 390 unexpected delays, insufficient resources, and an inefficient recruitment process. Regarding delays, we had to  
20  
21 391 wait weeks for IRB approval for each proposed modification to recruitment materials/protocol. Regarding  
22  
23 392 resources, we only had 20 hours per week of paid staff time for recruitment. The addition of two volunteers in  
24  
25  
26 393 the final two months helped to accelerate enrollment, but more resources earlier in recruitment would have  
27  
28 394 been necessary to meet our goal.

29  
30 395

31  
32 396 One contributor to inefficiency in recruitment was the broad, population-based approach we employed for  
33  
34  
35 397 active recruitment. To identify patients for the introductory mailing, the only inclusion criteria were having a  
36  
37 398 single encounter in VA's electronic medical record with a PTSD diagnosis and living in one of three Puget Sound  
38  
39 399 counties. The only exclusion criteria were a diagnosis of schizophrenia, bipolar disorder, or other psychotic  
40  
41 400 disorder. Likely in part because of this broad approach, which did not include upper age limits, approximately  
42  
43  
44 401 one quarter of contacted individuals reported a health condition that impaired their walking. Burdensome study  
45  
46 402 procedures may have also impacted recruitment. About half of interested participants failed to complete the  
47  
48 403 online screening questionnaire and others informed us that they had trouble completing the online  
49  
50 404 questionnaire. Imposing an upper age limit (e.g., 65 years) and restructuring the recruitment process to make it  
51  
52 405 faster and easier for potential participants may be necessary.

53  
54  
55 406

56

57

58

59

1  
2  
3 407 Accessibility of the intervention and restrictive eligibility criteria may have also impacted recruitment. In  
4  
5 408 addition to being able to walk over uneven ground for at least two hours, participants also had to be available  
6  
7 409 during the times selected, have low suicide risk, and be free from physical conditions such as high blood  
8  
9  
10 410 pressure (or obtain their primary care provider's permission) among several other criteria. Changing inclusion  
11  
12 411 criteria (e.g., eliminating restrictions related to suicidality) might improve recruitment and generalizability, but  
13  
14 412 would require tradeoffs related to safety and retention that must be considered carefully.  
15  
16  
17 413

18  
19 414 Lastly, about 38% (159/415) of those for whom we were able to assess eligibility and interest declined  
20  
21 415 participation. While some of these people may have declined because of the additional burdens of a research  
22  
23 416 study, this statistic indicates that hiking may only appeal to a segment of the population, just as psychotherapy  
24  
25 417 and pharmacotherapy only appeal to subsets of the population (83). Because of differences in treatment  
26  
27  
28 418 preferences, offering options is important, and nature hiking merits consideration so that we can rigorously  
29  
30 419 assess its efficacy.  
31

### 32 420 33 34 35 421 *Retention*

36  
37 422 Retention varied by group and was poorer for the wrist-worn activity monitor than for the questionnaires. The  
38  
39 423 activity monitor had a substantial amount of missing data, which is a common problem for activity monitors  
40  
41 424 (84), and may have been related to the number of technical steps required for setting up the watch and syncing  
42  
43 425 it, as many participants needed additional help to troubleshoot problems. Providing more support to set up the  
44  
45  
46 426 watch and incentives to wear and sync it may help to obtain more complete data. While overall questionnaire  
47  
48 427 completion was high, it was higher in the nature hiking group (91%) than in the urban hiking group (68%).  
49  
50 428 Though the small sample and our inability to conduct interviews with those who did not complete follow-up  
51  
52 429 measures makes inference difficult, the retention differences could be a marker of commitment to the study.  
53  
54  
55 430 Future studies should pay careful attention to marketing the study to ensure that both interventions are  
56  
57  
58  
59  
60

1  
2  
3 431 perceived as helpful. Enhancing the social aspects of the interventions may help achieve that goal. The  
4  
5 432 difference in incentives provided for questionnaire completion versus the other aspects of the study may also  
6  
7  
8 433 have played a role in retention for different study aspects. However, many participants shared that they  
9  
10 434 participated to help fellow Veterans, indicating altruistic/intrinsic motivators for participation, reinforcing the  
11  
12 435 importance of understanding drivers of participation, and reducing barriers and enhancing facilitators.

13  
14 436  
15

16  
17 437 *Acceptability of the hiking interventions*

18  
19 438 Hike attendance (56%) was lower than our target (70%) and women had lower attendance in the nature hiking  
20  
21 439 group than men. While we were unable to ascertain reasons for missing hikes for each person, some reasons  
22  
23 440 reported (e.g., other plans, work) were hard to avoid, while others (driving distance to hikes) could be addressed  
24  
25  
26 441 in the future by restricting the geographic area of recruitment and hikes and/or organizing small groups at  
27  
28 442 different times to accommodate individuals' schedules. Our study, unfortunately, does not shed light on the  
29  
30 443 optimal hike "dose." We suspect that 8-12 hikes (similar to a standard psychotherapy course) may be optimal  
31  
32 444 for achieving clinically meaningful results. Additional research will be necessary to examine this important  
33  
34  
35 445 question. There were also an indication of lower acceptability/ratings for information sharing in the urban hiking  
36  
37 446 versus the nature hiking groups. While we aimed to share information about the urban area, we did not provide  
38  
39 447 an exact route, which may have made it more difficult for participants to research urban versus nature hikes,  
40  
41 448 where we listed a trail. Providing a map of the route might help participants feel prepared. Regarding  
42  
43  
44 449 differences in attendance by gender, a history of military sexual trauma, which is common among women  
45  
46 450 Veterans (85), may have impacted some women participants' comfort and perception of safety of hiking in  
47  
48 451 nature with a majority male group. Ensuring a greater proportion of women in each group or organizing women-  
49  
50 452 only groups (as was suggested by some participants) could address this concern. These changes, would,  
51  
52 453 however, result in additional costs and tradeoffs that would need to be carefully considered.  
53  
54  
55 454

56  
57  
58  
59  
60

1  
2  
3 455 *Conclusions*  
4

5 456 This pilot study provided useful information related to feasibility and acceptability, including common factors  
6  
7  
8 457 that resulted in exclusion; resources and procedures needed for recruitment; factors to consider for selection of  
9  
10 458 nature and urban hikes; and barriers and facilitators to achieving high completion in follow-up assessments and  
11  
12 459 the hikes. These insights can be harnessed to increase participation and rigor in future, scaled-up iterations of  
13  
14 460 the study, and ensure that environments are safe (i.e., non-triggering). Future studies with larger sample sizes  
15  
16  
17 461 are needed to isolate the ways nature contact, PA, and social support conferred by the group impact outcomes  
18  
19 462 to develop and provide well-tailored interventions.  
20



1  
2  
3 465 **List of abbreviations**  
4

|          |       |                                                        |
|----------|-------|--------------------------------------------------------|
| 5 466    | ART   | Attention Restoration Theory                           |
| 6        |       |                                                        |
| 7 467    | HIPAA | Health Insurance Portability and Accountability Act    |
| 8        |       |                                                        |
| 9 10468  | IRB   | Institutional Review Board                             |
| 10       |       |                                                        |
| 11 12469 | PA    | Physical activity                                      |
| 12       |       |                                                        |
| 13 14470 | PCL-5 | PTSD Checklist for Diagnostic and Statistical Manual 5 |
| 14       |       |                                                        |
| 15 16471 | PTSD  | Posttraumatic stress disorder                          |
| 16       |       |                                                        |
| 17 19472 | SRT   | Stress Recovery Theory                                 |
| 18       |       |                                                        |
| 19 21473 | VA    | Department of Veterans Affairs                         |
| 20       |       |                                                        |
| 21 23474 |       |                                                        |
| 22       |       |                                                        |
| 23       |       |                                                        |
| 24       |       |                                                        |
| 25 26475 |       |                                                        |

25 26475 **Acknowledgements**  
27

28476 We thank the Veterans who participated in this study for allowing us to learn from them, including the Veterans  
29  
30477 who participated in a prior unpublished feasibility study. We also thank Morgan Meadows and Gabrielle Fong  
31  
32478 for their help with recruitment. This material is the result of work supported by VA Puget Sound Health Care  
33  
34479 System, Seattle, WA. The views expressed in this article are those of the authors and do not necessarily reflect  
35  
36  
37480 the position or policy of the Department of Veterans Affairs, the United States Government, Recreational  
38  
39481 Equipment, Inc. (REI), or Outdoor Research.  
40

41  
42482  
43  
44  
45483 **Contributors:** AJL, GNB, CCE, JCF, KL, JB, and HF conceptualized the study and contributed to the intervention  
46  
47484 development and design. AJL and GNB oversaw the conduct of the trial all the authors contributed to the  
48  
49485 ongoing management of the trial. AJL, GNB, MM, AP, and CK oversaw data collection and data analysis. The  
50  
51486 manuscript was drafted by AJL. All the authors contributed to the interpretation of the findings and revised and  
52  
53  
54487 reviewed the paper.  
55

56488

57

58

59

60

## References

1. Gates MA, Holowka DW, Vasterling JJ, et al. Posttraumatic stress disorder in veterans and military personnel: Epidemiology, screening, and case recognition. *Psychol. Serv.* 2012;9(4):361–382.
2. Fulton JJ, Calhoun PS, Wagner HR, et al. The prevalence of posttraumatic stress disorder in Operation Enduring Freedom/Operation Iraqi Freedom (OEF/OIF) Veterans: A meta-analysis. *J. Anxiety Disord.* 2015;31:98–107.
3. Schlenger WE, Kulka RA, Fairbank JA, et al. The prevalence of post-traumatic stress disorder in the Vietnam generation: A multimethod, multisource assessment of psychiatric disorder. *J. Trauma. Stress* [electronic article]. 1992;5(3):333–363. (<http://doi.wiley.com/10.1002/jts.2490050303>). (Accessed January 13, 2020)
4. Hall KS, Hoerster KD, Yancy WS. Post-traumatic stress disorder, physical activity, and eating behaviors. *Epidemiol. Rev.* 2015;37(1):103–115.
5. Warburton DER, Bredin SSD. Health benefits of physical activity: A systematic review of current systematic reviews. *Curr. Opin. Cardiol.* 2017;32(5):541–556.
6. Veterans Health Administration. Analysis of VA Health Care Utilization among Operation Enduring Freedom (OEF), Operation Iraqi Freedom (OIF), and Operation New Dawn (OND) Veterans. 2013 1–13 p.(<http://www.publichealth.va.gov/epidemiology/reports/oefoifond/health-care-utilization/index.asp>)
7. Kang HK, Li B, Mahan CM, et al. Health of US veterans of 1991 Gulf War: A follow-up survey in 10 years. *J. Occup. Environ. Med.* [electronic article]. 2009;51(4):401–410. (<https://insights.ovid.com/crossref?an=00043764-200904000-00003>). (Accessed January 13, 2020)
8. Magruder KM, McLaughlin KA, Elmore Borbon DL. Trauma is a public health issue. *Eur. J. Psychotraumatol.* 2017;8(1):1375338.
9. Gupta MA. Review of somatic symptoms in post-traumatic stress disorder. *Int. Rev. Psychiatry.* 2013;25(1):86–99.

- 1  
2  
3 513 10. Ginzburg K, Ein-Dor T, Solomon Z. Comorbidity of posttraumatic stress disorder, anxiety and depression:  
4  
5 514 A 20-year longitudinal study of war veterans. *J. Affect. Disord.* 2010;123(1–3):249–257.  
6  
7  
8 515 11. Frayne SM, Seaver MR, Loveland S, et al. Burden of medical illness in women with depression and  
9  
10516 posttraumatic stress disorder. *Arch. Intern. Med.* 2004;  
11  
12517 12. Dedert EA, Calhoun PS, Watkins LL, et al. Posttraumatic stress disorder, cardiovascular, and metabolic  
13  
14518 disease: A review of the evidence. *Ann. Behav. Med.* 2010;39(1):61–78.  
15  
16  
17519 13. The Management of Posttraumatic Stress Disorder Work Group. VA/DoD Clinical Practice Guidelines for  
18  
19520 the Management of Posttraumatic Stress Disorder and Acute Stress Disorder. 2017 1–200 p.  
20  
21521 14. Hoge CW, Castro CA, Messer SC, et al. Combat duty in Iraq and Afghanistan, mental health problems, and  
22  
23522 barriers to care. *N. Engl. J. Med.* 2004;351(1):13–22.  
24  
25  
26523 15. Sharp ML, Fear NT, Rona RJ, et al. Stigma as a barrier to seeking health care among military personnel  
27  
28524 with mental health problems. *Epidemiol. Rev.* 2015;37(1):144–162.  
29  
30525 16. Wang PS, Berglund P, Olfson M, et al. Failure and delay in initial treatment contact after first onset of  
31  
32526 mental disorders in the National Comorbidity Survey Replication. *Arch. Gen. Psychiatry.* 2005;62(6):603–  
33  
34  
35527 613.  
36  
37528 17. Stecker T, Shiner B, Watts B V., et al. Treatment-seeking barriers for veterans of the Iraq and Afghanistan  
38  
39529 conflicts who screen positive for PTSD. *Psychiatr. Serv.* 2013;64(3):280–283.  
40  
41530 18. Hoge CW, Grossman SH, Auchterlonie JL, et al. PTSD treatment for soldiers after combat deployment:  
42  
43531 Low utilization of mental health care and reasons for dropout. *Psychiatr. Serv.* 2014;65(8):997–1004.  
44  
45  
46532 19. Hundt NE, Helm A, Smith TL, et al. Failure to engage: A qualitative study of veterans who decline  
47  
48533 evidence-based psychotherapies for PTSD. *Psychol. Serv.* 2018;15(4):536–542.  
49  
50534 20. Goetter EM, Bui E, Ojserkis RA, et al. A Systematic Review of Dropout From Psychotherapy for  
51  
52535 Posttraumatic Stress Disorder Among Iraq and Afghanistan Combat Veterans. *J. Trauma. Stress.*  
53  
54  
55536 2015;28(5):401–409.  
56  
57  
58  
59  
60

1  
2  
3  
4  
5  
6  
7  
8  
9  
10  
11  
12  
13  
14  
15  
16  
17  
18  
19  
20  
21  
22  
23  
24  
25  
26  
27  
28  
29  
30  
31  
32  
33  
34  
35  
36  
37  
38  
39  
40  
41  
42  
43  
44  
45  
46  
47  
48  
49  
50  
51  
52  
53  
54  
55  
56  
57  
58  
59  
60

- 537 21. Foa EB, McLean CP, Zang Y, et al. Effect of Prolonged Exposure Therapy Delivered Over 2 Weeks vs 8  
538 Weeks vs Present-Centered Therapy on PTSD Symptom Severity in Military Personnel A Randomized  
539 Clinical Trial. *JAMA - J. Am. Med. Assoc.* 2018;319(4):354–364.
- 540 22. Rauch SAM, Kim HM, Powell C, et al. Efficacy of Prolonged Exposure Therapy, Sertraline Hydrochloride,  
541 and Their Combination among Combat Veterans with Posttraumatic Stress Disorder: A Randomized  
542 Clinical Trial. *JAMA Psychiatry.* 2019;76(2):117–126.
- 543 23. Kehle-Forbes SM, Meis LA, Spoont MR, et al. Treatment Initiation and Dropout from Prolonged Exposure  
544 and Cognitive Processing Therapy in a VA Outpatient Clinic. *Psychol. Trauma Theory, Res. Pract. Policy.*  
545 2016;8(1):107–114.
- 546 24. Keefe JR, Wiltsey Stirman S, Cohen ZD, et al. In rape trauma PTSD, patient characteristics indicate which  
547 trauma-focused treatment they are most likely to complete. *Depress. Anxiety.* 2018;35(4):330–338.
- 548 25. Frumkin H, Bratman GN, Breslow SJ, et al. Nature contact and human health: A research agenda. *Environ.*  
549 *Health Perspect.* 2017;125(7).
- 550 26. Bratman GN, Olvera-Alvarez HA, Gross JJ. The affective benefits of nature exposure. *Soc. Personal.*  
551 *Psychol. Compass* [electronic article].  
552 2021;(https://onlinelibrary.wiley.com/doi/abs/10.1111/spc3.12630). (Accessed July 13, 2021)
- 553 27. Kaplan S. The restorative benefits of nature: Toward an integrative framework. *J. Environ. Psychol.*  
554 1995;15(3):169–182.
- 555 28. Ulrich RS, Simons RF, Losito BD, et al. Stress recovery during exposure to natural and urban  
556 environments. *J. Environ. Psychol.* 1991;11(3):201–230.
- 557 29. van den Berg MMHE, Maas J, Muller R, et al. Autonomic nervous system responses to viewing green and  
558 built settings: Differentiating between sympathetic and parasympathetic activity. *Int. J. Environ. Res.*  
559 *Public Health.* 2015;12(12):15860–15874.
- 560 30. Kobayashi H, Song C, Ikei H, et al. Analysis of Individual Variations in Autonomic Responses to Urban and

- 1  
2  
3 561 Forest Environments. *Evidence-based Complement. Altern. Med.* 2015;2015.  
4  
5 562 31. Whitworth JW, Ciccolo JT. Exercise and Post-Traumatic Stress Disorder in Military Veterans: A Systematic  
6  
7 Review. *Mil. Med.* 2016;181(9):953–960.  
8 563  
9  
10 564 32. Kim SH, Schneider SM, Bevans M, et al. PTSD symptom reduction with mindfulness-based stretching and  
11  
12 565 deep breathing exercise: Randomized controlled clinical trial of efficacy. *J. Clin. Endocrinol. Metab.*  
13  
14 566 2013;98(7):2984–2992.  
15  
16  
17 567 33. Mitchell KS, Dick AM, Dimartino DM, et al. A Pilot Study of a Randomized Controlled Trial of Yoga as an  
18  
19 568 Intervention for PTSD Symptoms in Women. *J. Trauma. Stress.* 2014;27(2):121–128.  
20  
21 569 34. Van Der Kolk BA, Stone L, West J, et al. Yoga as an adjunctive treatment for posttraumatic stress disorder:  
22  
23 570 A randomized controlled trial. *J. Clin. Psychiatry.* 2014;75(6).  
24  
25  
26 571 35. Powers MB, Medina JL, Burns S, et al. Exercise Augmentation of Exposure Therapy for PTSD: Rationale  
27  
28 572 and Pilot Efficacy Data. *Cogn. Behav. Ther.* 2015;44(4):314–327.  
29  
30 573 36. Rosenbaum S, Sherrington C, Tiedemann A. Exercise augmentation compared with usual care for post-  
31  
32 574 traumatic stress disorder: A randomized controlled trial. *Acta Psychiatr. Scand.* 2015;131(5):350–359.  
33  
34  
35 575 37. Goldstein LA, Mehling WE, Metzler TJ, et al. Veterans Group Exercise: A randomized pilot trial of an  
36  
37 576 Integrative Exercise program for veterans with posttraumatic stress. *J. Affect. Disord.* 2018;227:345–352.  
38  
39 577 38. Whitworth JW, Nosrat S, SantaBarbara NJ, et al. Feasibility of Resistance Exercise for Posttraumatic Stress  
40  
41 578 and Anxiety Symptoms: A Randomized Controlled Pilot Study. *J. Trauma. Stress* [electronic article].  
42  
43 579 2019;32(6):977–984. (<http://www.ncbi.nlm.nih.gov/pubmed/31743507>). (Accessed April 18, 2020)  
44  
45  
46 580 39. Hall KS, Morey MC, Beckham JC, et al. Warrior Wellness: A Randomized Controlled Pilot Trial of the  
47  
48 581 Effects of Exercise on Physical Function and Clinical Health Risk Factors in Older Military Veterans With  
49  
50 582 PTSD. *J. Gerontol. A. Biol. Sci. Med. Sci.* 2020;75(11):2130–2138.  
51  
52 583 40. Lehavot K, Katon JG, Chen JA, et al. Post-traumatic Stress Disorder by Gender and Veteran Status. *Am. J.*  
53  
54  
55 584 *Prev. Med.* 2018;54(1):e1–e9.  
56  
57  
58  
59  
60

1  
2  
3  
4  
5  
6  
7  
8  
9  
10  
11  
12  
13  
14  
15  
16  
17  
18  
19  
20  
21  
22  
23  
24  
25  
26  
27  
28  
29  
30  
31  
32  
33  
34  
35  
36  
37  
38  
39  
40  
41  
42  
43  
44  
45  
46  
47  
48  
49  
50  
51  
52  
53  
54  
55  
56  
57  
58  
59  
60

- 585 41. Hundt NE, Robinson A, Arney J, et al. Veterans' perspectives on benefits and drawbacks of peer support  
586 for posttraumatic stress disorder. *Mil. Med.* [electronic article]. 2015;180(8):851–856.  
587 (<https://academic.oup.com/milmed/article/180/8/851/4160556>). (Accessed July 13, 2021)
- 588 42. Pretty J, Peacock J, Sellens M, et al. The mental and physical health outcomes of green exercise. *Int. J.*  
589 *Environ. Health Res.* [electronic article]. 2005;15(5):319–337. ([https://www-tandfonline-](https://www-tandfonline-com.offcampus.lib.washington.edu/doi/abs/10.1080/09603120500155963)  
590 [com.offcampus.lib.washington.edu/doi/abs/10.1080/09603120500155963](https://www-tandfonline-com.offcampus.lib.washington.edu/doi/abs/10.1080/09603120500155963)). (Accessed June 24, 2021)
- 591 43. Thompson Coon J, Boddy K, Stein K, et al. Does participating in physical activity in outdoor natural  
592 environments have a greater effect on physical and mental wellbeing than physical activity indoors? A  
593 systematic review. *Environ. Sci. Technol.* [electronic article]. 2011;45(5):1761–1772.  
594 ([https://pubs.acs.org/doi/abs/10.1021/es102947t?casa\\_token=D\\_eiqOzCftwAAAAA:72zfajf8uJe89tgt1oO](https://pubs.acs.org/doi/abs/10.1021/es102947t?casa_token=D_eiqOzCftwAAAAA:72zfajf8uJe89tgt1oOdpMNZeUoYTKGjFUEpNLopojrQ2bPRK9VHjcOiJ0y1IRMvFmtjgAa2x2cS56I)  
595 [dpMNZeUoYTKGjFUEpNLopojrQ2bPRK9VHjcOiJ0y1IRMvFmtjgAa2x2cS56I](https://pubs.acs.org/doi/abs/10.1021/es102947t?casa_token=D_eiqOzCftwAAAAA:72zfajf8uJe89tgt1oOdpMNZeUoYTKGjFUEpNLopojrQ2bPRK9VHjcOiJ0y1IRMvFmtjgAa2x2cS56I)). (Accessed July 13, 2021)
- 596 44. Lahart I, Darcy P, Gidlow C, et al. The effects of green exercise on physical and mental wellbeing: A  
597 systematic review. *Int. J. Environ. Res. Public Health* [electronic article]. 2019;16(8):1352.  
598 (<https://www.mdpi.com/1660-4601/16/8/1352/htm>). (Accessed July 13, 2021)
- 599 45. Annerstedt M, Währborg P. Nature-assisted therapy: Systematic review of controlled and observational  
600 studies. *Scand. J. Public Health.* 2011;39(4):371–388.
- 601 46. Barton J, Pretty J. What is the best dose of nature and green exercise for improving mental health- A  
602 multi-study analysis. *Environ. Sci. Technol.* 2010;44(10):3947–3955.
- 603 47. Wolsko C, Lindberg K, Reese R. Nature-Based Physical Recreation Leads to Psychological Well-Being:  
604 Evidence from Five Studies. *Ecopsychology.* 2019;11(4):222–235.
- 605 48. Marselle MR, Irvine KN, Warber SL. Walking for well-being: Are group walks in certain types of natural  
606 environments better for well-being than group walks in urban environments? *Int. J. Environ. Res. Public*  
607 *Health.* 2013;10(11):5603–5628.
- 608 49. Kyriakopoulos A. How individuals with self-reported anxiety and depression experienced a combination

- 1  
2  
3 609 of individual counselling with an adventurous outdoor experience: A qualitative evaluation. *Couns.*  
4  
5 610 *Psychother. Res.* 2011;11(2):120–128.  
6  
7  
8 611 50. Bennett JL, Lundberg NR, Zabriskie R, et al. Addressing posttraumatic stress among Iraq and Afghanistan  
9  
10 612 veterans and significant others: An intervention utilizing sport and recreation. *Ther. Recreation J.*  
11  
12 613 [electronic article]. 2014;48(1):74–93.  
13  
14 614 ([http://connection.ebscohost.com/c/articles/94357429/addressing-posttraumatic-stress-among-iraq-](http://connection.ebscohost.com/c/articles/94357429/addressing-posttraumatic-stress-among-iraq-afghanistan-veterans-significant-others-intervention-utilizing-sport-recreation)  
15  
16 615 [afghanistan-veterans-significant-others-intervention-utilizing-sport-recreation](http://connection.ebscohost.com/c/articles/94357429/addressing-posttraumatic-stress-among-iraq-afghanistan-veterans-significant-others-intervention-utilizing-sport-recreation))  
17  
18  
19 616 51. Bennett JL, Piatt JA, Van Puymbroeck M. Outcomes of a Therapeutic Fly-Fishing Program for Veterans  
20  
21 617 with Combat-Related Disabilities: A Community-Based Rehabilitation Initiative. *Community Ment. Health*  
22  
23 618 *J.* [electronic article]. 2017;53(7):756–765. (<http://www.ncbi.nlm.nih.gov/pubmed/28303444>). (Accessed  
24  
25 619 January 25, 2020)  
26  
27  
28 620 52. Dustin DL, Dustin D, Bricker N, et al. The Promise of River Running as a Therapeutic Medium for Veterans  
29  
30 621 Coping with Post-Traumatic Stress Disorder. *Ther. Recreation J.* 2011;XIV(4):326–340.  
31  
32 622 53. Duvall J, Kaplan R. Enhancing the well-being of veterans using extended group-based nature recreation  
33  
34 623 experiences. *J. Rehabil. Res. Dev.* 2014;51(5):685–696.  
35  
36  
37 624 54. Gelkopf M, Hasson-Ohayon I, Bikman M, et al. Nature adventure rehabilitation for combat-related  
38  
39 625 posttraumatic chronic stress disorder: A randomized control trial. *Psychiatry Res.* 2013;209(3):485–493.  
40  
41 626 55. Hyer L, Boyd S, Scurfield R, et al. Effects of outward bound experience as an adjunct to inpatient PTSD  
42  
43 627 treatment of war veterans. *J. Clin. Psychol.* 1996;52(3):263–278.  
44  
45  
46 628 56. Anderson CL, Monroy M, Keltner D. Awe in nature heals: Evidence from military veterans, at-risk youth,  
47  
48 629 and college students. *Emotion* [electronic article]. 2018;18(8):1195–1202. (/record/2018-27538-001).  
49  
50 630 (Accessed July 13, 2021)  
51  
52 631 57. Poulsen DV, Stigsdotter UK, Refshage AD. Whatever happened to the soldiers? Nature-assisted therapies  
53  
54 632 for veterans diagnosed with post-traumatic stress disorder: A literature review. *Urban For. Urban Green.*  
55  
56  
57  
58  
59  
60

1  
2  
3  
4  
5  
6  
7  
8  
9  
10  
11  
12  
13  
14  
15  
16  
17  
18  
19  
20  
21  
22  
23  
24  
25  
26  
27  
28  
29  
30  
31  
32  
33  
34  
35  
36  
37  
38  
39  
40  
41  
42  
43  
44  
45  
46  
47  
48  
49  
50  
51  
52  
53  
54  
55  
56  
57  
58  
59  
60

633 2015;14(2):438–445.

58. Greenleaf AT, Roessger KM. Effectiveness of care farming on veterans' life satisfaction, optimism, and perceived loneliness. *J. Humanist. Couns.* [electronic article]. 2017;56(2):86–110.

(<https://www.researchgate.net/publication/310952083>). (Accessed June 23, 2021)

59. Jennings V, Bamkole O. The relationship between social cohesion and urban green space: An avenue for health promotion. *Int. J. Environ. Res. Public Health* [electronic article]. 2019;16(3). (<https://pubmed.ncbi.nlm.nih.gov/officecampus.lib.washington.edu/30720732/>). (Accessed March 26, 2021)

60. Johansson M, Hartig T, Staats H. Psychological benefits of walking: Moderation by company and outdoor environment. *Appl. Psychol. Heal. Well-Being* [electronic article]. 2011;3(3):261–280. ([https://iaap-journals.onlinelibrary.wiley.com/doi/abs/10.1111/j.1758-0854.2011.01051.x?casa\\_token=cK-FtOYj7esAAAAA:gZLWakx7HxBuIORgOibMRxWA-nJ2tXPYmo89Mdbq13wOUyAFc28dj0Lhvowu-ePO4ic5agHycVmx-6g](https://iaap-journals.onlinelibrary.wiley.com/doi/abs/10.1111/j.1758-0854.2011.01051.x?casa_token=cK-FtOYj7esAAAAA:gZLWakx7HxBuIORgOibMRxWA-nJ2tXPYmo89Mdbq13wOUyAFc28dj0Lhvowu-ePO4ic5agHycVmx-6g)). (Accessed July 1, 2021)

61. Junger S. *Tribe: on homecoming and belonging*. New York, NY: Hatchette; 2016.

62. Price M, Lancaster CL, Gros DF, et al. An Examination of Social Support and PTSD Treatment Response During Prolonged Exposure. *Psychiatry (New York)*. 2018;81(3):258–270.

63. Zang Y, Gallagher T, McLean CP, et al. The impact of social support, unit cohesion, and trait resilience on PTSD in treatment-seeking military personnel with PTSD: The role of posttraumatic cognitions. *J. Psychiatr. Res.* 2017;86:18–25.

64. Cohen S, Wills TA. Stress, Social Support, and the Buffering Hypothesis. *Psychol. Bull.* 1985;98(2):310–357.

65. Thomas S, Reading J, Shephard RJ. Revision of the Physical Activity Readiness Questionnaire (PAR-Q). *Can. J. Sport Sci.* 1992;17(4):338–345.

66. Weathers FW, Litz BT, Keane TM, et al. The PTSD Checklist for DSM-5 (PCL-5). *Natl. Cent. PTSD*. 2013;5(August):2002.



- 1  
2  
3 657 67. Yudko E, Lozhkina O, Fouts A. A comprehensive review of the psychometric properties of the Drug Abuse  
4  
5 658 Screening Test. *J. Subst. Abuse Treat.* 2007;32(2):189–198.  
6  
7  
8 659 68. Saunders JB, Aasland OG, Babor TF, et al. Development of the Alcohol Use Disorders Identification Test  
9  
10 660 (AUDIT): WHO Collaborative Project on Early Detection of Persons with Harmful Alcohol Consumption-II.  
11  
12 661 *Addiction.* 1993;88(6):791–804.  
13  
14 662 69. Sheehan D V., Lecrubier Y, Sheehan KH, et al. The Mini-International Neuropsychiatric Interview  
15  
16 663 (M.I.N.I.): The development and validation of a structured diagnostic psychiatric interview for DSM-IV  
17  
18 664 and ICD-10. In: *Journal of Clinical Psychiatry.* 1998:22–33.  
19  
20  
21 665 70. US Department of Veterans Affairs. Veterans Health Administration VA Adaptive Sports & Therapeutic  
22  
23 666 Arts: Grant Program. (<https://www.blogs.va.gov/nvspse/>). (Accessed June 28, 2021)  
24  
25  
26 667 71. Ribisl KM, Walton MA, Mowbray CT, et al. Minimizing participant attrition in panel studies through the  
27  
28 668 use of effective retention and tracking strategies: Review and recommendations. *Eval. Program Plann.*  
29  
30 669 1996;19(1):1–25.  
31  
32 670 72. Solomon P, Cavanaugh MM, Draine J. Randomized Controlled Trials: Design and Implementation for  
33  
34 671 Community-Based Psychosocial Interventions. *Randomized Control. Trials Des. Implement. Community-*  
35  
36 672 *Based Psychosoc. Interv.* 2009;1–224.  
37  
38  
39 673 73. Diener E, Emmons RA, Larsen RJ, et al. The Satisfaction With Life Scale. *J. Pers. Assess.* 1985;49(1):71–75.  
40  
41 674 74. Crawford JR, Henry JD. The Positive and Negative Affect Schedule (PANAS): Construct validity,  
42  
43 675 measurement properties and normative data in a large non-clinical sample. *Br. J. Clin. Psychol.*  
44  
45 676 2004;43(3):245–265.  
46  
47  
48 677 75. Thompson ER. Development and validation of an internationally reliable short-form of the Positive and  
49  
50 678 Negative Affect Schedule (PANAS). *J. Cross. Cult. Psychol.* 2007;38(2):227–242.  
51  
52 679 76. Buysse DJ, Reynolds CF, Monk TH, et al. The Pittsburgh sleep quality index: A new instrument for  
53  
54 680 psychiatric practice and research. *Psychiatry Res.* 1989;28(2):193–213.  
55  
56  
57  
58  
59  
60

- 1  
2  
3 681 77. Trapnell PD, Campbell JD. Private self-consciousness and the five-factor model of personality:  
4  
5 682 Distinguishing rumination from reflection. *J. Pers. Soc. Psychol.* [electronic article]. 1999;76(2):284–304.  
6  
7  
8 683 (<http://doi.apa.org/getdoi.cfm?doi=10.1037/0022-3514.76.2.284>). (Accessed January 14, 2020)  
9  
10 684 78. Preece DA, Becerra R, Robinson K, et al. The Emotion Regulation Questionnaire: Psychometric Properties  
11  
12 685 in General Community Samples. *J. Pers. Assess.* [electronic article]. 2020;102(3):348–356.  
13  
14 686 (<https://www.tandfonline.com/doi/full/10.1080/00223891.2018.1564319>). (Accessed May 25, 2020)  
15  
16  
17 687 79. Leon AC, Davis LL, Kraemer HC. The role and interpretation of pilot studies in clinical research. *J.*  
18  
19 688 *Psychiatr. Res.* 2011;45(5):626–629.  
20  
21 689 80. Elo S, Kyngäs H. The qualitative content analysis process. *J. Adv. Nurs.* 2008;62(1):107–115.  
22  
23 690 81. Kraemer HC, Mintz J, Noda A, et al. Caution regarding the use of pilot studies to guide power calculations  
24  
25 691 for study proposals. *Arch. Gen. Psychiatry* [electronic article]. 2006;63(5):484–489.  
26  
27  
28 692 (<http://archpsyc.jamanetwork.com/article.aspx?doi=10.1001/archpsyc.63.5.484>). (Accessed April 20,  
29  
30 693 2019)  
31  
32 694 82. Walters SJ, Dos Anjos Henriques-Cadby IB, Bortolami O, et al. Recruitment and retention of participants  
33  
34 695 in randomised controlled trials: A review of trials funded and published by the United Kingdom Health  
35  
36 696 Technology Assessment Programme. *BMJ Open* [electronic article]. 2017;7(3):15276.  
37  
38  
39 697 (<http://www.isrctn.com/>). (Accessed December 31, 2020)  
40  
41 698 83. Steenkamp MMM, Marmar CCR, Litz BT, et al. First-line Psychotherapies for Military-Related PTSD.  
42  
43 699 *JAMA.* 2020;323(7):656.  
44  
45  
46 700 84. Troiano RP, Berrigan D, Dodd KW, et al. Physical activity in the United States measured by accelerometer.  
47  
48 701 *Med. Sci. Sports Exerc.* 2008;40(1):181–188.  
49  
50 702 85. Wilson LC. The Prevalence of Military Sexual Trauma: A Meta-Analysis. *Trauma, Violence, Abus.*  
51  
52 703 2018;19(5):584–597.  
53  
54  
55  
56  
57  
58  
59  
60

1  
2  
3  
4  
5  
6  
7  
8  
9  
10  
11  
12  
13  
14  
15  
16  
17  
18  
19  
20  
21  
22  
23  
24  
25  
26  
27  
28  
29  
30  
31  
32  
33  
34  
35  
36  
37  
38  
39  
40  
41  
42  
43  
44  
45  
46  
47  
48  
49  
50  
51  
52  
53  
54  
55  
56  
57  
58  
59  
60

Figure 1. Conceptual model

Figure 2. Depiction of study design and assessments

Figure 3. CONSORT diagram

For peer review only

**Table 1. Baseline characteristics of Veterans in the urban and nature hiking groups**

| Characteristic             | Total (n=26) |            | Nature (n=13) |            | Urban (n=13) |            |
|----------------------------|--------------|------------|---------------|------------|--------------|------------|
|                            | N or<br>mean | % or<br>SD | N or<br>Mean  | % or<br>SD | N or<br>Mean | % or<br>SD |
| <b>Age (years)</b>         |              |            |               |            |              |            |
| <30                        | 2            | 8          | 1             | 8          | 1            | 8          |
| 30-39                      | 5            | 19         | 2             | 15         | 3            | 23         |
| 40-49                      | 6            | 23         | 4             | 31         | 2            | 15         |
| 50-59                      | 11           | 42         | 6             | 46         | 5            | 38         |
| ≥60                        | 2            | 8          | 0             | 0          | 2            | 15         |
| <b>Gender</b>              |              |            |               |            |              |            |
| Male                       | 19           | 73         | 8             | 62         | 11           | 85         |
| Female                     | 7            | 27         | 5             | 38         | 2            | 15         |
| <b>Race/ethnicity</b>      |              |            |               |            |              |            |
| Asian/Pacific Islander, NH | 3            | 12         | 2             | 15         | 1            | 8          |
| Black, NH                  | 2            | 8          | 0             | 0          | 2            | 15         |
| Hispanic                   | 3            | 12         | 1             | 8          | 2            | 15         |
| Native American, NH        | 2            | 8          | 0             | 0          | 2            | 15         |
| Other                      | 1            | 4          | 0             | 0          | 1            | 7.7        |
| White, NH                  | 15           | 58         | 10            | 77         | 5            | 38         |
| <b>Marital status</b>      |              |            |               |            |              |            |
| Single, never married      | 4            | 15         | 3             | 23         | 1            | 8          |
| Married currently          | 14           | 54         | 7             | 54         | 7            | 54         |

| Characteristic                                                              | Total (n=26) |            | Nature (n=13) |            | Urban (n=13) |            |
|-----------------------------------------------------------------------------|--------------|------------|---------------|------------|--------------|------------|
|                                                                             | N or<br>mean | % or<br>SD | N or<br>Mean  | % or<br>SD | N or<br>Mean | % or<br>SD |
| Separated/divorced                                                          | 8            | 31         | 3             | 23         | 5            | 38         |
| <b>Education</b>                                                            |              |            |               |            |              |            |
| High school degree or equivalent                                            | 4            | 15         | 1             | 8          | 3            | 23         |
| Some college, no degree                                                     | 10           | 38         | 7             | 54         | 3            | 23         |
| Associate degree                                                            | 4            | 15         | 1             | 8          | 3            | 23         |
| Bachelor's degree                                                           | 4            | 15         | 2             | 15         | 2            | 15         |
| Masters, doctorate, or professional<br>degree                               | 4            | 15         | 2             | 15         | 2            | 15         |
| <b>Annual household income</b>                                              |              |            |               |            |              |            |
| \$25,000-\$49,999                                                           | 7            | 27         | 4             | 31         | 3            | 23         |
| \$50,000-\$74,999                                                           | 11           | 42         | 4             | 31         | 7            | 54         |
| \$75,000-\$99,999                                                           | 2            | 8          | 1             | 8          | 1            | 8          |
| \$100,000 or more                                                           | 4            | 15         | 3             | 23         | 1            | 8          |
| Prefer not to answer                                                        | 2            | 8          | 1             | 8          | 1            | 8          |
| <b>Employment status</b>                                                    |              |            |               |            |              |            |
| Full-time                                                                   | 12           | 46         | 6             | 46         | 6            | 46         |
| Part-time                                                                   | 1            | 4          | 1             | 8          | 0            | 0          |
| Not employed (disabled, retired, not<br>looking for work, homemaker, other) | 13           | 50         | 6             | 46         | 7            | 54         |
| <b>Highest military rank</b>                                                |              |            |               |            |              |            |

| Characteristic                               | Total (n=26) |            | Nature (n=13) |            | Urban (n=13) |            |
|----------------------------------------------|--------------|------------|---------------|------------|--------------|------------|
|                                              | N or<br>mean | % or<br>SD | N or<br>Mean  | % or<br>SD | N or<br>Mean | % or<br>SD |
| Enlisted (E1-E4)                             | 9            | 35         | 4             | 31         | 5            | 38         |
| Non-commissioned officer (E5-E9)             | 15           | 58         | 8             | 62         | 7            | 54         |
| Officer (O1-O4)                              | 2            | 8          | 1             | 8          | 1            | 8          |
| <b>VA disability rating*†</b>                |              |            |               |            |              |            |
| No rating                                    | 2            | 8          | 0             | 0          | 2            | 15         |
| 30-60%                                       | 2            | 8          | 2             | 15         | 0            | 0          |
| 70-90%                                       | 8            | 31         | 4             | 31         | 4            | 31         |
| 100%                                         | 12           | 46         | 6             | 46         | 6            | 46         |
| <b>Self-reported health</b>                  |              |            |               |            |              |            |
| Excellent/very good                          | 9            | 35         | 3             | 23         | 6            | 45         |
| Good                                         | 11           | 42         | 7             | 54         | 4            | 31         |
| Fair (no one reported poor)                  | 6            | 23         | 3             | 23         | 3            | 23         |
| <b>PCL-5 score‡</b>                          |              |            |               |            |              |            |
| Mean, SD                                     | 47.1         | 10.9       | 46.0          | 11.4       | 48.2         | 10.8       |
| <b>Served in combat [yes]</b>                | 17           | 65         | 8             | 62         | 9            | 69         |
| <b>Combat Exposure Score; mean (SD)* †</b>   | 16.6         | 7.9        | 15.6          | 8.2        | 17.7         | 7.9        |
| <b>Patient Health Questionnaire-8 score*</b> |              |            |               |            |              |            |
| <10 (no depression)                          | 8            | 32         | 4             | 33         | 4            | 31         |
| 10-19 (major depression)                     | 14           | 56         | 7             | 58         | 7            | 54         |
| ≥20 (severe major depression)                | 3            | 12         | 1             | 8          | 2            | 15         |

| Characteristic                                                        | Total (n=26) |            | Nature (n=13) |            | Urban (n=13) |            |
|-----------------------------------------------------------------------|--------------|------------|---------------|------------|--------------|------------|
|                                                                       | N or<br>mean | % or<br>SD | N or<br>Mean  | % or<br>SD | N or<br>Mean | % or<br>SD |
| <b>Physical activity level</b>                                        |              |            |               |            |              |            |
| Low                                                                   | 8            | 31         | 5             | 38         | 3            | 23         |
| Moderate                                                              | 3            | 12         | 1             | 8          | 2            | 15         |
| High                                                                  | 15           | 58         | 7             | 54         | 8            | 62         |
| <b>Times gone hiking for 1+ hrs in last year</b>                      |              |            |               |            |              |            |
| Never                                                                 | 5            | 19         | 3             | 23         | 2            | 15         |
| 1-3                                                                   | 9            | 35         | 4             | 31         | 5            | 38         |
| 4-6                                                                   | 5            | 19         | 2             | 15         | 3            | 23         |
| 7+                                                                    | 7            | 27         | 4             | 31         | 3            | 23         |
| <b>Outdoor / nature-based activity<br/>experience</b>                 |              |            |               |            |              |            |
| None (no experience in the outdoors)                                  | 0            | 0          | 0             | 0          | 0            | 0          |
| Casual (done some day hiking on<br>maintained trails and car camping) | 10           | 38         | 5             | 38         | 5            | 38         |
| Amateur (have experience with<br>backpacking)                         | 11           | 42         | 6             | 46         | 5            | 38         |
| Expert (substantial backcountry<br>experience)                        | 5            | 19         | 2             | 15         | 3            | 23         |

Abbreviations: NH, Non-Hispanic; PCL-5, Post-traumatic stress disorder checklist for Diagnostic and Statistical Manual 5; PTSD, post-traumatic stress disorder; SD, standard deviation

\* Missing response for 1 nature participant

1  
2  
3 † Missing response for 1 urban participant  
4  
5

6 ‡ One person in the nature hiking group had a PCL-5 of 32 (below the eligibility threshold of 33) due to  
7  
8 an undetected error in initial scoring.  
9  
10  
11  
12  
13  
14  
15  
16  
17  
18  
19  
20  
21  
22  
23  
24  
25  
26  
27  
28  
29  
30  
31  
32  
33  
34  
35  
36  
37  
38  
39  
40  
41  
42  
43  
44  
45  
46  
47  
48  
49  
50  
51  
52  
53  
54  
55  
56  
57  
58  
59  
60

For peer review only



**Table 2. Key themes and findings from qualitative data**

| Themes                | Findings                                                                                                                                                                                                                                                                                                                                                                                                                                                                                                                                                    |
|-----------------------|-------------------------------------------------------------------------------------------------------------------------------------------------------------------------------------------------------------------------------------------------------------------------------------------------------------------------------------------------------------------------------------------------------------------------------------------------------------------------------------------------------------------------------------------------------------|
| A positive experience | <ul style="list-style-type: none"> <li>Both nature (“All expectations were exceeded”) and urban study participants (“LOVE THE GROUP”) provided positive feedback.</li> </ul>                                                                                                                                                                                                                                                                                                                                                                                |
| Perceived benefits    | <ul style="list-style-type: none"> <li>Participants reported on how the hikes helped them to be more active, lose weight, reduce stress, and feel more connected to others.</li> </ul>                                                                                                                                                                                                                                                                                                                                                                      |
| Hike logistics        | <ul style="list-style-type: none"> <li>Participants suggested that prior to hikes, we ensure parking access, availability of toilets, and locate the hikes closer to participants’ homes.</li> <li>Others suggested that we consider organizing carpools and/or covering gas/mileage costs</li> </ul>                                                                                                                                                                                                                                                       |
| Difficulty of hikes   | <ul style="list-style-type: none"> <li>Most found the difficulty just right.</li> <li>Some felt that the hikes were too short/easy.</li> </ul>                                                                                                                                                                                                                                                                                                                                                                                                              |
| Location of hikes     | <ul style="list-style-type: none"> <li><u>Nature group</u>: One participant wished that there was more of a “reward” (“like a waterfall”, “when you have a view, it seems more profound”), because some were just “walks through the woods.”</li> <li><u>Urban group</u>: One person noted that some neighborhoods were “sketchy” and they were “constantly walking around garbage” for one hike. Others noted that they really enjoyed exploring different neighborhoods, areas around sports stadium, and learning about the history of areas.</li> </ul> |

|                                                                   |                                                                                                                                                                                                                                                                                                                                                                                                                                                                                                                                                                                                                                                                        |
|-------------------------------------------------------------------|------------------------------------------------------------------------------------------------------------------------------------------------------------------------------------------------------------------------------------------------------------------------------------------------------------------------------------------------------------------------------------------------------------------------------------------------------------------------------------------------------------------------------------------------------------------------------------------------------------------------------------------------------------------------|
| Group composition                                                 | <ul style="list-style-type: none"> <li>• A few participants suggested that we enroll more women or organize women-only groups and/or groups for survivors of sexual assault.</li> </ul>                                                                                                                                                                                                                                                                                                                                                                                                                                                                                |
| Incentives for completing questionnaires                          | <ul style="list-style-type: none"> <li>• Participants suggested that we offer the option to receive a single gift card that accumulated value instead of separate ones each time a questionnaire was completed.</li> </ul>                                                                                                                                                                                                                                                                                                                                                                                                                                             |
| Assessments                                                       | <ul style="list-style-type: none"> <li>• Several participants had trouble with the online software (e.g., getting “kicked out” of the survey mid-way through);</li> <li>• Some participants reported that they would have liked text prompts instead of email, since they did not regularly check their email.</li> <li>• Some participants found some questions to be difficult to answer (e.g., the Perceived Cohesion Scale) or they were confused by differences in the time frame for different instruments (e.g., on the weekly questionnaires, some questions asked participants how they felt “right now” while others asked about the prior week).</li> </ul> |
| Activity monitors                                                 | <ul style="list-style-type: none"> <li>• Several participants noted having problems programming and syncing the activity monitor.</li> </ul>                                                                                                                                                                                                                                                                                                                                                                                                                                                                                                                           |
| Fostering interaction/connections between participants in a group | <ul style="list-style-type: none"> <li>• Participants suggested facilitating more structured ways to get to know other members of the group, including a social gathering prior to the initial hike, re-introductions before each hike, gathering for lunch or other meal after hikes, and organizing a social media group.</li> </ul>                                                                                                                                                                                                                                                                                                                                 |

1  
2  
3  
4  
5  
6  
7  
8  
9  
10  
11  
12  
13  
14  
15  
16  
17  
18  
19  
20  
21  
22  
23  
24  
25  
26  
27  
28  
29  
30  
31  
32  
33  
34  
35  
36  
37  
38  
39  
40  
41  
42  
43  
44  
45  
46  
47  
48  
49  
50  
51  
52  
53  
54  
55  
56  
57  
58  
59  
60



Figure 1. Conceptual model

338x190mm (96 x 96 DPI)



Figure 2. Depiction of study design and assessments

338x190mm (96 x 96 DPI)



Figure 3. CONSORT diagram

254x190mm (96 x 96 DPI)

**Supplemental Table 1. Constructs, instruments, and timing of assessments**

| Constructs                                               | Instrument                                                                               |
|----------------------------------------------------------|------------------------------------------------------------------------------------------|
| Demographics                                             | n/a (Age, gender, race/ethnicity, education, service-connected disability, etc.)         |
| Combat exposure                                          | First two questions of the PTSD Diagnostic Scale-5 (73) and Combat Exposure Scale (74)   |
| Ability to safely perform unsupervised physical activity | Physical Activity Readiness Questionnaire (PAR-Q) (62)                                   |
| Suicidal ideation                                        | MINI Suicidality module (65)                                                             |
| QoL/well-being                                           | Satisfaction with Life Scale (75)                                                        |
| Physical health                                          | 14-item Physical Health Questionnaire (76)                                               |
| PTSD symptoms                                            | PTSD Checklist for DSM- 5 (61)                                                           |
| Depression                                               | Personal Health Questionnaire (PHQ)-8 (77)                                               |
| Perceived Stress                                         | 4-item Perceived Stress Scale (PSS) (78,79)                                              |
| Affect                                                   | 20-item Positive and Negative Affect Schedule (PANAS) (80,81)                            |
|                                                          | 10-item PANAS                                                                            |
| Loneliness                                               | 3-item UCLA loneliness scale (82)                                                        |
| Social connectedness                                     | First four items of the 6-item Perceived Cohesion Scale (83)                             |
| Anxiety                                                  | 20-item Stress and Anxiety Scale (STAI) – state level                                    |
|                                                          | 6-item STAI                                                                              |
| Sleep                                                    | Full (19-item) Pittsburgh Sleep Quality Index (PSQI) (84)                                |
|                                                          | Shortened (5-item) PSQI                                                                  |
| Nature connection                                        | Connectedness to Nature Scale (6-items) (85)                                             |
| Rumination                                               | Full (12-item) state rumination (brooding subscale of Rumination Reflection Scale [RRS]) |
|                                                          | Shortened (8-item) state rumination (brooding subscale of RRS) (86)                      |
| Cognitive reappraisal                                    | 4-item state emotion regulation questionnaire (ERQ) (87)                                 |
| Physical activity – self report                          | 9-item International Physical Activity Questionnaire (IPAQ) short form (68)              |

| Constructs                                 | Instrument                                                     |
|--------------------------------------------|----------------------------------------------------------------|
| Physical activity monitor                  | Wrist worn activity monitor (Garmin Vivosmart 4)               |
| Alcohol consumption                        | 10-item Alcohol Use Disorders Identification Test (AUDIT) (64) |
|                                            | 3-item (AUDIT-C) (88)                                          |
| Drug-related problems                      | Drug Abuse Screening Test-10 (63)                              |
| PTSD treatments                            | n/a                                                            |
| Preference for treatment, hiking frequency | n/a                                                            |
| and expectation about treatment            |                                                                |
| Acceptability of hikes                     | n/a                                                            |

‡Timing of assessment: S/B: screening/baseline, WK: weekly – weeks 1-5 and 7-11, FU: 6-, 12-, and 24-week follow-ups

†A, acceptability; CO, covariate (including moderators); E, eligibility (to assess inclusion/exclusion criteria); M, mediator P, primary outcome; S, secondary outcome

**Figure 1. PTSD Checklist scores at baseline, 12- and to 24-weeks follow-up**



review only





## CONSORT 2010 checklist of information to include when reporting a pilot or feasibility trial\*

| Section/Topic                    | Item No | Checklist item                                                                                                                                                                              | Reported on page No |
|----------------------------------|---------|---------------------------------------------------------------------------------------------------------------------------------------------------------------------------------------------|---------------------|
| <b>Title and abstract</b>        |         |                                                                                                                                                                                             |                     |
|                                  | 1a      | Identification as a pilot or feasibility randomised trial in the title                                                                                                                      | 1                   |
|                                  | 1b      | Structured summary of pilot trial design, methods, results, and conclusions (for specific guidance see CONSORT abstract extension for pilot trials)                                         | 2                   |
| <b>Introduction</b>              |         |                                                                                                                                                                                             |                     |
| Background and objectives        | 2a      | Scientific background and explanation of rationale for future definitive trial, and reasons for randomised pilot trial                                                                      | 5-7                 |
|                                  | 2b      | Specific objectives or research questions for pilot trial                                                                                                                                   | 7                   |
| <b>Methods</b>                   |         |                                                                                                                                                                                             |                     |
| Trial design                     | 3a      | Description of pilot trial design (such as parallel, factorial) including allocation ratio                                                                                                  | 9                   |
|                                  | 3b      | Important changes to methods after pilot trial commencement (such as eligibility criteria), with reasons                                                                                    | 11                  |
| Participants                     | 4a      | Eligibility criteria for participants                                                                                                                                                       | 8                   |
|                                  | 4b      | Settings and locations where the data were collected                                                                                                                                        | 8-10                |
|                                  | 4c      | How participants were identified and consented                                                                                                                                              | 8                   |
| Interventions                    | 5       | The interventions for each group with sufficient details to allow replication, including how and when they were actually administered                                                       | 9-11                |
| Outcomes                         | 6a      | Completely defined prespecified assessments or measurements to address each pilot trial objective specified in 2b, including how and when they were assessed                                | 8, 11-12            |
|                                  | 6b      | Any changes to pilot trial assessments or measurements after the pilot trial commenced, with reasons                                                                                        | n/a                 |
|                                  | 6c      | If applicable, prespecified criteria used to judge whether, or how, to proceed with future definitive trial                                                                                 | n/a                 |
| Sample size                      | 7a      | Rationale for numbers in the pilot trial                                                                                                                                                    | 11                  |
|                                  | 7b      | When applicable, explanation of any interim analyses and stopping guidelines                                                                                                                | n/a                 |
| Randomisation:                   |         |                                                                                                                                                                                             |                     |
| Sequence generation              | 8a      | Method used to generate the random allocation sequence                                                                                                                                      | 9                   |
|                                  | 8b      | Type of randomisation(s); details of any restriction (such as blocking and block size)                                                                                                      | 9                   |
| Allocation concealment mechanism | 9       | Mechanism used to implement the random allocation sequence (such as sequentially numbered containers), describing any steps taken to conceal the sequence until interventions were assigned | 9                   |

|                                                      |     |                                                                                                                                                                                       |                       |
|------------------------------------------------------|-----|---------------------------------------------------------------------------------------------------------------------------------------------------------------------------------------|-----------------------|
| Implementation                                       | 10  | Who generated the random allocation sequence, who enrolled participants, and who assigned participants to interventions                                                               | 8                     |
| Blinding                                             | 11a | If done, who was blinded after assignment to interventions (for example, participants, care providers, those assessing outcomes) and how                                              | 8                     |
|                                                      | 11b | If relevant, description of the similarity of interventions                                                                                                                           | 9-10                  |
| Statistical methods                                  | 12  | Methods used to address each pilot trial objective whether qualitative or quantitative                                                                                                | 9-11                  |
| <b>Results</b>                                       |     |                                                                                                                                                                                       |                       |
| Participant flow (a diagram is strongly recommended) | 13a | For each group, the numbers of participants who were approached and/or assessed for eligibility, randomly assigned, received intended treatment, and were assessed for each objective | Figure 3              |
|                                                      | 13b | For each group, losses and exclusions after randomisation, together with reasons                                                                                                      | Figure 3              |
| Recruitment                                          | 14a | Dates defining the periods of recruitment and follow-up                                                                                                                               | Figure 2, page 11-12  |
|                                                      | 14b | Why the pilot trial ended or was stopped                                                                                                                                              | 12                    |
| Baseline data                                        | 15  | A table showing baseline demographic and clinical characteristics for each group                                                                                                      | Table 1               |
| Numbers analysed                                     | 16  | For each objective, number of participants (denominator) included in each analysis. If relevant, these numbers should be by randomised group                                          | Figure 3              |
| Outcomes and estimation                              | 17  | For each objective, results including expressions of uncertainty (such as 95% confidence interval) for any estimates. If relevant, these results should be by randomised group        | Supplemental Figure 1 |
| Ancillary analyses                                   | 18  | Results of any other analyses performed that could be used to inform the future definitive trial                                                                                      | Table 2               |
| Harms                                                | 19  | All important harms or unintended effects in each group (for specific guidance see CONSORT for harms)                                                                                 | 15                    |
|                                                      | 19a | If relevant, other important unintended consequences                                                                                                                                  | n/a                   |
| <b>Discussion</b>                                    |     |                                                                                                                                                                                       |                       |
| Limitations                                          | 20  | Pilot trial limitations, addressing sources of potential bias and remaining uncertainty about feasibility                                                                             | 17-21                 |
| Generalisability                                     | 21  | Generalisability (applicability) of pilot trial methods and findings to future definitive trial and other studies                                                                     | 17-21                 |
| Interpretation                                       | 22  | Interpretation consistent with pilot trial objectives and findings, balancing potential benefits and harms, and considering other relevant evidence                                   | 17-21                 |
|                                                      | 22a | Implications for progression from pilot to future definitive trial, including any proposed amendments                                                                                 | 17-21                 |
| <b>Other information</b>                             |     |                                                                                                                                                                                       |                       |
| Registration                                         | 23  | Registration number for pilot trial and name of trial registry                                                                                                                        | 3                     |
| Protocol                                             | 24  | Where the pilot trial protocol can be accessed, if available                                                                                                                          | n/a                   |
| Funding                                              | 25  | Sources of funding and other support (such as supply of drugs), role of funders                                                                                                       | 2, 9                  |
|                                                      | 26  | Ethical approval or approval by research review committee, confirmed with reference number                                                                                            | 13                    |

1  
2  
3  
4  
5  
6  
7  
8  
9  
10  
11  
12  
13  
14  
15  
16  
17  
18  
19  
20  
21  
22  
23  
24  
25  
26  
27  
28  
29  
30  
31  
32  
33  
34  
35  
36  
37  
38  
39  
40  
41  
42  
43  
44  
45  
46

Citation: Eldridge SM, Chan CL, Campbell MJ, Bond CM, Hopewell S, Thabane L, et al. CONSORT 2010 statement: extension to randomised pilot and feasibility trials. *BMJ*. 2016;355.  
\*We strongly recommend reading this statement in conjunction with the CONSORT 2010, extension to randomised pilot and feasibility trials, Explanation and Elaboration for important clarifications on all the items. If relevant, we also recommend reading CONSORT extensions for cluster randomised trials, non-inferiority and equivalence trials, non-pharmacological treatments, herbal interventions, and pragmatic trials. Additional extensions are forthcoming: for those and for up to date references relevant to this checklist, see [www.consort-statement.org](http://www.consort-statement.org).

For peer review only
