# Supplementary material for: Nature versus urban hiking for Veterans with post-traumatic stress disorder: a pilot randomised trial conducted in the Pacific Northwest USA
Source: PubMed Central journal article supplement — BMJ Open. 2021 Sep 23;11(9):e051885. doi: 10.1136/bmjopen-2021-051885 (PMC8461737; doi:10.1136/bmjopen-2021-051885), 2021-09-23
Supplement: bmjopen-2021-051885supp001.pdf [file bmjopen-2021-051885supp001.pdf]

**Supplemental Table 1. Constructs, instruments, and timing of assessments**

| Constructs                                               | Instrument                                                                                                                                                      |
|----------------------------------------------------------|-----------------------------------------------------------------------------------------------------------------------------------------------------------------|
| Demographics                                             | n/a (Age, gender, race/ethnicity, education, service-connected disability, etc.)                                                                                |
| Combat exposure                                          | First two questions of the PTSD Diagnostic Scale-5 (73) and Combat Exposure Scale (74)                                                                          |
| Ability to safely perform unsupervised physical activity | Physical Activity Readiness Questionnaire (PAR-Q) (62)                                                                                                          |
| Suicidal ideation                                        | MINI Suicidality module (65)                                                                                                                                    |
| QoL/well-being                                           | Satisfaction with Life Scale (75)                                                                                                                               |
| Physical health                                          | 14-item Physical Health Questionnaire (76)                                                                                                                      |
| PTSD symptoms                                            | PTSD Checklist for DSM- 5 (61)                                                                                                                                  |
| Depression                                               | Personal Health Questionnaire (PHQ)-8 (77)                                                                                                                      |
| Perceived Stress                                         | 4-item Perceived Stress Scale (PSS) (78,79)                                                                                                                     |
| Affect                                                   | 20-item Positive and Negative Affect Schedule (PANAS) (80,81)<br>10-item PANAS                                                                                  |
| Loneliness                                               | 3-item UCLA loneliness scale (82)                                                                                                                               |
| Social connectedness                                     | First four items of the 6-item Perceived Cohesion Scale (83)                                                                                                    |
| Anxiety                                                  | 20-item Stress and Anxiety Scale (STAI) – state level<br>6-item STAI                                                                                            |
| Sleep                                                    | Full (19-item) Pittsburgh Sleep Quality Index (PSQI) (84)<br>Shortened (5-item) PSQI                                                                            |
| Nature connection                                        | Connectedness to Nature Scale (6-items) (85)                                                                                                                    |
| Rumination                                               | Full (12-item) state rumination (brooding subscale of Rumination Reflection Scale [RRS])<br>Shortened (8-item) state rumination (brooding subscale of RRS) (86) |
| Cognitive reappraisal                                    | 4-item state emotion regulation questionnaire (ERQ) (87)                                                                                                        |
| Physical activity – self report                          | 9-item International Physical Activity Questionnaire (IPAQ) short form (68)                                                                                     |

| Constructs                                                                    | Instrument                                                                              |
|-------------------------------------------------------------------------------|-----------------------------------------------------------------------------------------|
| Physical activity monitor                                                     | Wrist worn activity monitor (Garmin Vivosmart 4)                                        |
| Alcohol consumption                                                           | 10-item Alcohol Use Disorders Identification Test (AUDIT) (64)<br>3-item (AUDIT-C) (88) |
| Drug-related problems                                                         | Drug Abuse Screening Test-10 (63)                                                       |
| PTSD treatments                                                               | n/a                                                                                     |
| Preference for treatment, hiking frequency<br>and expectation about treatment | n/a                                                                                     |
| Acceptability of hikes                                                        | n/a                                                                                     |

‡Timing of assessment: S/B: screening/baseline, WK: weekly – weeks 1-5 and 7-11, FU: 6-, 12-, and 24-week

follow-ups

†A, acceptability; CO, covariate (including moderators); E, eligibility (to assess inclusion/exclusion criteria); M, mediator P, primary outcome; S, secondary outcome
