# Supplementary figures and images for: Nature versus urban hiking for Veterans with post-traumatic stress disorder: a pilot randomised trial conducted in the Pacific Northwest USA
Source: PubMed Central journal article supplement — BMJ Open. 2021 Sep 23;11(9):e051885. doi: 10.1136/bmjopen-2021-051885 (PMC8461737; doi:10.1136/bmjopen-2021-051885), 2021-09-23

**Figure 1. PTSD Checklist scores at baseline, 12- and to 24-weeks follow-up**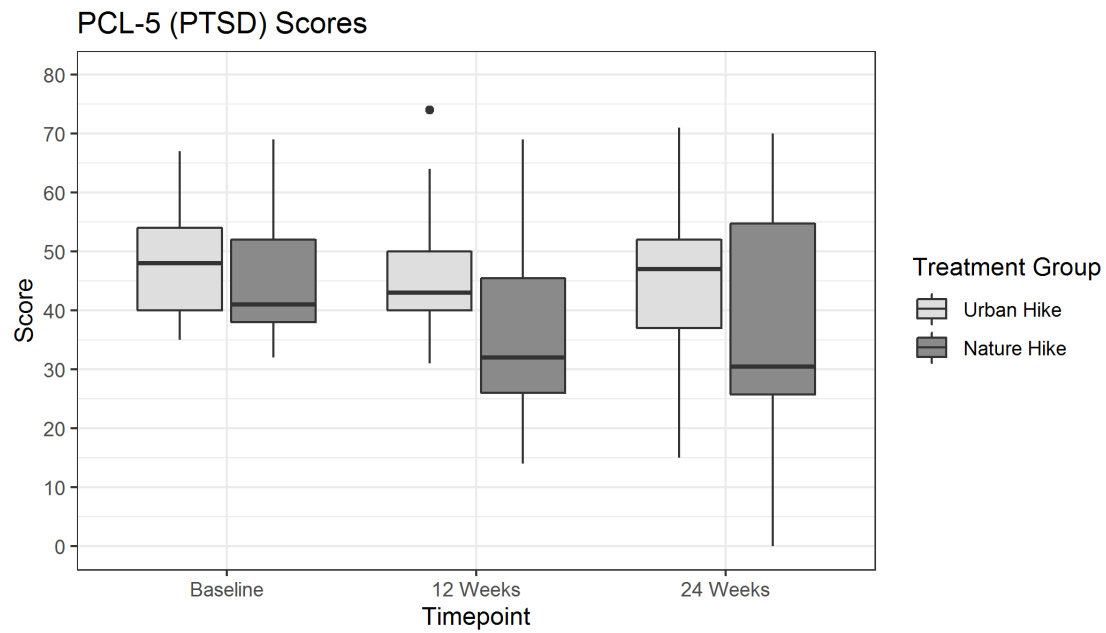

Supplement: bmjopen-2021-051885supp002.pdf [file bmjopen-2021-051885supp002.pdf]
